# Supplementary material for: Microbial communities inhabiting the surface and gleba of white (Tuber magnatum) and black (Tuber macrosporum) truffles from Russia
Source: PeerJ. 2025 Sep 19;13:e20037. doi: 10.7717/peerj.20037 (PMC12452945; doi:10.7717/peerj.20037)
Supplement: Supplemental Information 6 — The initial data demonstrates the successful sequencing of all symbiont species of truffle fungi, as well as the differences in the composition of microorganisms between the peridium and the gleba. Additionally, mass spectrometric analysis confirms the differences in chemical composition between these two parts of the truffle. [file peerj-13-20037-s006.xlsx]

## Sheet: 16S
Host	Profile	Identification	Peridium	Gleba	Sequences
Tuber macrosporum	16S	Beggiatoaceae	-	0.835655	AAGAACGCAGCGAAATGCGATACGTAGTACGAAACGCAAGTCGTGAATCATCGAATCTTTGAACGCACATTGCGCTGCGAGGCATTCCTCGCAGCATGCCTGTTTGAGCGTCCTTTCTCTCTCGAAAGGTTGTGGGTGGCACGCTGGTAAGCGTCCGTCTGAAAGGTAACCGTCACGACTGTCAAGTAAGTCGCCGACTAACCACTTTTGACCTCAAATCAGGTAGGACTACCCGCTGAACTTAAGCATATCAATAAGC
Tuber macrosporum	16S	Clostridiaceae	4.65686	-	CGCGGTAATACGTAGGTGGCAAGCGTTGTCCGGATTTACTGGGCGTAAAGGATGCGTAGGCGGACATTTAAGTCAGATGTGAAATACCCGAGCTTAACTTGGGTGCTGCATTTGAAACTGGGTGTCTAGAGTGCAGGAGAGGTAAGTGGAATTCCTAGTGTAGCGGTGAAATGCGTAGAGATTAGGAAGAACACCAGTGGCGAAGGCGACTTACTGGACTGTAACTGACGCTGAGGCATGAAAGCGTGGGGAGCAAACAGGATTA
Tuber macrosporum	16S	Clostridiaceae	0.490196	-	GGAGGAAGCCACGGCTAACTACGTGCCAGCAGCCGCGGTAATACGTAGGTGGCAAGCGTTGTCCGGATTTACTGGGCGTAAAGGATGCGTAGGCGGACATTTAAGTCAGATGTGAAATACCCGAGCTTAACTTGGGTGCTGCATTTGAAACTGGGTGTCTAGAGTGCAGGAGAGGTAAGTGGAATTCCTAGTGTAGCGGTGAAATGCGTAGAGATTAGGAAGAACACCAGTGGCGAAGGCGACTTACTGGACTGTAACTGACGCTGAGGCATGAAAGCGTGGGGAGCAAACAGGATTA
Tuber macrosporum	16S	Geitlerinemaceae	12.9902	-	CCTCTTCGTCGGCAGCGTCAGATGTGTATAAGAGACAGTGCCTACGGGGGGCAGCAGGACAACGAAGTCGACATGGTAGATGCCAGCAAGTTGGCCACAAAACTACCATGTGACTGGAAATCTGCCGTGCCCAAAGCCTGTGTCGAACATCTCGCGGGATTAGATACCCCTGTAGTCCGGTTCTGTCTCTTATACACATCTCCGAGCCCACGAGACTC
Tuber macrosporum	16S	Lactobacillaceae	3.18627	-	CGCGGTAATACGTATGTCCCGAGCGTTATCCGGATTTATTGGGCGTAAAGCGAGCGCAGACGGTTGGTTAAGTCTGATGTGAAAGCCCGGAGCTCAACTCCGGAAAGGCATTGGAAACTGGTTAACTTGAGTGCAGTAGAGGTAAGTGGAACTCCATGTGTAGCGGTGGAATGCGTAGATATATGGAAGAACACCAGCGGCGAAGGCGGCTTACTGGACTGTAACTGACGTTGAGGCTCGAAAGTGTGGGTAGCAAACAGGATTA
Tuber macrosporum	16S	Lactobacillaceae	2.45098	-	CGCGGTAATACGTATGTCCCGAGCGTTATCCGGATTTATTGGGCGTAAAGCGAGCGCAGACGGTTAATTAAGTCTGATGTGAAAGCCCGGAGCTCAACTCCGGAAAGGCATTGGAAACTGGTTAACTTGAGTGCAGTAGAGGTAAGTGGAACTCCATGTGTAGCGGTGGAATGCGTAGATATATGGAAGAACACCAGCGGCGAAGGCGGCTTACTGGACTGTAACTGACGTTGAGGCTCGAAAGTGTGGGTAGCAAACAGGATTA
Tuber macrosporum	16S	Listeriaceae	3.43137	-	CGCGGTAATACGTAGGTGGCAAGCGTTGTCCGGAATTATTGGGCGTAAAGCGCGCGCAGGCGGTCTCTTAAGTCTGATGTGAAAGCCCCCGGCTCAACCGGGGAGGGTCATTGGAAACTGGGAGACTTGAGGACAGAAGAGGAGAGTGGAATTCCAAGTGTAGCGGTGAAATGCGTAGATATTTGGAGGAACACCAGTGGCGAAGGCGGCTCTCTGGTCTGTTACTGACGCTGAGGCGCGAAAGCGTGGGGAGCAAACAGGATTA
Tuber macrosporum	16S	Mitochondria	-	20.8914	GGAGGCAGCAGTAATTAACCTTAAGCAATAAGTGTAAACTTGACTTAGCCATAGCAACCCAGGGTTGGTAAATCTTGTGCCAGCCACCGCGGTCATACAAGAAACCCAAATCAATAGCTACCCGGCGTAAAGAGTGGCCACATGTTATCTGCACCAGCTAAGATTAAAATGCAACCAAGCTGTCATAAGCCTAAGATCCACCTAAACCCAACCCAAATCCATCTTAGCCTCAACGATTAATTTTAACCCACGAAAGCTAGGACCCAAACTGGGATTAGATACCCGCGT
Tuber macrosporum	16S	Mitochondria	-	13.0919	AAGAACGCAGCGAAACGCGATATTTCTTGTGAATTGCAGAAGTGAATCATCAGTTTTTGAACGCACATTGCACTTTGGGGTATCCCCCAAAGTATACTTGTTTGAGCGTTGTTTCTCTCTTGGAATTGCTTTGCTCTTCTAAAATTTCGAATCAAATTCGTTTGAAAAACAACACTATTCAACCTCAGATCAAGTAGGATTACCCGCTGAACTTAAGCATATCAATAAGC
Tuber macrosporum	16S	Mitochondria	-	9.7493	GGAGGCAGCAGTCGCGGTAATACGTGAGAGACTAGCGTTATTCATATTTAATTGGTTTAAAGGGTTACTAGACGGTAATTTTTGCCTTTGAATGGGGACAGAGTTACTAGAGTTTTATGTGAAAAGTATATTTAGAACTCATGGTGTAGAACTGATAATTTAAAATACTATGGGGAATGATAAAGGCGAAGGCAAACTTTTATGTAAAAACTGACGTTGAGGAACGAAGGCAAGGACAGTGAATAGGATTAGAAACCCCCGTA
Tuber macrosporum	16S	Mitochondria	-	7.24234	GGGGGCAGCAGGGCCAAAGCTCGGGGCTGCTCTCTCTGAGCTGGTACATCTCCTTGTTTAGCACAGATGGATTGGAAGCCATGATGTCAAGCCTGGCAGAGATACTGTGAAAAAAGGTCAAGCAACTAGCTCATCCTGAAACATACTCCTTTTACTCCTCCTCATCTAGTTCTAAATCTGTTTCACTTTTATAGGGGGGGATTAGAAACCCCAGTA
Tuber macrosporum	16S	Mitochondria	21.5686	-	TCAGATGTGTATAAGAGACAGTGCCTACGGGGTGCAGCAGCTAAGATTAAAATGCAACCAAGCTGTCATAAGCCTAAGATCCACCTAAACCCAACCCAAATCCATCTTAGCCTCAACGATTAATTTTAACCCACGAAAGCTAGGACCCAAACTGGGATTAGAAACCCTAGTAGTCCGGTTCTGTCTCTTATACACATCTC
Tuber macrosporum	16S	Mitochondria	-	5.57103	GGGTGCACCAGGGGAGGTTCAGGTTGGATACTAAGAATAATTTTTTATCAGTAAGAGTGGTGAGGTATTGGAACAGGCTGCCCAGAGGGGTGGTGGAGTCACCATTCCTGGAGTTGTTCAAGAGCTGTGTATATGTGGCACCGAGGGACATGGTTACTCAGTATGGTGGGGATAGGTTAATAGTTGGATTAGAAACCCGCGT
Tuber macrosporum	16S	Pirellulaceae	1.47059	-	GAGGCCAATTGCTGTACTGGTAAGGGAGTGTCTTTGTTGAAGATTAGTGGGCCTCCCTAATTTGTTGCACCTAGACTAGCTTGGCCCCACTCGCTCTCGGAACTCAAAGCCTGAAGAAGTAGTGGACTGGAGGACGATTCGAACCTACGACCGTCGGATT
Tuber macrosporum	16S	Rhizobiaceae	-	12.2563	GGTGGCAGCAGCCGCGGTAATACGAAGGGGGCTAGCGTTGTTCGGATTTACTGGGCGTAAAGCGCACGTAGGCGGACTATTAAGTCAGGGGTGAAATCCCGGGGCTCAACCCCGGAACTGCCTTTGATACTGGTAGTCTTGAGTTCGAGAGAGGTGAGTGGAATTCCGAGTGTAGAGGTGAAATTCGTAGATATTCGGAGGAACACCAGTGGCGAAGGCGGCTCACTGGCTCGATACTGACGCTGAGGTGCGAAAGCGTGGGGAGCAAACAGGATTAGATACCCCCGTA
Tuber macrosporum	16S	Rhizobiaceae	-	11.6992	GGTGGCAGCAGCCGCGGTAATACGAAGGGGGCTAGCGTTGTTCGGATTTACTGGGCGTAAAGCGCACGTAGGCGGACTATTAAGTCAGGGGTGAAATCCCGGGGCTCAACCCCGGAACTGCCTTTGATACTGGTAGTCTTGAGTTCGAGAGAGGTGAGTGGAATTCCGAGTGTAGAGGTGAAATTCGTAGATATTCGGAGGAACACCAGTGGCGAAGGCGGCTCACTGGCTCGATACTGACGCTGAGGTGCGAAAGCGTGGGGAGCAAACAGGATTAGAAACCCCTG
Tuber macrosporum	16S	Rhizobiaceae	-	9.1922	GGTGGCAGCAGCCGCGGTAATACGAAGGGGGCTAGCGTTGTTCGGATTTACTGGGCGTAAAGCGCACGTAGGCGGACTATTAAGTCAGGGGTGAAATCCCGGGGCTCAACCCCGGAACTGCCTTTGATACTGGTAGTCTTGAGTTCGAGAGAGGTGAGTGGAATTCCGAGTGTAGAGGTGAAATTCGTAGATATTCGGAGGAACACCAGTGGCGAAGGCGGCTCACTGGCTCGATACTGACGCTGAGGTGCGAAAGCGTGGGGAGCAAACAGGATTAGAAACCCCCG
Tuber macrosporum	16S	Streptococcaceae	22.7941	-	CGCGGTAATACGTAGGTCCCGAGCGTTGTCCGGATTTATTGGGCGTAAAGCGAGCGCAGGTGGTTTATTAAGTCTGGTGTAAAAGGCAGTGGCTCAACCATTGTATGCATTGGAAACTGGTAGACTTGAGTGCAGGAGAGGAGAGTGGAATTCCATGTGTAGCGGTGAAATGCGTAGATATATGGAGGAACACCGGTGGCGAAAGCGGCTCTCTGGCCTGTAACTGACACTGAGGCTCGAAAGCGTGGGGAGCAAACAGGATTA
Tuber macrosporum	16S	Streptococcaceae	13.7255	-	TGTGTATAAGAGACAGTGCCTACGGGGTGCAGCAGAGGAGAGTGGAATTCCATGTGTAGCGGTGAAATGCGTAGATATATGGAGGAACACCGGTGGCGAAAGCGGCTCTCTGGCCTGTAACTGACACTGAGGCTCGAAAGCGTGGGGAGCAAACAGGATTAGATACCCCTGTAGTCCGGTCTGTCTCTTATACACA
Tuber macrosporum	16S	Streptococcaceae	12.9902	-	TGTGTATAAGAGACAGTGCCTACGGGGGGCAGCAGAGGAGAGTGGAATTCCATGTGTAGCGGTGAAATGCGTAGATATATGGAGGAACACCGGTGGCGAAAGCGGCTCTCTGGCCTGTAACTGACACTGAGGCTCGAAAGCGTGGGGAGCAAACAGGATTAGATACCCCTGTAGTCCGGTCTGTCTCTTATACACA
Tuber macrosporum	16S	Streptococcaceae	0.245098	-	ATGCATTGGAAACTGGTAGACTTGAGTGCAGGAGAGGAGAGTGGAATTCCATGTGTAGCGGTGAAATGCGTAGATATATGGAGGAACACCGGTGGCGAAAGCGGCTCTCTGGCCTGTAACTGACACTGAGGCTCGAAAGCGTGGGGAGCAAACAGGATTAGATACCCCTGTAGTCCGGTCTGTCTCTTATACACA
Tuber macrosporum	16S	Xanthobacteraceae	-	9.47075	GGGGGCAGCAGCCGCGGTAATACGAAGGGGGCTAGCGTTGCTCGGAATCACTGGGCGTAAAGGGTGCGTAGGCGGGTCTTTAAGTCAGGGGTGAAATCCTGGAGCTCAACTCCAGAACTGCCTTTGATACTGAAGATCTTGAGTTCGGGAGAGGTGAGTGGAACTGCGAGTGTAGAGGTGAAATTCGTAGATATTCGCAAGAACACCAGTGGCGAAGGCGGCTCACTGGCCCGATACTGACGCTGAGGCACGAAAGCGTGGGGAGCAAACAGGATTAGAAACCCCCG
Tuber macrosporum	16S	Beggiatoaceae	-	1.24805	AGCGTCAGATGTGTATAAGAGACAGTCTCGATGAAGAACGCAGCGGGCACATTCATGAGACTGATGTCTCAATTATTTAGCGATATGCTGGGAAAATTCGTATGGATATACATTGATGATATCTTGATTTTCTCCGATACAGAACAGGATCATCTTGAGCATATCAATAAGCGGAGGATGCTGTCTCTTATACACATCTCCGAGC
Tuber macrosporum	16S	Erysipelatoclostridiaceae	-	2.4961	GAGGTCTGTGGTGAAAGACTGAAGCTTAACTTCAGTAAGCCATAGAAACCGGGCTGCTAGAGTGCAGGAGAGGATCGTGGAATTCCATGTGTAGCGGTGAAATGCGTAGATATATGGAGGAACACCAGTGGCGAAGGCGACGGTCTGGCCTGTAACTGACGCTCATTCCCGAAAGCGTGGGGAGCAAATAGGAT
Tuber macrosporum	16S	Flavobacteriaceae	12.9853	-	GGGCGCACCAGCCATGAACCACCGATACACAGCACGCTTTTCAGCGCCAGGTAATCACGGTAGTTCTTCGGTGAAATCCCACCTGTCGGGCAGAAACGCACCTGCGGGAACGGACCGGCAATCGCCTGCAACGCTTTCACGCCGCCATTGGCTTCAGCCGGGAAGAATTTAAACTCGCGCAGACCGGCATCCAGACCCATCATCAGTTCGGACACGGTGCAAATGCCCGGAATCAGCGGATTAGAAACCCTCGT
Tuber macrosporum	16S	Geitlerinemaceae	-	43.8378	TCAGATGTGTATAAGAGACAGTGCCTACGGGTGGCAGCAGCTAAGATTAAAATGCAACCAAGCTGTCATAAGCCTAAGATCCACCTAAACCCAACCCAAATCCATCTTAGCCTCAACGATTAATTTTAACCCACGAAAGCTAGGACCCAAACTGGGATTAGAAACCCCTGTAGTCCGGTTCTGTCTCTTATACACATCTCC
Tuber macrosporum	16S	Geitlerinemaceae	-	25.429	GCGTCAGATGTGTATAAGAGACAGTGCCTACGGGCGGCAGCAGGTGATTTTTCTTCGCCAGACAAACGTCGTCGCGAACGAGGAAACCGCAGTCGTACATCTCAACGACCGCACCATCGAAGGGCCCTATACCACGACAGACCTTGATTCTTTCGGGATTAGATACCCTTGTAGTCCGGTCTGTCTCTTATACACATCTCCGA
Tuber macrosporum	16S	Micrococcaceae	2.94511	-	GGCGGCAGCAGTGGGTACGGGCAGACTAGAGTGATGTAGGGGAGACTGGAATTCCTGGTGTAGCGGTGAAATGCGCAGATATCAGGAGGAACACCGATGGCGAAGGCAGGTCTCTGGGCATTAACTGACGCTGAGGAGCGAAAGCATGGGGAGCGAACAGGATTAGATACCCCCGT
Tuber macrosporum	16S	Mitochondria	10.0402	-	AAGAACGCAGCGAAACGCGATATTTCTTGTGAATTGCAGAAGTGAATCATCAGTTTTTGAACGCACATTGCACTTTGGGGTATCCCCCAAAGTATACTTGTTTGAGCGTTGTTTCTCTCTTGGAATTGCTTTGCTCTTCTAAAATTTCGAATCAAATTCGTTTGAAAAACAACACTATTCAACCTCAGATCAAGTAGGATTACCCGCTGAACTTAAGCATATCAATAAGC
Tuber macrosporum	16S	Mitochondria	-	7.17629	AAACGCGATATTTCTTGTGAATTGCAGAAGTGAATCATCAGTTTTTGAACGCACATTGCACTTTGGGGTATCCCCCAAAGTATACTTGTTTGAGCGTTGTTTCTCTCTTGGAATTGCTTTGCTCTTCTAAAATTTCGAATCAAATTCGTTTGAAAAACAACACTATTCAACCTCAGATCAAGTAGGATTACCCGCTGAACTTAAGC
Tuber macrosporum	16S	Mitochondria	-	1.40406	AGCGTCAGATGTGTATAAGAGACAGTCTCGATGAAGAACGCAGCGGGCACATTCATGAGACTGATGTCTGAATTATTTAGCGATATGCTGGGAAAATTCGTATGGATCTACATTGATGATATCTTGATTTTCTCAGATACGGAACAGGATTATCTTGAGCATATCAATAAGCGGAGGATGCTGTCTCTTATACACATCTCCGAGC
Tuber macrosporum	16S	Mitochondria	-	2.18409	AGCGTCAGATGTGTATAAGAGACAGTCTCGATGAAGAACGCAGCGGGTACATTCATGAGACTGATGTCTGAATTATTTAGCGATATGCTGGGAAAATTCGTATAGATCTACATTGATGATATCTTGATTTTCTCAGATACAGAACAGGATCATCTTGAGCATATCAATAAGCGGAGGATGCTGTCTCTTATACACATCTCCGAGC
Tuber macrosporum	16S	Pectobacteriaceae	-	3.58814	GCCGCGGTAATACGGAGGGTGCAAGCGTTAATCGGAATTACTGGGCGTAAAGCGCACGCAGGCGGTTTGTTAAGTCAGATGTGAAATCCCCGAGCTTAACTTGGGAACTGCATTTGAAACTGGCAAGCTAGAGTCTTGTAGAGGGGGGTAGAATTCCAGGTGTAGCGGTGAAATGCGTAGAGATCTGGAGGAATACCGGTGGCGAAGGCGGCCCCCTGGACAAAGACTGACGCTCAGGTGCGAAAGCGTGGGGAGCAAACAGGAT
Tuber macrosporum	16S	Pectobacteriaceae	2.00803	-	GGTGGCAGCAGGCGGTTTGTTAAGTCAGATGTGAAATCCCCGAGCTTAACTTGGGAACTGCATTTGAAACTGGCAAGCTAGAGTCTTGTAGAGGGGGGTAGAATTCCAGGTGTAGCGGTGAAATGCGTAGAGATCTGGAGGAATACCGGTGGCGAAGGCGGCCCCCTGGACAAAGACTGACGCTCAGGTGCGAAAGCGTGGGGAGCAAACAGGATTAGAAACCCCCGT
Tuber macrosporum	16S	Pectobacteriaceae	-	1.40406	CGGTTTGTTAAGTCAGATGTGAAATCCCCGAGCTTAACTTGGGAACTGCATTTGAAACTGGCAAGCTAGAGTCTTGTAGAGGGGGGTAGAATTCCAGGTGTAGCGGTGAAATGCGTAGAGATCTGGAGGAATACCGGTGGCGAAGGCGGCCCCCTGGACAAAGACTGACGCTCAGGTGCGAAAGCGTGGGGAGCAAACAGGAT
Tuber macrosporum	16S	Pirellulaceae	12.1821	-	GGGGCGCAGCAGGAAAGGACGGAACGGGGAGCACCAATCACGGTGCATGTGAATTGGGAGTCTGTCATCGTGCGGACTGCAGGTGCAGGTGCTTACCTCGTGAGACTGCTTCCCAATGTAACTTACCTGGCCCCCACATCCGATAAACGTAACACAGCGAGCACTACCAAGTGGAACAGCAGCGAAACAAATACCATATCTAGTCGGGATTAGAAACCCGCGTA
Tuber macrosporum	16S	Pirellulaceae	-	5.61622	GAAAGGACGGAACGGGGAGCACCAATCACGGTGCATGTGAATTGGGAGTCTGTCATCGTGCGGACTGCAGGTGCAGGTGCTTACCTCGTGAGACTGCTTCCCAATGTAACTTACCTGGCCCCCACATCCGATAAACGTAACACAGCGAGCACTACCAAGTGGAACAGCAGCGAAACAAATACCATATCTAGTCGGGATTA
Tuber macrosporum	16S	Pseudomonadaceae	-	1.87207	CGCGGTAATACAGAGGGTGCAAGCGTTAATCGGAATTACTGGGCGTAAAGCGCGCGTAGGTGGTTAGTTAAGTTGGATGTGAAATCCCCGGGCTCAACCTGGGAACTGCATTCAAAACTGACTGACTAGAGTATGGTAGAGGGTGGTGGAATTTCCTGTGTAGCGGTGAAATGCGTAGATATAGGAAGGAACACCAGTGGCGAAGGCGACCACCTGGACTGATACTGACACTGAGGTGCGAAAGCGTGGGGAGCAAACAGGAT
Tuber macrosporum	16S	Reyranellaceae	-	1.24805	CGCGGTAAGACGAAGGGGGCTAGCGTTGTTCGGAATTACTGGGCGTAAAGCGAGTGTAGGTGGTTGTCCAAGTTGGATGTGAAAGCCTTGAGCTCAACTCAAGAAATGCATTCAGGACTGGGCGGCTAGAGGACCGGAGAGGATAGTGGAATTCCCAGTGTAGTGGTGAAATACGTAGAGATTGGGAAGAACACCAGTGGCGAAGGCGGCTATCTGGACGGTTTCTGACACTAAGACTCGAAAGCGTGGGGAGCAAACAGGATT
Tuber macrosporum	16S	Rhizobiaceae	3.8822	-	GGGGGCAGCAGCCGCGGTAATACGAAGGGGGCTAGCGTTGTTCGGAATTACTGGGCGTAAAGCGCACGTAGGCGGACATTTAAGTCAGGGGTGAAATCCCAGAGCTCAACTCTGGAACTGCCTTTGATACTGGGTGTCTAGAGTATGGAAGAGGTGAGTGGAATTCCGAGTGTAGAGGTGAAATTCGTAGATATTCGGAGGAACACCAGTGGCGAAGGCGGCTCACTGGTCCATTACTGACGCTGAGGTGCGAAAGCGTGGGGAGCAAACAGGATTAGATACCCGCGT
Tuber macrosporum	16S	Rhizobiaceae	3.8822	-	GGGGGCAGCAGCCGCGGTAATACGAAGGGGGCTAGCGTTGTTCGGAATTACTGGGCGTAAAGCGCACGTAGGCGGACATTTAAGTCAGGGGTGAAATCCCAGAGCTCAACTCTGGAACTGCCTTTGATACTGGGTGTCTAGAGTATGGAAGAGGTGAGTGGAATTCCGAGTGTAGAGGTGAAATTCGTAGATATTCGGAGGAACACCAGTGGCGAAGGCGGCTCACTGGTCCATTACTGACGCTGAGGTGCGAAAGCGTGGGGAGCAAACAGGATTAGAAACCCCCG
Tuber macrosporum	16S	Rhizobiaceae	3.48059	-	GGGGGCAGCAGCCGCGGTAATACGAAGGGGGCTAGCGTTGTTCGGAATTACTGGGCGTAAAGCGCACGTAGGCGGACATTTAAGTCAGGGGTGAAATCCCAGAGCTCAACTCTGGAACTGCCTTTGATACTGGGTGTCTAGAGTATGGAAGAGGTGAGTGGAATTCCGAGTGTAGAGGTGAAATTCGTAGATATTCGGAGGAACACCAGTGGCGAAGGCGGCTCACTGGTCCATTACTGACGCTGAGGTGCGAAAGCGTGGGGAGCAAACAGGATTAGATACCCCAGTA
Tuber macrosporum	16S	Rhizobiaceae	3.34672	-	GGGGGCAGCAGCCGCGGTAATACGAAGGGGGCTAGCGTTGTTCGGAATTACTGGGCGTAAAGCGCACGTAGGCGGACATTTAAGTCAGGGGTGAAATCCCAGAGCTCAACTCTGGAACTGCCTTTGATACTGGGTGTCTAGAGTATGGAAGAGGTGAGTGGAATTCCGAGTGTAGAGGTGAAATTCGTAGATATTCGGAGGAACACCAGTGGCGAAGGCGGCTCACTGGTCCATTACTGACGCTGAGGTGCGAAAGCGTGGGGAGCAAACAGGATTAGAAACCCTCG
Tuber macrosporum	16S	Rhizobiaceae	3.21285	-	GGGGGCAGCAGCCGCGGTAATACGAAGGGGGCTAGCGTTGTTCGGAATTACTGGGCGTAAAGCGCACGTAGGCGGACATTTAAGTCAGGGGTGAAATCCCAGAGCTCAACTCTGGAACTGCCTTTGATACTGGGTGTCTAGAGTATGGAAGAGGTGAGTGGAATTCCGAGTGTAGAGGTGAAATTCGTAGATATTCGGAGGAACACCAGTGGCGAAGGCGGCTCACTGGTCCATTACTGACGCTGAGGTGCGAAAGCGTGGGGAGCAAACAGGATTAGATACCCTCGT
Tuber macrosporum	16S	Rhizobiaceae	2.81124	-	GGGGGCAGCAGCCGCGGTAATACGAAGGGGGCTAGCGTTGTTCGGAATTACTGGGCGTAAAGCGCACGTAGGCGGACATTTAAGTCAGGGGTGAAATCCCAGAGCTCAACTCTGGAACTGCCTTTGATACTGGGTGTCTAGAGTATGGAAGAGGTGAGTGGAATTCCGAGTGTAGAGGTGAAATTCGTAGATATTCGGAGGAACACCAGTGGCGAAGGCGGCTCACTGGTCCATTACTGACGCTGAGGTGCGAAAGCGTGGGGAGCAAACAGGATTAGAAACCCGCGT
Tuber macrosporum	16S	Rhizobiaceae	2.54351	-	GGTGGCAGCAGCCGCGGTAATACGAAGGGGGCTAGCGTTGTTCGGAATTACTGGGCGTAAAGCGCACGTAGGCGGACATTTAAGTCAGGGGTGAAATCCCAGAGCTCAACTCTGGAACTGCCTTTGATACTGGGTGTCTAGAGTATGGAAGAGGTGAGTGGAATTCCGAGTGTAGAGGTGAAATTCGTAGATATTCGGAGGAACACCAGTGGCGAAGGCGGCTCACTGGTCCATTACTGACGCTGAGGTGCGAAAGCGTGGGGAGCAAACAGGATTAGATACCCCAGTA
Tuber macrosporum	16S	Rhizobiaceae	1.87416	-	GGTGGCAGCAGCCGCGGTAATACGAAGGGGGCTAGCGTTGTTCGGAATTACTGGGCGTAAAGCGCACGTAGGCGGACATTTAAGTCAGGGGTGAAATCCCAGAGCTCAACTCTGGAACTGCCTTTGATACTGGGTGTCTAGAGTATGGAAGAGGTGAGTGGAATTCCGAGTGTAGAGGTGAAATTCGTAGATATTCGGAGGAACACCAGTGGCGAAGGCGGCTCACTGGTCCATTACTGACGCTGAGGTGCGAAAGCGTGGGGAGCAAACAGGATTAGATACCCCCGTA
Tuber macrosporum	16S	Rhizobiaceae	-	2.4961	CGCGGTAATACGAAGGGGGCTAGCGTTGTTCGGATTTACTGGGCGTAAAGCGCACGTAGGCGGACTATTAAGTCAGGGGTGAAATCCCGGGGCTCAACCCCGGAACTGCCTTTGATACTGGTAGTCTTGAGTTCGAGAGAGGTGAGTGGAATTCCGAGTGTAGAGGTGAAATTCGTAGATATTCGGAGGAACACCAGTGGCGAAGGCGGCTCACTGGCTCGATACTGACGCTGAGGTGCGAAAGCGTGGGGAGCAAACAGGAT
Tuber macrosporum	16S	Saccharimonadaceae	1.07095	-	AAGAACGCAGCGAAATGCGATACGTAATATGAATTGCAGATTTTGTGAATCATCGAATCTTTGAACGCACATTGCGCCCGTGGGTATTCCCGCGGGCATGCGTGTGTGAGCGGTTATCTCCCTCGCAGGTAATGGACATACGGCGTCAGCTGTTCCTCCAAAAAGTGATTGGTGTAGTATTACAGTTTACTCACAACCATACTTTTTCCCTCACACACGTAAGACTACCCGCTGAACTTAAGCATATCAATAAGC
Tuber macrosporum	16S	Yersiniaceae	21.1513	-	CGGGAGGCACCAGCCGCGGTAATACGGAGGGTGCAAGCGTTAATCGGAATTACTGGGCGTAAAGCGCACGCAGGCGGTTTGTTAAGTCAGATGTGAAATCCCCGAGCTTAACTTGGGAACTGCATTTGAAACTGGCAAGCTAGAGTCTTGTAGAGGGGGGTAGAATTCCAGGTGTAGCGGTGAAATGCGTAGAGATCTGGAGGAATACCGGTGGCGAAGGCGGCCCCCTGGACAAAGACTGACGCTCAGGTGCGAAAGCGTGGGGAGCAAACAGGATTAGAAACCCCCGT
Tuber macrosporum	16S	Yersiniaceae	12.5837	-	CGGGAGGCACCAGCCGCGGTAATACGGAGGGTGCAAGCGTTAATCGGAATTACTGGGCGTAAAGCGCACGCAGGCGGTTTGTTAAGTCAGATGTGAAATCCCCGAGCTTAACTTGGGAACTGCATTTGAAACTGGCAAGCTAGAGTCTTGTAGAGGGGGGTAGAATTCCAGGTGTAGCGGTGAAATGCGTAGAGATCTGGAGGAATACCGGTGGCGAAGGCGGCCCCCTGGACAAAGACTGACGCTCAGGTGCGAAAGCGTGGGGAGCAAACAGGATTAGATACCCTAGT
Tuber macrosporum	16S	Dongiaceae	2.05993		CGCGGTAATACGAAGGGGGCTAGCGTTGTTCGGAATTACTGGGCGTAAAGGGCGCGTAGGCGGCCGATTAAGTTAGATGTGAAAGTCCTGGGCTCAACCTGGGGACTGCATTTAATACTGGTTGGCTTGAATTCGGGAGAGGATAGCGGAATTCCCAGTGTAGAGGTGAAATTCGTAGATATTGGGAAGAACACCGGTGGCGAAGGCGGCTATCTGGACCGACATTGACGCTGAGGCGCGAAAGCGTGGGGAGCAAACAGGATT
Tuber macrosporum	16S	Enterobacteriaceae	-	8.24742	GGGGGCAGCAGCCGCGGTAATACGGAGGGTGCAAGCGTTAATCGGAATTACTGGGCGTAAAGCGCACGCAGGCGGTCTGTCAAGTCGGATGTGAAATCCCCGGGCTCAACCTGGGAACTGCATTCGAAACTGGCAGGCTAGAGTCTTGTAGAGGGGGGTAGAATTCCAGGTGTAGCGGTGAAATGCGTAGAGATCTGGAGGAATACCGGTGGCGAAGGCGGCCCCCTGGACAAAGACTGACGCTCAGGTGCGAAAGCGTGGGGAGCAAACAGGATTAGATACCCCAGTA
Tuber macrosporum	16S	Enterobacteriaceae	-	3.96511	GGGGGCAGCAGCCGCGGTAATACGGAGGGTGCAAGCGTTAATCGGAATTACTGGGCGTAAAGCGCACGCAGGCGGTCTGTCAAGTCGGATGTGAAATCCCCGGGCTCAACCTGGGAACTGCATTCGAAACTGGCAGGCTAGAGTCTTGTAGAGGGGGGTAGAATTCCAGGTGTAGCGGTGAAATGCGTAGAGATCTGGAGGAATACCGGTGGCGAAGGCGGCCCCCTGGACAAAGACTGACGCTCAGGTGCGAAAGCGTGGGGAGCAAACAGGATTAGAAACCCCTG
Tuber macrosporum	16S	Lachnospiraceae	53.1835	-	CGCGGTAATACGTAGGGGGCAAGCGTTATCCGGATTTACTGGGTGTAAAGGGAGCGTAGACGGCACTGCAAGTCTGGAGTGAAAGCCCGGGGCTCAACCCCGGGACTGCTTTGGAAACTGTGGTGCTAGAGTGCAGGAGAGGTAAGTGGAATTCCTAGTGTAGCGGTGAAATGCGTAGATATTAGGAGGAACACCAGTGGCGAAGGCGGCTTACTGGACTGTAACTGACGTTGAGGCTCGAAAGCGTGGGGAGCAAACAGGATT
Tuber macrosporum	16S	Lachnospiraceae	4.68165	-	ACTGCTTTGGAAACTGTGGTGCTAGAGTGCAGGAGAGGTAAGTGGAATTCCTAGTGTAGCGGTGAAATGCGTAGATATTAGGAGGAACACCAGTGGCGAAGGCGGCTTACTGGACTGTAACTGACGTTGAGGCTCGAAAGCGTGGGGAGCAAACAGGATTAGATACCCTCGTAGTCCGGTCTGTCTCTTATACACATCTCCGAGCCCACGAGACGGACTCCTATCTCGTATGCCGTCTTCTGCTTGAAAAAAAA
Tuber macrosporum	16S	Lachnospiraceae	0.374532	-	GTACCTGACTAAGAAGCCCCGGCTAACTACGTGCCAGCAGCCGCGGTAATACGTAGGGGGCAAGCGTTATCCGGATTTACTGGGTGTAAAGGGAGCGTAGACGGCACTGCAAGTCTGGAGTGAAAGCCCGGGGCTCAACCCCGGGACTGCTTTGGAAACTGTGGTGCTAGAGTGCAGGAGAGGTAAGTGGAATTCCTAGTGTAGCGGTGAAATGCGTAGATATTAGGAGGAACACCAGTGGCGAAGGCGGCTTACTGGACTGTAACTGACGTTGAGGCTCGAAAGCGTGGGGAGCAAACAGGATT
Tuber macrosporum	16S	Listeriaceae	-	15.8604	GGGGGCAGCAGCCGCGGTAATACGTAGGTGGCAAGCGTTGTCCGGAATTATTGGGCGTAAAGCGCGCGCAGGCGGTCTCTTAAGTCTGATGTGAAAGCCCCCGGCTCAACCGGGGAGGGTCATTGGAAACTGGGAGACTTGAGGACAGAAGAGGAGAGTGGAATTCCAAGTGTAGCGGTGAAATGCGTAGATATTTGGAGGAACACCAGTGGCGAAGGCGGCTCTCTGGTCTGTTACTGACGCTGAGGCGCGAAAGCGTGGGGAGCAAACAGGATTAGATACCCGAGTA
Tuber macrosporum	16S	Mitochondria	16.4794	-	CAGATGTGTATAAGAGACAGTCTGCCTACGGGGGGCACCAGCTAAGATTAAAATGCAACCAAGCTGTCATAAGCCTAAGATCCACCTAAACCCAACCCAAATCCATCTTAGCCTCAACGATTAATTTTAACCCACGAAAGCTAGGACCCAAACTGGGATTAGAAACCCTGGTAGTCCGGTCTGTCTCTTATACAATCTCC
Tuber macrosporum	16S	Mitochondria	-	0.793021	AAGAACGCAGCGAAACGCGATATTTCTTGTGAATTGCAGAAGTGAATCATCAGTTTTTGAACGCACATTGCACTTTGGGGTATCCCCCAAAGTATACTTGTTTGAGCGTTGTTTCTCTCTTGGAATTGCTTTGCTCTTCTAAAATTTCGAATCAAATTCGTTTGAAAAACAACACTATTCAACCTCAGATCAAGTAGGATTACCCGCTGAACTTAAGCATATCAATAAGC
Tuber macrosporum	16S	Mycobacteriaceae	3.37079	-	CGCGGTAATACGTAGGGTCCGAGCGTTGTCCGGAATTACTGGGCGTAAAGAGCTCGTAGGTGGTTTGTCGCGTTGTTCGTGAAAACTCACAGCTCAACTGTGGGCGTGCGGGCGATACGGGCAGACTAGAGTACTGCAGGGGAGACTGGAATTCCTGGTGTAGCGGTGGAATGCGCAGATATCAGGAGGAACACCGGTGGCGAAGGCGGGTCTCTGGGCAGTAACTGACGCTGAGGAGCGAAAGCGTGGGGAGCGAACAGGAT
Tuber macrosporum	16S	Saccharimonadaceae	-	1.42744	AAGAACGCAGCGAAATGCGATACGTAATATGAATTGCAGATTTTGTGAATCATCGAATCTTTGAACGCACATTGCGCCCGTGGGTATTCCCGCGGGCATGCGTGTGTGAGCGGTTATCTCCCTCGCAGGTAATGGACATACGGCGTCAGCTGTTCCTCCAAAAAGTGATTGGTGTAGTATTACAGTTTACTCACAACCATACTTTTTCCCTCACACACGTAAGACTACCCGCTGAACTTAAGCATATCAATAAGC
Tuber macrosporum	16S	Nocardioidaceae	10.1124	-	CGCGGTAATACGTAGGGTCCGAGCGTTGTCCGGAATTATTGGGCGTAAAGGGCTCGTAGGCGGTCTGTCGCGTCGGGAGTGAAAACCAGGTGCTTAACACCTGGCCTGCTTTCGATACGGGCAGACTAGAGGTACTCAGGGGAGAATGGAATTCCTGGTGTAGCGGTGAAATGCGCAGATATCAGGAGGAACACCGGTGGCGAAGGCGGTTCTCTGGGAGTATCCTGACGCTGAGGAGCGAAAGTGTGGGGAGCGAACAGGATTA
Tuber macrosporum	16S	Paenibacillaceae	1.31086	-	CGCGGTAATACGTAGGGGGCAAGCGTTGTCCGGAATTATTGGGCGTAAAGCGCGCGCAGGCGGCTATTTAAGTCTGGTGTTTAAACCTTGGGCTCAACCTGAGGTCGCACTGGAAACTGGGTGGCTTGAGTACAGAAGAGGAAAGTGGAATTCCACGTGTAGCGGTGAAATGCGTAGATATGTGGAGGAACACCAGTGGCGAAGGCGACTTTCTGGGCTGTAACTGACGCTGAGGCGCGAAAGCGTGGGGAGCAAACAGGAT
Tuber macrosporum	16S	Rhizobiaceae	3.74532	-	CGCGGTAATACGAAGGGGGCTAGCGTTGTTCGGAATTACTGGGCGTAAAGCGCACGTAGGCGGATCGATCAGTCAGGGGTGAAATCCCGCAGCTCAACTGCGGAACTGCCTTTGATACTGTCGATCTAGAGTATGGAAGAGGTGAGTGGAATTCCGAGTGTAGAGGTGAAATTCGTAGATATTCGGAGGAACACCAGTGGCGAAGGCGGCTCACTGGTCCATTACTGACGCTGAGGTGCGAAAGCGTGGGGAGCAAACAGGATT
Tuber macrosporum	16S	Xanthobacteraceae	4.68165	-	CGCGGTAATACGTAGGGGGCAAGCGTTATCCGGATTTACTGGGTGTAAAGGGAGCGTAGACGGCACTGCAAGTCTGGAGTGAAATCCTGGAGCTCAACTCCAGAACTGCCTTTGATACTGAAGATCTTGAGTTCGGGAGAGGTGAGTGGAACTGCGAGTGTAGAGGTGAAATTCGTAGATATTCGCAAGAACACCAGTGGCGAAGGCGGCTCACTGGCCCGATACTGACGCTGAGGCACGAAAGCGTGGGGAGCAAACAGGATT
Tuber macrosporum	16S	Xanthobacteraceae	-	8.96114	GGGGTGCAGCAGCCGCGGTAATACGAAGGGGGCTAGCGTTGCTCGGAATCACTGGGCGTAAAGGGTGCGTAGGCGGGTCTTTAAGTCAGGGGTGAAATCCTGGAGCTCAACTCCAGAACTGCCTTTGATACTGAAGATCTTGAGTTCGGGAGAGGTGAGTGGAACTGCGAGTGTAGAGGTGAAATTCGTAGATATTCGCAAGAACACCAGTGGCGAAGGCGGCTCACTGGCCCGATACTGACGCTGAGGCACGAAAGCGTGGGGAGCAAACAGGATTAGAAACCCCCGTA
Tuber macrosporum	16S	Xanthobacteraceae	-	3.8858	GGGGTGCAGCAGCCGCGGTAATACGAAGGGGGCTAGCGTTGCTCGGAATCACTGGGCGTAAAGGGTGCGTAGGCGGGTCTTTAAGTCAGGGGTGAAATCCTGGAGCTCAACTCCAGAACTGCCTTTGATACTGAAGATCTTGAGTTCGGGAGAGGTGAGTGGAACTGCGAGTGTAGAGGTGAAATTCGTAGATATTCGCAAGAACACCAGTGGCGAAGGCGGCTCACTGGCCCGATACTGACGCTGAGGCACGAAAGCGTGGGGAGCAAACAGGATTAGATACCCTCGT
Tuber macrosporum	16S	Xanthomonadaceae	-	3.25139	GGTCGCAGCAGCCGCGGTAATACGAAGGGTGCAAGCGTTACTCGGAATTACTGGGCGTAAAGCGTGCGTAGGTGGTTGTTTAAGTCTGTTGTGAAAGCCCTGGGCTCAACCTGGGAATTGCAGTGGATACTGGGCGACTAGAGTGTGGTAGAGGGTAGTGGAATTCCCGGTGTAGCAGTGAAATGCGTAGAGATCGGGAGGAACATCCATGGCGAAGGCAGCTACCTGGACCAACACTGACACTGAGGCACGAAAGCGTGGGGAGCAAACAGGATTAGAAACCCGCGTA
Tuber macrosporum	16S	Yersiniaceae	-	13.0056	GGGGGCAGCAGCCGCGGTAATACGGAGGGTGCAAGCGTTAATCGGAATTACTGGGCGTAAAGCGCACGCAGGCGGTTTGTTAAGTCAGATGTGAAATCCCCGCGCTTAACGTGGGAACTGCATTTGAAACTGGCAAGCTAGAGTCTTGTAGAGGGGGGTAGAATTCCAGGTGTAGCGGTGAAATGCGTAGAGATCTGGAGGAATACCGGTGGCGAAGGCGGCCCCCTGGACAAAGACTGACGCTCAGGTGCGAAAGCGTGGGGAGCAAACAGGATTAGAAACCCCCG
Tuber macrosporum	16S	Yersiniaceae	-	8.80254	GGGGGCAGCAGCCGCGGTAATACGGAGGGTGCAAGCGTTAATCGGAATTACTGGGCGTAAAGCGCACGCAGGCGGTTTGTTAAGTCAGATGTGAAATCCCCGCGCTTAACGTGGGAACTGCATTTGAAACTGGCAAGCTAGAGTCTTGTAGAGGGGGGTAGAATTCCAGGTGTAGCGGTGAAATGCGTAGAGATCTGGAGGAATACCGGTGGCGAAGGCGGCCCCCTGGACAAAGACTGACGCTCAGGTGCGAAAGCGTGGGGAGCAAACAGGATTAGATACCCTTGTA
Tuber macrosporum	16S	Yersiniaceae	-	8.72324	GGGGGCAGCAGCCGCGGTAATACGGAGGGTGCAAGCGTTAATCGGAATTACTGGGCGTAAAGCGCACGCAGGCGGTTTGTTAAGTCAGATGTGAAATCCCCGCGCTTAACGTGGGAACTGCATTTGAAACTGGCAAGCTAGAGTCTTGTAGAGGGGGGTAGAATTCCAGGTGTAGCGGTGAAATGCGTAGAGATCTGGAGGAATACCGGTGGCGAAGGCGGCCCCCTGGACAAAGACTGACGCTCAGGTGCGAAAGCGTGGGGAGCAAACAGGATTAGAAACCCTAGT
Tuber macrosporum	16S	Yersiniaceae	-	6.89929	GGGGGCAGCAGCCGCGGTAATACGGAGGGTGCAAGCGTTAATCGGAATTACTGGGCGTAAAGCGCACGCAGGCGGTTTGTTAAGTCAGATGTGAAATCCCCGCGCTTAACGTGGGAACTGCATTTGAAACTGGCAAGCTAGAGTCTTGTAGAGGGGGGTAGAATTCCAGGTGTAGCGGTGAAATGCGTAGAGATCTGGAGGAATACCGGTGGCGAAGGCGGCCCCCTGGACAAAGACTGACGCTCAGGTGCGAAAGCGTGGGGAGCAAACAGGATTAGATACCCCAGTA
Tuber macrosporum	16S	Yersiniaceae	-	4.83743	GGGGGCAGCAGCCGCGGTAATACGGAGGGTGCAAGCGTTAATCGGAATTACTGGGCGTAAAGCGCACGCAGGCGGTTTGTTAAGTCAGATGTGAAATCCCCGCGCTTAACGTGGGAACTGCATTTGAAACTGGCAAGCTAGAGTCTTGTAGAGGGGGGTAGAATTCCAGGTGTAGCGGTGAAATGCGTAGAGATCTGGAGGAATACCGGTGGCGAAGGCGGCCCCCTGGACAAAGACTGACGCTCAGGTGCGAAAGCGTGGGGAGCAAACAGGATTAGATACCCCTGTA
Tuber macrosporum	16S	Yersiniaceae	-	4.83743	GGGGGCAGCAGCCGCGGTAATACGGAGGGTGCAAGCGTTAATCGGAATTACTGGGCGTAAAGCGCACGCAGGCGGTTTGTTAAGTCAGATGTGAAATCCCCGCGCTTAACGTGGGAACTGCATTTGAAACTGGCAAGCTAGAGTCTTGTAGAGGGGGGTAGAATTCCAGGTGTAGCGGTGAAATGCGTAGAGATCTGGAGGAATACCGGTGGCGAAGGCGGCCCCCTGGACAAAGACTGACGCTCAGGTGCGAAAGCGTGGGGAGCAAACAGGATTAGATACCCGCGT
Tuber macrosporum	16S	Yersiniaceae	-	4.52022	GGGGGCAGCAGCCGCGGTAATACGGAGGGTGCAAGCGTTAATCGGAATTACTGGGCGTAAAGCGCACGCAGGCGGTTTGTTAAGTCAGATGTGAAATCCCCGCGCTTAACGTGGGAACTGCATTTGAAACTGGCAAGCTAGAGTCTTGTAGAGGGGGGTAGAATTCCAGGTGTAGCGGTGAAATGCGTAGAGATCTGGAGGAATACCGGTGGCGAAGGCGGCCCCCTGGACAAAGACTGACGCTCAGGTGCGAAAGCGTGGGGAGCAAACAGGATTAGAAACCCGTGT
Tuber macrosporum	16S	Yersiniaceae	-	0.793021	GGGCGCAGCAGGCGGTTTGTTAAGTCAGATGTGAAATCCCCGCGCTTAACGTGGGAACTGCATTTGAAACTGGCAAGCTAGAGTCTTGTAGAGGGGGGTAGAATTCCAGGTGTAGCGGTGAAATGCGTAGAGATCTGGAGGAATACCGGTGGCGAAGGCGGCCCCCTGGACAAAGACTGACGCTCAGGTGCGAAAGCGTGGGGAGCAAACAGGATTAGAAACCCCCG
Tuber macrosporum	16S	Yersiniaceae	-	0.634417	GGGCGCAGCAGGCGGTTTGTTAAGTCAGATGTGAAATCCCCGCGCTTAACGTGGGAACTGCATTTGAAACTGGCAAGCTAGAGTCTTGTAGAGGGGGGTAGAATTCCAGGTGTAGCGGTGAAATGCGTAGAGATCTGGAGGAATACCGGTGGCGAAGGCGGCCCCCTGGACAAAGACTGACGCTCAGGTGCGAAAGCGTGGGGAGCAAACAGGATTAGATACCCTTGTA
Tuber macrosporum	16S	Yersiniaceae	-	0.555115	GGGCGCAGCAGGCGGTTTGTTAAGTCAGATGTGAAATCCCCGCGCTTAACGTGGGAACTGCATTTGAAACTGGCAAGCTAGAGTCTTGTAGAGGGGGGTAGAATTCCAGGTGTAGCGGTGAAATGCGTAGAGATCTGGAGGAATACCGGTGGCGAAGGCGGCCCCCTGGACAAAGACTGACGCTCAGGTGCGAAAGCGTGGGGAGCAAACAGGATTAGATACCCCCGTA
Tuber macrosporum	16S	Anaplasmataceae	0.711148	-	CGGGGCGCAGCAGAGGCGAGTGGCATTCAAAATCTAGCTATTAGGGGTATTGTTTAGTGGTATAACTTCGCGCTAGATATAAACTACACCTAAAGGGGATTGGGAACTCAGGGGGCACCGAGTAGGTGCCTGGTTCGGGGTACACTCGCATACTGGCACAGGGGTTACCTTGCAGAATACCAGATATTGAGATATAGAAACAAGGGGATTAGAAACCCTGGT
Tuber macrosporum	16S	Beggiatoaceae	0.418323	-	AAGAACGCAGCGAAATGCGATACGTAGTACGAAACGCAAGTCGTGAATCATCGAATCTTTGAACGCACATTGCGCTGCGGGGCATTCCCCGCAGCATGCCTGTTTGAGCGTCCTTTCTCTCTCGAAAGGTTGTGGGCGGTATGCTGGTAAGCATCCGCCTGAAAGGTAATCGTCACGACTGTCAAGTAAGTCGCAGACTAACCAATATCGACCTCAAATCAGGTAGGACTACCCGCTGAACTTAAGCATATCAATAAGC
Tuber macrosporum	16S	Beggiatoaceae	0.585652	-	AAGAACGCAGCGAAATGCGATACGTAGTACGAAACGCAAGTCGTGAATCATCGAATCTTTGAACGCACATTGCGCTGCGAGGCATTCCTCGCAGCATGCCTGTTTGAGCGTCCTTTCTCTCTCGAAAGGTTGTGGGTGGCACGCTGGTAAGCGTCCGTCTGAAAGGTAACCGTCACGACTGTCAAGTAAGTCGCCGACTAACCACTTTTGACCTCAAATCAGGTAGGACTACCCGCTGAACTTAAGCATATCAATAAGC
Tuber macrosporum	16S	Desulfurobacteriaceae	0.104581	-	AAGAACGCAGCGAAATGCGATAGGTAATGTGAATCGCAGAACTCAGTGAATCATCGAATCTTTGAACGCACATTGCGCCCTGGGGCATTCCTCAGGGCATGCCTGTCCGAGCGTCAGTGCAAACCACCTCACGGAACACGTGGTGCTGGCGGAGGTGGCGTCGGATCAGGTAGGGATACCCGCTGAACTTAAGCATATCAATAAGC
Tuber macrosporum	16S	Mitochondria	0.146413	-	AAGAACGCAGCGAAATGCGATAGGTAATGTGAATCGCAGAACTCAGTGAATCATCGAATCTTTGAACGCACATTGCACTTTGGGGTATCCCCCAAAGTATACTTGTTTGAGCGTTGTTTCTCTCTTGGAATTGCTTTGCTCTTCTAAAATTTCGAATCAAATTCGTTTGAAAAACAACACTATTCAACCTCAGATCAAGTAGGATTACCCGCTGAACTTAAGCATATCAATAAGC
Tuber macrosporum	16S	Mitochondria	0.481071	-	CGGGGCGCAGCAGCAGATACGGTTGCAACAGAAGGCTTGATTAATGTCGGTGAAAATTTACAGTTGTCTTATTACTTTGGGACTAAAATTGGTTCTAATCCAGGTGACAGGCTACAAGTAGCTAATGTAAATATCAAAGATAATGGAAAAGTTGTGCAACATTTGTACGGAAATGGTAGCAACACAGGTTACATTTTAATGGGTTTTGATGGAAAAGAGACGAGCTTTGCTAACCAAAAGCCAAGTAATATGCAAATAAAATCGATTACTGGTAGTGGATTAGATACCCCCGTA
Tuber macrosporum	16S	Mitochondria	-	27.7666	AAGAACGCAGCGAAACGCGATATTTCTTGTGAATTGCAGAAGTGAATCATCAGTTTTTGAACGCACATTGCACTTTGGGGTATCCCCCAAAGTATACTTGTTTGAGCGTTGTTTCTCTCTTGGAATTGCTTTGCTCTTCTAAAATTTCGAATCAAATTCGTTTGAAAAACAACACTATTCAACCTCAGATCAAGTAGGATTACCCGCTGAACTTAAGCATATCAATAAGC
Tuber macrosporum	16S	Mitochondria	90.525	-	AAGAACGCAGCGAAACGCGATATTTCTTGTGAATTGCAGAAGTGAATCATCAGTTTTTGAACGCACATTGCACTTTGGGGTATCCCCCAAAGTATACTTGTTTGAGCGTTGTTTCTCTCTTGGAATTGCTTTGCTCTTCTAAAATTTCGAATCAAATTCGTTTGAAAAACAACACTATTCAACCTCAGATCAAGTAGGATTACCCGCTGAACTTAAGCATATCAATAAGC
Tuber macrosporum	16S	Mitochondria	-	41.2475	GGGGGCAGCAGAGGCGAGTGGCATTCAAAATCTAGCTATTAGGGGTATTGTTTAGTGGTATAACTTCGCGCTAGATATAAACTACACCTAAAGGGGATTGGGAACTCAGGGGGCACCGAGTAGGTGCCTGGTTCGGGGTACACTCGCATACTGGCACAGGGGTTACCTTGCAGAATACCAGATATTGAGATATAGAAACAAGGGGATTAGATACCCCCGTA
Tuber macrosporum	16S	Mitochondria	-	1.60966	AAGAACGCAGCGAAATGCGATACGTAATATGAATTGCAGATTTTGTGAATCATCGAATCTTTGAACGCACATTGCGCCCGTGGGTATTCCCGCGGGCATGCGTGTGTGAGCGGTTATCTCCCTCGCAGGTAATGGACATACGGCGTCAGCTGTTCCTCCAAAAAGTGATTGGTGTAGTATTACAGTTTACTCACAACCATACTTTTTCCCTCACACACGTAAGACTACCCGCTGAACTTAAGCATATCAATAAGC
Tuber macrosporum	16S	Pectobacteriaceae	0.460155	-	CGGGACGCACCAGCCGCGGTAATACGGAGGGTGCAAGCGTTAATCGGAATTACTGGGCGTAAAGCGCACGCAGGCGGTTTGTTAAGTCAGATGTGAAATCCCCGAGCTTAACTTGGGAACTGCATTTGAAACTGGCAAGCTAGAGTCTTGTAGAGGGGGGTAGAATTCCAGGTGTAGCGGTGAAATGCGTAGAGATCTGGAGGAATACCGGTGGCGAAGGCGGCCCCCTGGACAAAGACTGACGCTCAGGTGCGAAAGCGTGGGGAGCAAACAGGATTAGAAACCCGCG
Tuber macrosporum	16S	Pectobacteriaceae	0.501987	-	CGGGACGCACCAGCCGCGGTAATACGGAGGGTGCAAGCGTTAATCGGAATTACTGGGCGTAAAGCGCACGCAGGCGGTTTGTTAAGTCAGATGTGAAATCCCCGAGCTTAACTTGGGAACTGCATTTGAAACTGGCAAGCTAGAGTCTTGTAGAGGGGGGTAGAATTCCAGGTGTAGCGGTGAAATGCGTAGAGATCTGGAGGAATACCGGTGGCGAAGGCGGCCCCCTGGACAAAGACTGACGCTCAGGTGCGAAAGCGTGGGGAGCAAACAGGATTAGATACCCCAGTA
Tuber macrosporum	16S	Pectobacteriaceae	-	5.23139	GGTGGCAGCAGCCGCGGTAATACGGAGGGTGCAAGCGTTAATCGGAATTACTGGGCGTAAAGCGCACGCAGGCGGTTTGTTAAGTCAGATGTGAAATCCCCGAGCTTAACTTGGGAACTGCATTTGAAACTGGCAAGCTAGAGTCTTGTAGAGGGGGGTAGAATTCCAGGTGTAGCGGTGAAATGCGTAGAGATCTGGAGGAATACCGGTGGCGAAGGCGGCCCCCTGGACAAAGACTGACGCTCAGGTGCGAAAGCGTGGGGAGCAAACAGGATTAGATACCCGCGT
Tuber macrosporum	16S	Pectobacteriaceae	-	5.03018	GGTGGCAGCAGCCGCGGTAATACGGAGGGTGCAAGCGTTAATCGGAATTACTGGGCGTAAAGCGCACGCAGGCGGTTTGTTAAGTCAGATGTGAAATCCCCGAGCTTAACTTGGGAACTGCATTTGAAACTGGCAAGCTAGAGTCTTGTAGAGGGGGGTAGAATTCCAGGTGTAGCGGTGAAATGCGTAGAGATCTGGAGGAATACCGGTGGCGAAGGCGGCCCCCTGGACAAAGACTGACGCTCAGGTGCGAAAGCGTGGGGAGCAAACAGGATTAGAAACCCTTGT
Tuber macrosporum	16S	Pectobacteriaceae	-	4.62777	GGTGGCAGCAGCCGCGGTAATACGGAGGGTGCAAGCGTTAATCGGAATTACTGGGCGTAAAGCGCACGCAGGCGGTTTGTTAAGTCAGATGTGAAATCCCCGAGCTTAACTTGGGAACTGCATTTGAAACTGGCAAGCTAGAGTCTTGTAGAGGGGGGTAGAATTCCAGGTGTAGCGGTGAAATGCGTAGAGATCTGGAGGAATACCGGTGGCGAAGGCGGCCCCCTGGACAAAGACTGACGCTCAGGTGCGAAAGCGTGGGGAGCAAACAGGATTAGAAACCCTCGT
Tuber macrosporum	16S	Pectobacteriaceae	-	3.82294	GGTGGCAGCAGCCGCGGTAATACGGAGGGTGCAAGCGTTAATCGGAATTACTGGGCGTAAAGCGCACGCAGGCGGTTTGTTAAGTCAGATGTGAAATCCCCGAGCTTAACTTGGGAACTGCATTTGAAACTGGCAAGCTAGAGTCTTGTAGAGGGGGGTAGAATTCCAGGTGTAGCGGTGAAATGCGTAGAGATCTGGAGGAATACCGGTGGCGAAGGCGGCCCCCTGGACAAAGACTGACGCTCAGGTGCGAAAGCGTGGGGAGCAAACAGGATTAGAAACCCTAG
Tuber macrosporum	16S	Pectobacteriaceae	-	3.82294	GGTGGCAGCAGCCGCGGTAATACGGAGGGTGCAAGCGTTAATCGGAATTACTGGGCGTAAAGCGCACGCAGGCGGTTTGTTAAGTCAGATGTGAAATCCCCGAGCTTAACTTGGGAACTGCATTTGAAACTGGCAAGCTAGAGTCTTGTAGAGGGGGGTAGAATTCCAGGTGTAGCGGTGAAATGCGTAGAGATCTGGAGGAATACCGGTGGCGAAGGCGGCCCCCTGGACAAAGACTGACGCTCAGGTGCGAAAGCGTGGGGAGCAAACAGGATTAGATACCCTCGTA
Tuber macrosporum	16S	Pectobacteriaceae	-	3.42052	GGTGGCAGCAGCCGCGGTAATACGGAGGGTGCAAGCGTTAATCGGAATTACTGGGCGTAAAGCGCACGCAGGCGGTTTGTTAAGTCAGATGTGAAATCCCCGAGCTTAACTTGGGAACTGCATTTGAAACTGGCAAGCTAGAGTCTTGTAGAGGGGGGTAGAATTCCAGGTGTAGCGGTGAAATGCGTAGAGATCTGGAGGAATACCGGTGGCGAAGGCGGCCCCCTGGACAAAGACTGACGCTCAGGTGCGAAAGCGTGGGGAGCAAACAGGATTAGAAACCCCAGTA
Tuber macrosporum	16S	Pectobacteriaceae	-	3.42052	GGTGGCAGCAGCCGCGGTAATACGGAGGGTGCAAGCGTTAATCGGAATTACTGGGCGTAAAGCGCACGCAGGCGGTTTGTTAAGTCAGATGTGAAATCCCCGAGCTTAACTTGGGAACTGCATTTGAAACTGGCAAGCTAGAGTCTTGTAGAGGGGGGTAGAATTCCAGGTGTAGCGGTGAAATGCGTAGAGATCTGGAGGAATACCGGTGGCGAAGGCGGCCCCCTGGACAAAGACTGACGCTCAGGTGCGAAAGCGTGGGGAGCAAACAGGATTAGAAACCCCCG
Tuber macrosporum	16S	Saccharimonadaceae	3.45116	-	AAGAACGCAGCGAAATGCGATACGTAATATGAATTGCAGATTTTGTGAATCATCGAATCTTTGAACGCACATTGCGCCCGTGGGTATTCCCGCGGGCATGCGTGTGTGAGCGGTTATCTCCCTCGCAGGTAATGGACATACGGCGTCAGCTGTTCCTCCAAAAAGTGATTGGTGTAGTATTACAGTTTACTCACAACCATACTTTTTCCCTCACACACGTAAGACTACCCGCTGAACTTAAGCATATCAATAAGC
Tuber macrosporum	16S	Vagococcaceae	0.501987	-	GGGGGCAGCAGCCGCGGTAATACGTAGGTGGCAAGCGTTGTCCGGATTTATTGGGCGTAAAGCGAGCGCAGGTGGTTTCTTAAGTCTGATGTGAAAGCCCCCGGCTCAACCGGGGAGGGTCATTGGAAACTGGGAGACTTGAGTGCAGAAGAGGAGAGTGGAATTCCATGTGTAGCGGTGAAATGCGTAGATATATGGAGGAACACCAGTGGCGAAGGCGACTCTCTGGTCTGTAACTGACACTGAGGCTCGAAAGCGTGGGGAGCAAACAGGATTAGAAACCCCCG
Tuber macrosporum	16S	Xanthobacteraceae	0.209161	-	GGGACGCAGCAGGAAAGGACGGAACGGGGAGCACCAATCACGGTGCATGTGAATTGGGAGTCTGTCATCGTGCGGACTGCAGGTGCAGGTGCTTACCTCGTGAGACTGCTTCCCAATGCAACTTACCTGGCCCCCACATCCGATAAACGTAACACAGCAATCACTACCAAGTGGAACAGCAGCGAAACAAATACCATATCTAGTCGGGATTAGAAACCCCTGTA
Tuber macrosporum	16S	Xanthobacteraceae	0.209161	-	GGGACGCAGCAGCCGCGGTAATACGAAGGGGGCTAGCGTTGCTCGGAATCACTGGGCGTAAAGGGTGCGTAGGCGGGTCTTTAAGTCAGGGGTGAAATCCTGGAGCTCAACTCCAGAACTGCCTTTGATACTGAAGATCTTGAGTTCGGGAGAGGTGAGTGGAACTGCGAGTGTAGAGGTGAAATTCGTAGATATTCGCAAGAACACCAGTGGCGAAGGCGGCTCACTGGCCCGATACTGACGCTGAGGCACGAAAGCGTGGGGAGCAAACAGGATTAGATACCCCTGTA
Tuber macrosporum	16S	Xanthobacteraceae	0.209161	-	GGGACGCAGCAGCCGCGGTAATACGAAGGGGGCTAGCGTTGCTCGGAATCACTGGGCGTAAAGGGTGCGTAGGCGGGTCTTTAAGTCAGGGGTGAAATCCTGGAGCTCAACTCCAGAACTGCCTTTGATACTGAAGATCTTGAGTTCGGGAGAGGTGAGTGGAACTGCGAGTGTAGAGGTGAAATTCGTAGATATTCGCAAGAACACCAGTGGCGAAGGCGGCTCACTGGCCCGATACTGACGCTGAGGCACGAAAGCGTGGGGAGCAAACAGGATTAGAAACCCTAGTA
Tuber macrosporum	16S	Xanthobacteraceae	0.209161	-	GGGACGCAGCAGCCGCGGTAATACGAAGGGGGCTAGCGTTGCTCGGAATCACTGGGCGTAAAGGGTGCGTAGGCGGGTCTTTAAGTCAGGGGTGAAATCCTGGAGCTCAACTCCAGAACTGCCTTTGATACTGAAGATCTTGAGTTCGGGAGAGGTGAGTGGAACTGCGAGTGTAGAGGTGAAATTCGTAGATATTCGCAAGAACACCAGTGGCGAAGGCGGCTCACTGGCCCGATACTGACGCTGAGGCACGAAAGCGTGGGGAGCAAACAGGATTAGATACCCTAGTA
Tuber macrosporum	16S	Xanthobacteraceae	0.230077	-	GGGACGCAGCAGCCGCGGTAATACGAAGGGGGCTAGCGTTGCTCGGAATCACTGGGCGTAAAGGGTGCGTAGGCGGGTCTTTAAGTCAGGGGTGAAATCCTGGAGCTCAACTCCAGAACTGCCTTTGATACTGAAGATCTTGAGTTCGGGAGAGGTGAGTGGAACTGCGAGTGTAGAGGTGAAATTCGTAGATATTCGCAAGAACACCAGTGGCGAAGGCGGCTCACTGGCCCGATACTGACGCTGAGGCACGAAAGCGTGGGGAGCAAACAGGATTAGATACCCCAGTA
Tuber macrosporum	16S	Xanthobacteraceae	0.230077	-	GGGACGCAGCAGCCGCGGTAATACGAAGGGGGCTAGCGTTGCTCGGAATCACTGGGCGTAAAGGGTGCGTAGGCGGGTCTTTAAGTCAGGGGTGAAATCCTGGAGCTCAACTCCAGAACTGCCTTTGATACTGAAGATCTTGAGTTCGGGAGAGGTGAGTGGAACTGCGAGTGTAGAGGTGAAATTCGTAGATATTCGCAAGAACACCAGTGGCGAAGGCGGCTCACTGGCCCGATACTGACGCTGAGGCACGAAAGCGTGGGGAGCAAACAGGATTAGATACCCTCGT
Tuber macrosporum	16S	Xanthobacteraceae	0.230077	-	GGGACGCAGCAGCCGCGGTAATACGAAGGGGGCTAGCGTTGCTCGGAATCACTGGGCGTAAAGGGTGCGTAGGCGGGTCTTTAAGTCAGGGGTGAAATCCTGGAGCTCAACTCCAGAACTGCCTTTGATACTGAAGATCTTGAGTTCGGGAGAGGTGAGTGGAACTGCGAGTGTAGAGGTGAAATTCGTAGATATTCGCAAGAACACCAGTGGCGAAGGCGGCTCACTGGCCCGATACTGACGCTGAGGCACGAAAGCGTGGGGAGCAAACAGGATTAGAAACCCGCG
Tuber macrosporum	16S	Xanthobacteraceae	0.27191	-	GGGACGCAGCAGCCGCGGTAATACGAAGGGGGCTAGCGTTGCTCGGAATCACTGGGCGTAAAGGGTGCGTAGGCGGGTCTTTAAGTCAGGGGTGAAATCCTGGAGCTCAACTCCAGAACTGCCTTTGATACTGAAGATCTTGAGTTCGGGAGAGGTGAGTGGAACTGCGAGTGTAGAGGTGAAATTCGTAGATATTCGCAAGAACACCAGTGGCGAAGGCGGCTCACTGGCCCGATACTGACGCTGAGGCACGAAAGCGTGGGGAGCAAACAGGATTAGAAACCCCCG
Tuber macrosporum	16S	Xanthobacteraceae	0.313742	-	GGGACGCAGCAGCCGCGGTAATACGAAGGGGGCTAGCGTTGCTCGGAATCACTGGGCGTAAAGGGTGCGTAGGCGGGTCTTTAAGTCAGGGGTGAAATCCTGGAGCTCAACTCCAGAACTGCCTTTGATACTGAAGATCTTGAGTTCGGGAGAGGTGAGTGGAACTGCGAGTGTAGAGGTGAAATTCGTAGATATTCGCAAGAACACCAGTGGCGAAGGCGGCTCACTGGCCCGATACTGACGCTGAGGCACGAAAGCGTGGGGAGCAAACAGGATTAGAAACCCTCGT
Tuber magnatum	16S	Beijerinckiaceae	5.15152	-	GGAGGCAGCAGCCGCGGTAATACGAAGGGGGCTAGCGTTGCTCGGAATCACTGGGCGTAAAGGGCGCGTAGGCGGACTCTTAAGTCGGGGGTGAAAGCCCAGGGCTCAACCCTGGAATTGCCTTCGATACTGAGAGTCTTGAGTTCGGAAGAGGTTGGTGGAACTGCGAGTGTAGAGGTGAAATTCGTAGATATTCGCAAGAACACCAGTGGCGAAGGCGGCCAACTGGTCCGATACTGACGCTGAGGCGCGAAAGCGTGGGGAGCAAACAGGATTAGAAACCCCCG
Tuber magnatum	16S	Clostridiaceae	0.833333	-	GGTGGCAGCAGCCGCGGTAATACGTAGGTGGCAAGCGTTGTCCGGATTTACTGGGCGTAAAGGATGCGTAGGCGGACATTTAAGTCAGATGTGAAATACCCGAGCTTAACTTGGGTGCTGCATTTGAAACTGGGTGTCTAGAGTGCAGGAGAGGTAAGTGGAATTCCTAGTGTAGCGGTGAAATGCGTAGAGATTAGGAAGAACACCAGTGGCGAAGGCGACTTACTGGACTGTAACTGACGCTGAGGCATGAAAGCGTGGGGAGCAAACAGGATTAGATACCCCCGTA
Tuber magnatum	16S	Enterobacteriaceae	8.56061	-	GGTGGCAGCAGCCGCGGTAATACGGAGGGTGCAAGCGTTAATCGGAATTACTGGGCGTAAAGCGCACGCAGGCGGTCTGTCAAGTCGGATGTGAAATCCCCGGGCTCAACCTGGGAACTGCATTCGAAACTGGCAGGCTAGAGTCTTGTAGAGGGGGGTAGAATTCCAGGTGTAGCGGTGAAATGCGTAGAGATCTGGAGGAATACCGGTGGCGAAGGCGGCCCCCTGGACAAAGACTGACGCTCAGGTGCGAAAGCGTGGGGAGCAAACAGGATTAGAAACCCCCG
Tuber magnatum	16S	Enterobacteriaceae	6.81818	-	GGTGGCAGCAGCCGCGGTAATACGGAGGGTGCAAGCGTTAATCGGAATTACTGGGCGTAAAGCGCACGCAGGCGGTCTGTCAAGTCGGATGTGAAATCCCCGGGCTCAACCTGGGAACTGCATTCGAAACTGGCAGGCTAGAGTCTTGTAGAGGGGGGTAGAATTCCAGGTGTAGCGGTGAAATGCGTAGAGATCTGGAGGAATACCGGTGGCGAAGGCGGCCCCCTGGACAAAGACTGACGCTCAGGTGCGAAAGCGTGGGGAGCAAACAGGATTAGATACCCTTGTA
Tuber magnatum	16S	Listeriaceae	3.0303	-	GGTGGCAGCAGCCGCGGTAATACGTAGGTGGCAAGCGTTGTCCGGAATTATTGGGCGTAAAGCGCGCGCAGGCGGTCTCTTAAGTCTGATGTGAAAGCCCCCGGCTCAACCGGGGAGGGTCATTGGAAACTGGGAGACTTGAGGACAGAAGAGGAGAGTGGAATTCCAAGTGTAGCGGTGAAATGCGTAGATATTTGGAGGAACACCAGTGGCGAAGGCGGCTCTCTGGTCTGTTACTGACGCTGAGGCGCGAAAGCGTGGGGAGCAAACAGGATTAGAAACCCCCGTA
Tuber magnatum	16S	Mitochondria	-	24.2502	AAGAACGCAGCGAAACGCGATATTTCTTGTGAATTGCAGAAGTGAATCATCAGTTTTTGAACGCACATTGCACTTTGGGGTATCCCCCAAAGTATACTTGTTTGAGCGTTGTTTCTCTCTTGGAATTGCTTTGCTCTTCTAAAATTTCGAATCAAATTCGTTTGAAAAACAACACTATTCAACCTCAGATCAAGTAGGATTACCCGCTGAACTTAAGCATATCAATAAGC
Tuber magnatum	16S	Mitochondria	-	2.61646	AAGAACGCAGCGAAATGCGATAGGTAATGTGAATTGCAGAAGTGAATCATCAGTTTTTGAACGCACATTGCACTTTGGGGTATCCCCCAAAGTATACTTGTTTGAGCGTTGTTTCTCTCTTGGAATTGCTTTGCTCTTCTAAAATTTCGAATCAAATTCGTTTGAAAAACAACACTATTCAACCTCAGATCAAGTAGGATTACCCGCTGAACTTAAGCATATCAATAAGC
Tuber magnatum	16S	Mitochondria	-	1.08488	CGGGACGCAGCAGCAGATACGGTTGCAACAGAAGGCTTGATTAATGTCGGTGAAAATTTACAGTTGTCTTATTACTTTGGGACTAAAATTGGTTCTAATCCAGGTGACAGGCTACAAGTAGCTAATGTAAATATCAAAGATAATGGAAAAGTTGTGCAACATTTGTACGGAAATGGTAGCAACACAGGTTACATTTTAATGGGTTTTGATGGAAAAGAGACGAGCTTTGCTAACCAAAAGCCAAGTAATATGCAAATAAAATCGATTACTGGTAGTGGATTAGATACCCCCG
Tuber magnatum	16S	Mitochondria	27.197	-	GGGGGCAGCAGTGCAGCAGCTTCTGCCTCAAGCCACAGTTTCGGCGAGCTAATCTCAGCGAACACGATGGTCATCGGTCTATGAAACAGCGAGTGCGGAGCGTATGTCAAACCGTGGATTTGTATCTCGCTGTATCGAGACAACAAATATATTCCCTACGGTGGCTCCACTACATAGGATTTTTGCACGGGATTAGAAACCCCCGTA
Tuber magnatum	16S	Mitochondria	19.9242	-	GGGGGCAGCAGTGCAGCAGCTTCTGCCTCAAGCCACAGTTTCGGCGAGCTAATCTCAGCGAACACGATGGTCATCGGTCTATGAAACAGCGAGTGCGGAGCGTATGTCAAACCGTGGATTTGTATCTCGCTGTATCGAGACAACAAATATATTCCCTACGGTGGCTCCACTACATAGGATTTTTGCACGGGATTAGATACCCTAGT
Tuber magnatum	16S	Mitochondria	4.92424	-	GGTGGCAGCAGTGCAGCAGCTTCTGCCTCAAGCCACAGTTTCGGCGAGCTAATCTCAGCGAACACGATGGTCATCGGTCTATGAAACAGCGAGTGCGGAGCGTATGTCAAACCGTGGATTTGTATCTCGCTGTATCGAGACAACAAATATATTCCCTACGGTGGCTCCACTACATAGGATTTTTGCACGGGATTAGAAACCCCCGTA
Tuber magnatum	16S	Mitochondria	3.33333	-	GGTGGCAGCAGTGCAGCAGCTTCTGCCTCAAGCCACAGTTTCGGCGAGCTAATCTCAGCGAACACGATGGTCATCGGTCTATGAAACAGCGAGTGCGGAGCGTATGTCAAACCGTGGATTTGTATCTCGCTGTATCGAGACAACAAATATATTCCCTACGGTGGCTCCACTACATAGGATTTTTGCACGGGATTAGATACCCTAGT
Tuber magnatum	16S	Mitochondria	-	14.9968	GGGGGCAGCAGTGCAGCAGCTTCTGCCTCAAGCCACAGTTTCGGCGAGCTAATCTCAGCGAACACGATGGTCATCGGTCTATGAAACAGCGAGTGCGGAGCGTATGTCAAACCGTGGATTTGTATCTCGCTGTATCGAGACAACAAATATATTCCCTACGGTGGCTCCACTACATAGGATTTTTGCACGGGATTAGATACCCCCGTA
Tuber magnatum	16S	Mitochondria	-	7.33886	GGGGGCAGCAGTGCAGCAGCTTCTGCCTCAAGCCACAGTTTCGGCGAGCTAATCTCAGCGAACACGATGGTCATCGGTCTATGAAACAGCGAGTGCGGAGCGTATGTCAAACCGTGGATTTGTATCTCGCTGTATCGAGACAACAAATATATTCCCTACGGTGGCTCCACTACATAGGATTTTTGCACGGGATTAGAAACCCCAGTA
Tuber magnatum	16S	Mitochondria	-	6.95597	GGGGGCAGCAGTGCAGCAGCTTCTGCCTCAAGCCACAGTTTCGGCGAGCTAATCTCAGCGAACACGATGGTCATCGGTCTATGAAACAGCGAGTGCGGAGCGTATGTCAAACCGTGGATTTGTATCTCGCTGTATCGAGACAACAAATATATTCCCTACGGTGGCTCCACTACATAGGATTTTTGCACGGGATTAGAAACCCTTGT
Tuber magnatum	16S	Mitochondria	-	2.99936	GGGGGCAGCAGTGCAGCAGCTTCTGCCTCAAGCCACAGTTTCGGCGAGCTAATCTCAGCGAACACGATGGTCATCGGTCTATGAAACAGCGAGTGCGGAGCGTATGTCAAACCGTGGATTTGTATCTCGCTGTATCGAGACAACAAATATATTCCCTACGGTGGCTCCACTACATAGGATTTTTGCACGGGATTAGATACCCTAGTA
Tuber magnatum	16S	Mitochondria	-	2.29738	GGTCGCAGCAGTGCAGCAGCTTCTGCCTCAAGCCACAGTTTCGGCGAGCTAATCTCAGCGAACACGATGGTCATCGGTCTATGAAACAGCGAGTGCGGAGCGTATGTCAAACCGTGGATTTGTATCTCGCTGTATCGAGACAACAAATATATTCCCTACGGTGGCTCCACTACATAGGATTTTTGCACGGGATTAGATACCCCCGTA
Tuber magnatum	16S	Mitochondria	-	1.14869	AAGAACGCAGCGAAACGCGATATTTCTTGTGAATTGCAGAAGTGAATCATCAGTTTTTGAACGCACATTGCACTTTGGGGTATCCCCCAAAGTATACTTGTTTGAGCGTTGTTTCTCTCTTGGAATTGCTTTGCTCTTCTAAAATTTCGAATCAAATTCGTTTGAAAAACAACACTATTCAACCTCAGATCAGGTAGGGATACCCGCTGAACTTAAGCATATCAATAAGC
Tuber magnatum	16S	Nostocaceae	5.37879	-	GGACGCAGCAGTGCAGCAGCTTCTGCCTCAAGCCACAGTTTCGGCGAGCTAATCTCAGCGAACACGATGGTCATCGGTCTATGAAACAGCGAGTGCGGAGCGTATGTCAAACCGTGGATTTGTATCTCGCTGTATCGAGACAACAAATATATTCCCTACGGTGGCTCCACTACATAGGATTTTTGCACGGGATTAGAAACCCCCGTA
Tuber magnatum	16S	Nostocaceae	-	3.9566	CGGGACGCAGCAGTGCAGCAGCTTCTGCCTCAAGCCACAGTTTCGGCGAGCTAATCTCAGCGAACACGATGGTCATCGGTCTATGAAACAGCGAGTGCGGAGCGTATGTCAAACCGTGGATTTGTATCTCGCTGTATCGAGACAACAAATATATTCCCTACGGTGGCTCCACTACATAGGATTTTTGCACGGGATTAGATACCCCCGTA
Tuber magnatum	16S	Nostocaceae	-	3.63752	CGGGACGCACCAGTGCAGCAGCTTCTGCCTCAAGCCACAGTTTCGGCGAGCTAATCTCAGCGAACACGATGGTCATCGGTCTATGAAACAGCGAGTGCGGAGCGTATGTCAAACCGTGGATTTGTATCTCGCTGTATCGAGACAACAAATATATTCCCTACGGTGGCTCCACTACATAGGATTTTTGCACGGGATTAGATACCCCCGTA
Tuber magnatum	16S	Nostocaceae	-	3.12699	GGTCGCACCAGTGCAGCAGCTTCTGCCTCAAGCCACAGTTTCGGCGAGCTAATCTCAGCGAACACGATGGTCATCGGTCTATGAAACAGCGAGTGCGGAGCGTATGTCAAACCGTGGATTTGTATCTCGCTGTATCGAGACAACAAATATATTCCCTACGGTGGCTCCACTACATAGGATTTTTGCACGGGATTAGATACCCCCGTA
Tuber magnatum	16S	Nostocaceae	-	2.23357	GGTCGCAGCAGTGCAGCAGCTTCTGCCTCAAGCCACAGTTTCGGCGAGCTAATCTCAGCGAACACGATGGTCATCGGTCTATGAAACAGCGAGTGCGGAGCGTATGTCAAACCGTGGATTTGTATCTCGCTGTATCGAGACAACAAATATATTCCCTACGGTGGCTCCACTACATAGGATTTTTGCACGGGATTAGAAACCCTTGT
Tuber magnatum	16S	Nostocaceae	-	1.9783	AAGAACGCAGCGAAATGCGATACGTAATATGAATTGCAGATTTTGTGAATCATCGAATCTTTGAACGCACATTGCGCCCGTGGGTATTCCCGCGGGCATGCGTGTGTGAGCGGTTATCTCCCTCGCAGGTAATGGACATACGGCGTCAGCTGTTCCTCCAAAAAGTGATTGGTGTAGTATTACAGTTTACTCACAACCATACTTTTTCCCTCACACACGTAAGACTACCCGCTGAACTTAAGCATATCAATAAGC
Tuber magnatum	16S	Nostocaceae	-	1.72304	GGGGGCAGCAGTGCAGCAGCTTCTGCCTCAAGCCACAGTTTCGGCGAGCTAATCTCAGCGAACACGATGGTCATCGGTCTATGAAACAGCGAGTGCGGAGCGTATGTCAAACCGTGGATTTGTATCTCGCTGTATCGAGACAACAAATATATTCCCTACGGTGGCTCCACTACATAGGATTTTTGCACGGGATTAGATACCCGTGT
Tuber magnatum	16S	Nostocaceae	-	1.08488	GGCTGCAGCAGTGCAGCAGCTTCTGCCTCAAGCCACAGTTTCGGCGAGCTAATCTCAGCGAACACGATGGTCATCGGTCTATGAAACAGCGAGTGCGGAGCGTATGTCAAACCGTGGATTTGTATCTCGCTGTATCGAGACAACAAATATATTCCCTACGGTGGCTCCACTACATAGGATTTTTGCACGGGATTAGATACCCCCGTA
Tuber magnatum	16S	Nostocaceae	-	0.701978	GGAGGCACCAGTGCAGCAGCTTCTGCCTCAAGCCACAGTTTCGGCGAGCTAATCTCAGCGAACACGATGGTCATCGGTCTATGAAACAGCGAGTGCGGAGCGTATGTCAAACCGTGGATTTGTATCTCGCTGTATCGAGACAACAAATATATTCCCTACGGTGGCTCCACTACATAGGATTTTTGCACGGGATTAGAAACCCTTGT
Tuber magnatum	16S	Pectobacteriaceae	-	1.78685	GGTGGCAGCAGCCGCGGTAATACGGAGGGTGCAAGCGTTAATCGGAATTACTGGGCGTAAAGCGCACGCAGGCGGTTTGTTAAGTCAGATGTGAAATCCCCGAGCTTAACTTGGGAACTGCATTTGAAACTGGCAAGCTAGAGTCTTGTAGAGGGGGGTAGAATTCCAGGTGTAGCGGTGAAATGCGTAGAGATCTGGAGGAATACCGGTGGCGAAGGCGGCCCCCTGGACAAAGACTGACGCTCAGGTGCGAAAGCGTGGGGAGCAAACAGGATTAGAAACCCTCG
Tuber magnatum	16S	Pectobacteriaceae	-	1.72304	GGTGGCAGCAGCCGCGGTAATACGGAGGGTGCAAGCGTTAATCGGAATTACTGGGCGTAAAGCGCACGCAGGCGGTTTGTTAAGTCAGATGTGAAATCCCCGAGCTTAACTTGGGAACTGCATTTGAAACTGGCAAGCTAGAGTCTTGTAGAGGGGGGTAGAATTCCAGGTGTAGCGGTGAAATGCGTAGAGATCTGGAGGAATACCGGTGGCGAAGGCGGCCCCCTGGACAAAGACTGACGCTCAGGTGCGAAAGCGTGGGGAGCAAACAGGATTAGATACCCTCGT
Tuber magnatum	16S	Pectobacteriaceae	-	1.59541	GGTGGCAGCAGCCGCGGTAATACGGAGGGTGCAAGCGTTAATCGGAATTACTGGGCGTAAAGCGCACGCAGGCGGTTTGTTAAGTCAGATGTGAAATCCCCGAGCTTAACTTGGGAACTGCATTTGAAACTGGCAAGCTAGAGTCTTGTAGAGGGGGGTAGAATTCCAGGTGTAGCGGTGAAATGCGTAGAGATCTGGAGGAATACCGGTGGCGAAGGCGGCCCCCTGGACAAAGACTGACGCTCAGGTGCGAAAGCGTGGGGAGCAAACAGGATTAGAAACCCGCG
Tuber magnatum	16S	Pectobacteriaceae	-	1.59541	GGTGGCAGCAGCCGCGGTAATACGGAGGGTGCAAGCGTTAATCGGAATTACTGGGCGTAAAGCGCACGCAGGCGGTTTGTTAAGTCAGATGTGAAATCCCCGAGCTTAACTTGGGAACTGCATTTGAAACTGGCAAGCTAGAGTCTTGTAGAGGGGGGTAGAATTCCAGGTGTAGCGGTGAAATGCGTAGAGATCTGGAGGAATACCGGTGGCGAAGGCGGCCCCCTGGACAAAGACTGACGCTCAGGTGCGAAAGCGTGGGGAGCAAACAGGATTAGATACCCCCGT
Tuber magnatum	16S	Pectobacteriaceae	-	1.27632	GGTGGCAGCAGCCGCGGTAATACGGAGGGTGCAAGCGTTAATCGGAATTACTGGGCGTAAAGCGCACGCAGGCGGTTTGTTAAGTCAGATGTGAAATCCCCGAGCTTAACTTGGGAACTGCATTTGAAACTGGCAAGCTAGAGTCTTGTAGAGGGGGGTAGAATTCCAGGTGTAGCGGTGAAATGCGTAGAGATCTGGAGGAATACCGGTGGCGAAGGCGGCCCCCTGGACAAAGACTGACGCTCAGGTGCGAAAGCGTGGGGAGCAAACAGGATTAGAAACCCCCG
Tuber magnatum	16S	Pectobacteriaceae	-	0.957243	GGTGGCAGCAGCCGCGGTAATACGGAGGGTGCAAGCGTTAATCGGAATTACTGGGCGTAAAGCGCACGCAGGCGGTTTGTTAAGTCAGATGTGAAATCCCCGAGCTTAACTTGGGAACTGCATTTGAAACTGGCAAGCTAGAGTCTTGTAGAGGGGGGTAGAATTCCAGGTGTAGCGGTGAAATGCGTAGAGATCTGGAGGAATACCGGTGGCGAAGGCGGCTCACTGGTCCATTACTGACGCTGAGGTGCGAAAGCGTGGGGAGCAAACAGGATTAGAAACCCCCGTA
Tuber magnatum	16S	Rhizobiaceae	2.95455	-	GGTGGCAGCAGCCGCGGTAATACGAAGGGGGCTAGCGTTGTTCGGAATTACTGGGCGTAAAGCGCACGTAGGCGGATCGATCAGTCAGGGGTGAAATCCCGCAGCTCAACTGCGGAACTGCCTTTGATACTGTCGATCTAGAGTATGGAAGAGGTGAGTGGAATTCCGAGTGTAGAGGTGAAATTCGTAGATATTCGGAGGAACACCAGTGGCGAAGGCGGCTCACTGGTCCATTACTGACGCTGAGGTGCGAAAGCGTGGGGAGCAAACAGGATTAGATACCCCCGTA
Tuber magnatum	16S	Rhizobiaceae	2.95455	-	GGTGGCAGCAGCCGCGGTAATACGAAGGGGGCTAGCGTTGTTCGGAATTACTGGGCGTAAAGCGCACGTAGGCGGATCGATCAGTCAGGGGTGAAATCCCGCAGCTCAACTGCGGAACTGCCTTTGATACTGTCGATCTAGAGTATGGAAGAGGTGAGTGGAATTCCGAGTGTAGAGGTGAAATTCGTAGATATTCGGAGGAACACCAGTGGCGAAGGCGGCTCACTGGTCCATTACTGACGCTGAGGTGCGAAAGCGTGGGGAGCAAACAGGATTAGAAACCCTCGT
Tuber magnatum	16S	Rhizobiaceae	2.5	-	GGTGGCAGCAGCCGCGGTAATACGAAGGGGGCTAGCGTTGTTCGGAATTACTGGGCGTAAAGCGCACGTAGGCGGATCGATCAGTCAGGGGTGAAATCCCGCAGCTCAACTGCGGAACTGCCTTTGATACTGTCGATCTAGAGTATGGAAGAGGTGAGTGGAATTCCGAGTGTAGAGGTGAAATTCGTAGATATTCGGAGGAACACCAGTGGCGAAGGCGGCTCACTGGTCCATTACTGACGCTGAGGTGCGAAAGCGTGGGGAGCAAACAGGATTAGAAACCCCCG
Tuber magnatum	16S	Rhizobiaceae	2.04545	-	GGTGGCAGCAGCCGCGGTAATACGAAGGGGGCTAGCGTTGTTCGGAATTACTGGGCGTAAAGCGCACGTAGGCGGATCGATCAGTCAGGGGTGAAATCCCGCAGCTCAACTGCGGAACTGCCTTTGATACTGTCGATCTAGAGTATGGAAGAGGTGAGTGGAATTCCGAGTGTAGAGGTGAAATTCGTAGATATTCGGAGGAACACCAGTGGCGAAGGCGGCTCACTGGTCCATTACTGACGCTGAGGTGCGAAAGCGTGGGGAGCAAACAGGATTAGATACCCGCGT
Tuber magnatum	16S	Rhizobiaceae	1.59091	-	GGTGGCAGCAGCCGCGGTAATACGAAGGGGGCTAGCGTTGTTCGGAATTACTGGGCGTAAAGCGCACGTAGGCGGATCGATCAGTCAGGGGTGAAATCCCGCAGCTCAACTGCGGAACTGCCTTTGATACTGTCGATCTAGAGTATGGAAGAGGTGAGTGGAATTCCGAGTGTAGAGGTGAAATTCGTAGATATTCGGAGGAACACCAGTGGCGAAGGCGGCTCACTGGTCCATTACTGACGCTGAGGTGCGAAAGCGTGGGGAGCAAACAGGATTAGATACCCGTGT
Tuber magnatum	16S	Rhizobiaceae	1.06061	-	GGTGGCAGCAGCCGCGGTAATACGAAGGGGGCTAGCGTTGTTCGGAATTACTGGGCGTAAAGCGCACGTAGGCGGATCGATCAGTCAGGGGTGAAATCCCGCAGCTCAACTGCGGAACTGCCTTTGATACTGTCGATCTAGAGTATGGAAGAGGTGAGTGGAATTCCGAGTGTAGAGGTGAAATTCGTAGATATTCGGAGGAACACCAGTGGCGAAGGCGGCTCACTGGTCCATTACTGACGCTGAGGTGCGAAAGCGTGGGGAGCAAACAGGATTAGAAACCCGAGT
Tuber magnatum	16S	Rhizobiaceae	-	1.46777	GGTGGCAGCAGCCGCGGTAATACGAAGGGGGCTAGCGTTGTTCGGAATTACTGGGCGTAAAGCGCACGTAGGCGGATCGATCAGTCAGGGGTGAAATCCCAGGGCTCAACCCTGGAACTGCCTTTGATACTGTCGATCTGGAGTATGGAAGAGGTGAGTGGAATTCCGAGTGTAGAGGTGAAATTCGTAGATATTCGGAGGAACACCAGTGGCGAAGGCGGCTCACTGGTCCATTACTGACGCTGAGGTGCGAAAGCGTGGGGAGCAAACAGGATTAGATACCCTCGT
Tuber magnatum	16S	Rhizobiaceae	-	1.34014	GGTGGCAGCAGCCGCGGTAATACGAAGGGGGCTAGCGTTGTTCGGAATTACTGGGCGTAAAGCGCACGTAGGCGGATCGATCAGTCAGGGGTGAAATCCCAGGGCTCAACCCTGGAACTGCCTTTGATACTGTCGATCTGGAGTATGGAAGAGGTGAGTGGAATTCCGAGTGTAGAGGTGAAATTCGTAGATATTCGGAGGAACACCAGTGGCGAAGGCGGCTCACTGGCCCGATACTGACGCTGAGGCACGAAAGCGTGGGGAGCAAACAGGATTAGAAACCCCCG
Tuber magnatum	16S	Rhizobiaceae	-	1.21251	GGTGGCAGCAGCCGCGGTAATACGAAGGGGGCTAGCGTTGTTCGGAATTACTGGGCGTAAAGCGCACGTAGGCGGATCGATCAGTCAGGGGTGAAATCCCAGGGCTCAACCCTGGAACTGCCTTTGATACTGTCGATCTGGAGTATGGAAGAGGTGAGTGGAATTCCGAGTGTAGAGGTGAAATTCGTAGATATTCGGAGGAACACCAGTGGCGAAGGCGGCTCACTGGTCCATTACTGACGCTGAGGTGCGAAAGCGTGGGGAGCAAACAGGATTAGAAACCCCTG
Tuber magnatum	16S	Rhizobiaceae	-	1.14869	GGTGGCAGCAGCCGCGGTAATACGAAGGGGGCTAGCGTTGTTCGGAATTACTGGGCGTAAAGCGCACGTAGGCGGATCGATCAGTCAGGGGTGAAATCCCAGGGCTCAACCCTGGAACTGCCTTTGATACTGTCGATCTGGAGTATGGAAGAGGTGAGTGGAATTCCGAGTGTAGAGGTGAAATTCGTAGATATTCGGAGGAACACCAGTGGCGAAGGCGGCTCACTGGTCCATTACTGACGCTGAGGTGCGAAAGCGTGGGGAGCAAACAGGATTAGATACCCCCG
Tuber magnatum	16S	Rhizobiaceae	-	1.14869	GGTGGCAGCAGCCGCGGTAATACGAAGGGGGCTAGCGTTGTTCGGAATTACTGGGCGTAAAGCGCACGTAGGCGGATCGATCAGTCAGGGGTGAAATCCCAGGGCTCAACCCTGGAACTGCCTTTGATACTGTCGATCTGGAGTATGGAAGAGGTGAGTGGAATTCCGAGTGTAGAGGTGAAATTCGTAGATATTCGGAGGAACACCAGTGGCGAAGGCGGCTCACTGGTCCATTACTGACGCTGAGGTGCGAAAGCGTGGGGAGCAAACAGGATTAGAAACCCCCG
Tuber magnatum	16S	Rhizobiaceae	-	0.638162	GGTGGCAGCAGCCGCGGTAATACGAAGGGGGCTAGCGTTGTTCGGAATTACTGGGCGTAAAGCGCACGTAGGCGGATCGATCAGTCAGGGGTGAAATCCCAGGGCTCAACCCTGGAACTGCCTTTGATACTGTCGATCTGGAGTATGGAAGAGGTGAGTGGAATTCCGAGTGTAGAGGTGAAATTCGTAGATATTCGGAGGAACACCAGTGGCGAAGGCGGCCCCCTGGACAAAGACTGACGCTCAGGTGCGAAAGCGTGGGGAGCAAACAGGATTAGAAACCCTTGT
Tuber magnatum	16S	Saccharimonadaceae	-	1.9783	GGCGGCACCAGTGCAGCAGCTTCTGCCTCAAGCCACAGTTTCGGCGAGCTAATCTCAGCGAACACGATGGTCATCGGTCTATGAAACAGCGAGTGCGGAGCGTATGTCAAACCGTGGATTTGTATCTCGCTGTATCGAGACAACAAATATATTCCCTACGGTGGCTCCACTACATAGGATTTTTGCACGGGATTAGATACCCCCGTA
Tuber magnatum	16S	Saccharimonadaceae	1.74242	-	GGGTGCACCAGCCGCGGTCATACGTAGGACCCAAGCGTTATCCGGAGTGACTGGGCGTAAAGAGTTGCGTAGGTGGCTTGTAAAGTGAATAGTGAAACCTGGTGGCTCAACCATACAGACTATTATTCAAACTCACAAGCTCGAGAATGGTAGAGGTAACTGGAATTTCTAGTGTAGGAGTGAAATCCGTAGATATTAGAAGGAACACCAATGGCGTAGGCAGGTTACTGGACCATTTCTGACACTGAGGCACGAAAGCGTGGGGAGCGAACCGGATTAGATACCCTAGT
Tuber magnatum	16S	Beijerinckiaceae	1.65138	-	GGCGGCAGCAGCCGCGGTAATACGAAGGGGGCTAGCGTTGCTCGGAATCACTGGGCGTAAAGGGCGCGTAGGCGGACTTTTAAGTCGGGGGTGAAAGCCCAGGGCTCAACCCTGGAATTGCCTTCGATACTGGGAGTCTTGAGTTCGGAAGAGGTTGGTGGAACTGCGAGTGTAGAGGTGAAATTCGTAGATATTCGCAAGAACACCAGTGGCGAAGGCGGCCAACTGGTCCGAAACTGACGCTGAGGCGCGAAAGCGTGGGGAGCAAACAGGATTAGATACCCCCGTA
Tuber magnatum	16S	Halobacteriaceae	4.77064	-	GGGGCGCAGCAGGAAAGGACGGAACGGGGAGCACCAATCACGGTGCATGTGAATTGGGAGTCTGTCATCGTGCGGACTGCAGGTGCAGGTGCTTACCTCGTGAGACTGCTTCCCAATGTAACTTACCTGGCCCCCACATCCGATAAACGTAACACAGCGAGCACTACCAAGTGGAACAGCAGCGAAACAAATACCATATCTAGTCGGGATTAGAAACCCTTGT
Tuber magnatum	16S	Listeriaceae	-	8.99796	GGTGGCAGCAGCCGCGGTAATACGTAGGTGGCAAGCGTTGTCCGGAATTATTGGGCGTAAAGCGCGCGCAGGCGGTCTCTTAAGTCTGATGTGAAAGCCCCCGGCTCAACCGGGGAGGGTCATTGGAAACTGGGAGACTTGAGGACAGAAGAGGAGAGTGGAATTCCAAGTGTAGCGGTGAAATGCGTAGATATTTGGAGGAACACCAGTGGCGAAGGCGGCTCTCTGGTCTGTTACTGACGCTGAGGCGCGAAAGCGTGGGGAGCAAACAGGATTAGATACCCTCGT
Tuber magnatum	16S	Listeriaceae	-	6.95297	GGTGGCAGCAGCCGCGGTAATACGTAGGTGGCAAGCGTTGTCCGGAATTATTGGGCGTAAAGCGCGCGCAGGCGGTCTCTTAAGTCTGATGTGAAAGCCCCCGGCTCAACCGGGGAGGGTCATTGGAAACTGGGAGACTTGAGGACAGAAGAGGAGAGTGGAATTCCAAGTGTAGCGGTGAAATGCGTAGATATTTGGAGGAACACCAGTGGCGAAGGCGGCTCTCTGGTCTGTTACTGACGCTGAGGCGCGAAAGCGTGGGGAGCAAACAGGATTAGAAACCCCAGT
Tuber magnatum	16S	Mitochondria	44.5872	-	AAGAACGCAGCGAAACGCGATATTTCTTGTGAATTGCAGAAGTGAATCATCAGTTTTTGAACGCACATTGCACTTTGGGGTATCCCCCAAAGTATACTTGTTTGAGCGTTGTTTCTCTCTTGGAATTGCTTTGCTCTTCTAAAATTTCGAATCAAATTCGTTTGAAAAACAACACTATTCAACCTCAGATCAAGTAGGATTACCCGCTGAACTTAAGCATATCAATAAGC
Tuber magnatum	16S	Mitochondria	6.05505	-	AAGAACGCAGCGAAATGCGATAGGTAATGTGAATTGCAGAAGTGAATCATCAGTTTTTGAACGCACATTGCACTTTGGGGTATCCCCCAAAGTATACTTGTTTGAGCGTTGTTTCTCTCTTGGAATTGCTTTGCTCTTCTAAAATTTCGAATCAAATTCGTTTGAAAAACAACACTATTCAACCTCAGATCAAGTAGGATTACCCGCTGAACTTAAGCATATCAATAAGC
Tuber magnatum	16S	Mitochondria	3.11927	-	AAGAACGCAGCGAAACGCGATATTTCTTGTGAATTGCAGAAGTGAATCATCAGTTTTTGAACGCACATTGCACTTTGGGGTATCCCCCAAAGTATACTTGTTTGAGCGTTGTTTCTCTCTTGGAATTGCATTGCTTTTCTAAAATTTCGAATCAAATTCGTTTGAAAAACAACACTATTCAACCTCAGATCAAGTAGGATTACCCGCTGAACTTAAGCATATCAATAAGC
Tuber magnatum	16S	Mitochondria	1.65138	-	AAGAACGCAGCGAAACGCGATATTTCTTGTGAATTGCAGAAGTGAATCATCAGTTTTTGAACGCACATTGCACTTTGGGGTATCCCCCAAAGTATACTTGTTTGAGCGTTGTTTCTCTCTTGGAATTGCTTTGCTCTTCTAAAATTTCGAATCAAATTCGTTTGAAAAACAACACTATTCAACCTCAGATCAGGTAGGGATACCCGCTGAACTTAAGCATATCAATAAGC
Tuber magnatum	16S	Mitochondria	-	23.5174	AAGAACGCAGCGAAACGCGATATTTCTTGTGAATTGCAGAAGTGAATCATCAGTTTTTGAACGCACATTGCACTTTGGGGTATCCCCCAAAGTATACTTGTTTGAGCGTTGTTTCTCTCTTGGAATTGCTTTGCTCTTCTAAAATTTCGAATCAAATTCGTTTGAAAAACAACACTATTCAACCTCAGATCAAGTAGGATTACCCGCTGAACTTAAGCATATCAATAAGC
Tuber magnatum	16S	Mitochondria	-	3.68098	GGTTGCAGCAGTCGCGGTAATACGTGAGAGACTAGCGTTATTCATATTTAATTGGTTTAAAGGGTTACTAGACGGTAATTTTTGCCTTTGAATGGGACAGAGTTACTAGAGTTTTATGTGAAAAGTATATTTAGAACTCATGGTGTAGAACTGATAATTTAAAATACTATGGGGAATGATAAAGGCGAAGGCAAACTTTTATGTAAAAACTGACGTTGAGGAACGAAGGCAAGGACAGTGAATAGGATTAGATACCCCTG
Tuber magnatum	16S	NA	0.733945	-	AAGAACGCAGCGGCAGTGGCCGGGTCCACCCTGTCGAAATTCACTGGGAGGATGACGGACCCCCGGCTGCTGACTTTGTACACACCGCCTTGAAATGCGTGCTAGTTGCCAGCCACGCCTGGTCCTGCCCGATTGCGGATCCCCGTCATGGGATCCACTGTCAAACTGGGTTGACCTCGGATCAGGTAGGGATACCTGCTAAACTTAAGCATATCAATAAGC
Tuber magnatum	16S	NA	-	0.613497	AAGAACGCAGCGAAATGCGATACGTAGTACGAAACGCAAGTCGTGAATCATCGAATCTTTGAACGCACATTGCGCTGTGTGGCATTCCACACAGCATGCCTGTTTGAGCAATATTTCTCTCTCGCAAGGTGTTGGGCACCACGCCGGCAGGCGTCTGCCAGAAACGAAATTGTCTAAAGCAGTTAAGCTTGTTACAGACTCTTGATCTTATTCTCAAATCAGGTAGGACTACCCGCTGAACTTAAGCATATCAATAAGC
Tuber magnatum	16S	Nostocaceae	5.68807	-	GGGGGGCACCAGTGCAGCAGCTTCTGCCTCAAGCCACAGTTTCGGCGAGCTAATCTCAGCGAACACGATGGTCATCGGTCTATGAAACAGCGAGTGCGGAGCGTATGTCAAACCGTGGATTTGTATCTCGCTGTATCGAGACAACAAATATATTCCCTACGGTGGCTCCACTACATAGGATTTTTGCACGGGATTAGAAACCCTGGT
Tuber magnatum	16S	Pectobacteriaceae	11.9266	-	GGTGGCAGCAGCCGCGGTAATACGGAGGGTGCAAGCGTTAATCGGAATTACTGGGCGTAAAGCGCACGCAGGCGGTTTGTTAAGTCAGATGTGAAATCCCCGAGCTTAACTTGGGAACTGCATTTGAAACTGGCAAGCTAGAGTCTTGTAGAGGGGGGTAGAATTCCAGGTGTAGCGGTGAAATGCGTAGAGATCTGGAGGAATACCGGTGGCGAAGGCGGCCCCCTGGACAAAGACTGACGCTCAGGTGCGAAAGCGTGGGGAGCAAACAGGATTAGATACCCTTGT
Tuber magnatum	16S	Pectobacteriaceae	-	4.49898	GGGGGCACCAGCCGCGGTAATACGGAGGGTGCAAGCGTTAATCGGAATTACTGGGCGTAAAGCGCACGCAGGCGGTTTGTTAAGTCAGATGTGAAATCCCCGAGCTTAACTTGGGAACTGCATTTGAAACTGGCAAGCTAGAGTCTTGTAGAGGGGGGTAGAATTCCAGGTGTAGCGGTGAAATGCGTAGAGATCTGGAGGAATACCGGTGGCGAAGGCGGCCCCCTGGACAAAGACTGACGCTCAGGTGCGAAAGCGTGGGGAGCAAACAGGATTAGAAACCCCAGTA
Tuber magnatum	16S	Rhizobiaceae	10.2752	-	GGGGGCACCAGCCGCGGTAATACGAAGGGGGCTAGCGTTGTTCGGAATTACTGGGCGTAAAGCGCACGTAGGCGGATCGATCAGTCAGGGGTGAAATCCCAGGGCTCAACCCTGGAACTGCCTTTGATACTGTCGATCTGGAGTATGGAAGAGGTGAGTGGAATTCCGAGTGTAGAGGTGAAATTCGTAGATATTCGGAGGAACACCAGTGGCGAAGGCGGCTCACTGGTCCATTACTGACGCTGAGGTGCGAAAGCGTGGGGAGCAAACAGGATTAGAAACCCTTGT
Tuber magnatum	16S	Rhizobiaceae	3.48624	-	GGTGGCAGCAGCCGCGGTAATACGAAGGGGGCTAGCGTTGTTCGGAATTACTGGGCGTAAAGCGCACGTAGGCGGACATTTAAGTCAGGGGTGAAATCCCAGAGCTCAACTCTGGAACTGCCTTTGATACTGGGTGTCTAGAGTATGGAAGAGGTGAGTGGAATTCCGAGTGTAGAGGTGAAATTCGTAGATATTCGGAGGAACACCAGTGGCGAAGGCGGCTCACTGGTCCATTACTGACGCTGAGGTGCGAAAGCGTGGGGAGCAAACAGGATTAGAAACCCTCG
Tuber magnatum	16S	Rhizobiaceae	-	8.79346	CGGGAGGCAGCAGCCGCGGTAATACGAAGGGGGCTAGCGTTGTTCGGATTTACTGGGCGTAAAGCGCACGTAGGCGGACTATTAAGTCAGGGGTGAAATCCCGGGGCTCAACCCCGGAACTGCCTTTGATACTGGTAGTCTTGAGTTCGAGAGAGGTGAGTGGAATTCCGAGTGTAGAGGTGAAATTCGTAGATATTCGGAGGAACACCAGTGGCGAAGGCGGCTCACTGGCTCGATACTGACGCTGAGGTGCGAAAGCGTGGGGAGCAAACAGGATTAGAAACCCCCG
Tuber magnatum	16S	Rhizobiaceae	-	6.54397	GGTGGCAGCAGCCGCGGTAATACGAAGGGGGCTAGCGTTGTTCGGAATTACTGGGCGTAAAGCGCACGTAGGCGGACATTTAAGTCAGGGGTGAAATCCCAGAGCTCAACTCTGGAACTGCCTTTGATACTGGGTGTCTAGAGTATGGAAGAGGTGAGTGGAATTCCGAGTGTAGAGGTGAAATTCGTAGATATTCGGAGGAACACCAGTGGCGAAGGCGGCTCACTGGTCCATTACTGACGCTGAGGTGCGAAAGCGTGGGGAGCAAACAGGATTAGAAACCCCCG
Tuber magnatum	16S	Rhizobiaceae	-	6.33947	CGGGAGGCAGCAGCCGCGGTAATACGAAGGGGGCTAGCGTTGTTCGGATTTACTGGGCGTAAAGCGCACGTAGGCGGACTATTAAGTCAGGGGTGAAATCCCGGGGCTCAACCCCGGAACTGCCTTTGATACTGGTAGTCTTGAGTTCGAGAGAGGTGAGTGGAATTCCGAGTGTAGAGGTGAAATTCGTAGATATTCGGAGGAACACCAGTGGCGAAGGCGGCTCACTGGCTCGATACTGACGCTGAGGTGCGAAAGCGTGGGGAGCAAACAGGATTAGATACCCTTGT
Tuber magnatum	16S	Rhizobiaceae	-	4.49898	GGTGGCAGCAGCCGCGGTAATACGAAGGGGGCTAGCGTTGTTCGGAATTACTGGGCGTAAAGCGCACGTAGGCGGACATTTAAGTCAGGGGTGAAATCCCAGAGCTCAACTCTGGAACTGCCTTTGATACTGGGTGTCTAGAGTATGGAAGAGGTGAGTGGAATTCCGAGTGTAGAGGTGAAATTCGTAGATATTCGGAGGAACACCAGTGGCGAAGGCGGCTCACTGGTCCATTACTGACGCTGAGGTGCGAAAGCGTGGGGAGCAAACAGGATTAGAAACCCCAG
Tuber magnatum	16S	Rhizobiaceae	-	4.49898	GGTGGCAGCAGCCGCGGTAATACGAAGGGGGCTAGCGTTGTTCGGAATTACTGGGCGTAAAGCGCACGTAGGCGGACATTTAAGTCAGGGGTGAAATCCCAGAGCTCAACTCTGGAACTGCCTTTGATACTGGGTGTCTAGAGTATGGAAGAGGTGAGTGGAATTCCGAGTGTAGAGGTGAAATTCGTAGATATTCGGAGGAACACCAGTGGCGAAGGCGGCTCACTGGTCCATTACTGACGCTGAGGTGCGAAAGCGTGGGGAGCAAACAGGATTAGATACCCTCGT
Tuber magnatum	16S	Rhizobiaceae	-	4.08998	GGTGGCAGCAGCCGCGGTAATACGAAGGGGGCTAGCGTTGTTCGGAATTACTGGGCGTAAAGCGCACGTAGGCGGACATTTAAGTCAGGGGTGAAATCCCAGAGCTCAACTCTGGAACTGCCTTTGATACTGGGTGTCTAGAGTATGGAAGAGGTGAGTGGAATTCCGAGTGTAGAGGTGAAATTCGTAGATATTCGGAGGAACACCAGTGGCGAAGGCGACTCTCTGGTCTGTAACTGACGCTGAGGCTCGAAAGCGTGGGGAGCAAACAGGATTAGAAACCCTCGT
Tuber magnatum	16S	Rhizobiaceae	-	3.06748	GGTGGCAGCAGCCGCGGTAATACGAAGGGGGCTAGCGTTGTTCGGAATTACTGGGCGTAAAGCGCACGTAGGCGGACATTTAAGTCAGGGGTGAAATCCCAGAGCTCAACTCTGGAACTGCCTTTGATACTGGGTGTCTAGAGTATGGAAGAGGTGAGTGGAATTCCGAGTGTAGAGGTGAAATTCGTAGATATTCGCAAGAACACCAGTGGCGAAGGCGGCTCACTGGCCCGATACTGACGCTGAGGCACGAAAGCGTGGGGAGCAAACAGGATTAGAAACCCCAG
Tuber magnatum	16S	Saccharimonadaceae	4.22018	-	AAGAACGCAGCGAAATGCGATACGTAATATGAATTGCAGATTTTGTGAATCATCGAATCTTTGAACGCACATTGCGCCCGTGGGTATTCCCGCGGGCATGCGTGTGTGAGCGGTTATCTCCCTCGCAGGTAATGGACATACGGCGTCAGCTGTTCCTCCAAAAAGTGATTGGTGTAGTATTACAGTTTACTCACAACCATACTTTTTCCCTCACACACGTAAGACTACCCGCTGAACTTAAGCATATCAATAAGC
Tuber magnatum	16S	Saccharimonadaceae	1.83486	-	AAGAACGCAGCGAAATGCGATAGGTAATGTGAATTGCAGAACTCAGTGAATCATCGAATCTTTGAACGCACATTGCGCCCGTGGGTATTCCCGCGGGCATGCGTGTGTGAGCGGTTATCTCCCTCGCAGGTAATGGACATACGGCGTCAGCTGTTCCTCCAAAAAGTGATTGGTGTAGTATTACAGTTTACTCACAACCATACTTTTTCCCTCACACACGTAAGACTACCCGCTGAACTTAAGCATATCAATAAGC
Tuber magnatum	16S	Saccharimonadaceae	-	7.15746	AAGAACGCAGCGAAATGCGATACGTAATATGAATTGCAGATTTTGTGAATCATCGAATCTTTGAACGCACATTGCGCCCGTGGGTATTCCCGCGGGCATGCGTGTGTGAGCGGTTATCTCCCTCGCAGGTAATGGACATACGGCGTCAGCTGTTCCTCCAAAAAGTGATTGGTGTAGTATTACAGTTTACTCACAACCATACTTTTTCCCTCACACACGTAAGACTACCCGCTGAACTTAAGCATATCAATAAGC
Tuber magnatum	16S	Yersiniaceae	-	6.74847	GGGGGCACCAGCCGCGGTAATACGGAGGGTGCAAGCGTTAATCGGAATTACTGGGCGTAAAGCGCACGCAGGCGGTTTGTTAAGTCAGATGTGAAATCCCCGAGCTTAACTTGGGAACTGCATTTGAAACTGGCAAGCTAGAGTCTTGTAGAGGGGGGTAGAATTCCAGGTGTAGCGGTGAAATGCGTAGAGATCTGGAGGAATACCGGTGGCGAAGGCGGCCCCCTGGACAAAGACTGACGCTCAGGTGCGAAAGCGTGGGGAGCAAACAGGATTAGATACCCTCGT

## Sheet: 18S
Host	Profile		seq	hits	Sequences	Superkingdom	Clade	Kingdom	Subkingdom	Phylum	clade	subphylum	clade	clade	Class	Subclass	Order	Family	Genus	Species
Tuber macrosporum	18S	Gleba	AAATGCGATAAGTAATGTGAATTGCAGAATTCAGTGAATCATCGAATCTTTGAACGCACATTGCGCCCCCTGGTATTCCGGGGGGCATGCCTGTTCGAGCGTCATTTCACCACTCAAGCCTCGCTTGGTATTGGGCGACGCGGTCCGCCGCGCGCCTCAAATCGACCGGCTGGGTCTTCTGTCCCCTCAGCGTTGTGGAAACTATTCGCTAAAGGGTGCCACGGGAGGCCACGCCGAAAAACAAACCCATTTCTAAGGTTGACCTCGGATCAGGTAGGGATACCCGCTGAACTTAAGC	11	cellular organisms	Eukaryota	Opisthokonta	Fungi	Dikarya	Ascomycota	saccharomyceta	Pezizomycotina	leotiomyceta	dothideomyceta	Dothideomycetes	Dothideomycetidae	Cladosporiales	Cladosporiaceae	Cladosporium	Cladosporium marinisedimentum
Tuber macrosporum	18S	Gleba	AAATGCGATACGTAATATGAATTGCAGATATTCGTGAATCATCGAATCTTTGAACGCACATTGCGCCCTCTGGTATTCCGGAGGGCATGCCTGTTTGAGCGTCGTTTCTCCCTCAAACCGCTGGGTTTGGTGTTGAGCAATACGACTTGGGTTTGCTTGAAAGACGGTAGTGGTAAGGCGGGATCGCTTTGACAATGGCTTAGGTCTAACCAAAAACATTGCTTGCGGCGGTAACGTCCACCACGTATATCTTCAAACTTTGACCTCAAATCAGGTAGGACTACCCGCTGAACTTAAGC	40	cellular organisms	Eukaryota	Opisthokonta	Fungi	Dikarya	Ascomycota	saccharomyceta	Saccharomycotina			Saccharomycetes		Saccharomycetales	Debaryomycetaceae	Candida	Candida albicans
Tuber macrosporum	18S	Gleba	AAACGCGATATTTCTTGTGAATTGCAGAAGTGAATCATCAGTTTTTGAACGCACATTGCACTTTGGGGTATCCCCCAAAGTATACTTGTTTGAGCGTTGTTTCTCTCTTGGAATTGCTTTGCTCTTCTAAAATTTCGAATCAAATTCGTTTGAAAAACAACACTATTCAACCTCAGATCAAGTAGGATTACCCGCTGAACTTAAGC	690	cellular organisms	Eukaryota	Opisthokonta	Fungi	Dikarya	Ascomycota	saccharomyceta	Saccharomycotina			Saccharomycetes		Saccharomycetales	Dipodascaceae	Geotrichum	Geotrichum candidum
Tuber macrosporum	18S	Gleba	AACCGCGATATTTTTTGTGACTTGCAGATGTGAATCATCAATCTTTGAACGCACATTGCGCGGTATGGCATTCCGTACCGCACGGATGGAGGAGCGTGTTCCCTCTGGGATCGCATTGCTTTCTTGAAATGGATTTTTTAAACTCTCAATTATTACGTCATTTCACCTCCTTCATCCGAGATTACCCGCTGAACTTAAGC	48	cellular organisms	Eukaryota	Opisthokonta	Fungi	Dikarya	Ascomycota	saccharomyceta	Saccharomycotina			Saccharomycetes		Saccharomycetales	Dipodascaceae	Yarrowia	Yarrowia lipolytica
Tuber macrosporum	18S	Gleba	AAACGCGATATTTCTTGTGAATTGCAGAAGTGAATCATCAGTTTTTGAACGCACATTGCACTTTGGGGTATCCCCCAAAGTATACTTGTTTGAGCGTTGTTTCTCTCTTGGAATTGCTTTGCTCTTCTAAAATTTCGAATCAAATTCGTTTGAAAAACAACACTATTCAACCTCAGATCAGGTAGGGATACCCGCTGAACTTAAGC	24	cellular organisms	Eukaryota	Opisthokonta	Fungi	Dikarya	Ascomycota	saccharomyceta	Saccharomycotina			Saccharomycetes		Saccharomycetales	Dipodascaceae	Geotrichum	Geotrichum candidum
Tuber macrosporum	18S	Gleba	AAATGCGATAAGTAATGTGAATTGCAGAATTCAGTGAATCATCGAATCTTTGAACGCACCTTGCGCCCCTTGGCATTCCGAGGGGCACGCCTGTTTGAGTGTCGTGAACTCCTCCACCCTCCACCTTTTTCGGAAGGCGTTGGGCTGGGATTTGGGAGCTTGCGGGTCCCTGGCCGATCCGCTCTCCTTGAATACATTAGCGAAGCCCTTGCGGCCTTGGTGTGATAGTCATCTACGCCTCGGTTTAGCGAACATACGGGAATCGCTTCCAACCGTCTCGCAAGAGACAATCACTTCAAACTTGACCTCAAATCAGGCGGGACTACCCGCTGAACTTAAGC	97	cellular organisms	Eukaryota	Opisthokonta	Fungi	Dikarya	Basidiomycota		Agaricomycotina			Agaricomycetes		Russulales	Peniophoraceae	Peniophora	Peniophora lycii
Tuber macrosporum	18S	Gleba	AAACGCGATATGTAATGTGAATTGCAGAATTCAGTGAATCATCGAATCTTTGAACGCACATGGCGCCTTCCAGTATCCTGGGAGGCATGCCTGTCCGAGCGTCGTTTCAACCCTCGAGCCCCTGTGGCCCGGCGTTGGGGATCTGCCACGGCAGGCCCCTAAAACCAGTGGCGGACCCGAAGGCCCTCTCCTTTGCGCAGTAGCATCGGCCTCGCATTGGGATCCCTCGGCGTCCTGCCTCTAAACCCCCCACAAGTCCGCTCCGGCGGCACCAAGGTTGACCTCGGATCAGGTAGGAATACCCGCTGAACTTAAGC	287	cellular organisms	Eukaryota	Opisthokonta	Fungi	Dikarya	Ascomycota	saccharomyceta	Pezizomycotina	leotiomyceta		Sordariomycetes		Glomerellales	Plectosphaerellaceae	Plectosphaerella	Plectosphaerella sp.
Tuber macrosporum	18S	Gleba	AAATGCGATAAGTAATGTGAATTGCAGAATTCAGTGAATCATCGAATCTTTGAACGCACCTTGCGCTCCTTGGTATTCCGAGGAGCATGCCTGTTTGAGTGTCATGGAATTCTCAACTTATAAATCCTTGTGATCTATAAGCTTGGACTTGGAGGCTTGCTGGCCCTTGCGGTCGGCTCCTCTTGAATGCATTAGCTCGATTCCGTACGGATCGGCTCTCAGTGTGATAATTGTCTACGCTGTGACCGTGAAGTGTTTTGGCGAGCTTCTAACCGTCCATTAGGACAACTTTTTAACATCTGACCTCAAATCAGGTAGGACTACCCGCTGAACTTAAGC	15	cellular organisms	Eukaryota	Opisthokonta	Fungi	Dikarya	Basidiomycota		Agaricomycotina			Agaricomycetes		Polyporales	Polyporaceae	Trametes	Trametes versicolor
Tuber macrosporum	18S	Gleba	AAATGCGATACGTAATATGAATTGCAGATTTTGTGAATCATCGAATCTTTGAACGCACATTGCGCCCGTGGGTATTCCCGCGGGCATGCGTGTGTGAGCGGTTATCTCCCTCGCAGGTAATGGACATACGGCGTCAGCTGTTCCTCCAAAAAGTGATTGGTGTAGTATTACAGTTTACTCACAACCATACTTTTTCCCTCACACACGTAAGACTACCCGCTGAACTTAAGC	55	cellular organisms	Eukaryota	Opisthokonta	Fungi	Dikarya	Ascomycota	saccharomyceta	Saccharomycotina			Saccharomycetes		Saccharomycetales	Saccharomycetales incertae sedis	Diutina	Diutina catenulata
Tuber macrosporum	18S	Gleba	AAATGCGATAAGTAATGTGAATTGCAGAATTCAGTGAATCATCGAATCTTTGAACGCACATTGCGCCCTCTGGCATTCCTCAGGGCATGCCTGTTCGAGCGTCAATACAAACCCCCCTCACCCTCCTGGTGGTACTGGCGGAGGTGGGTCGCCCTCCCGGCGACAGGCCCACCCCGTCGAAACTCATGGGCCCGAGAGCCGACAGCTGCGACTGACATTCCAAGCGCTTTGAAAGCCAGAACCAGTCCGCGCCGATGTCTCGCGGTGCCCCGCTGGACCTCCCGTCCAGCGCAACACTCTGGGTTGACCTCGGATCAGGTAGGGATACCCGCTGAACTTAAGC	9209	cellular organisms	Eukaryota	Opisthokonta	Fungi	Dikarya	Ascomycota	saccharomyceta	Pezizomycotina			Pezizomycetes		Pezizales	Tuberaceae	Tuber	Tuber macrosporum
Tuber macrosporum	18S	Gleba	AAATGCGATAAGTAATGTGAATTGCAGAATTCAGTGAATCATCGAATCTTTGAACGCACATTGCGCCCTCTGGCATTCCTCAGGGCATGCCTGTTCGAGCGTCAATACAAACCCCCCTCACCCTCCTGGTGGTACTGGCGGAGGTGGGTCGCCCTCCCGGCGACAGGCCCACCCCGTCGAAACTCATGGGCCCGAGAGCCGACAGCTGCGACTGACATTCCAAGCGCTTTGAAAGCCAGAACCAGTCCGCGCCGATGTCTCGCGGTGCCCCGCTGGACCTCCCGTCCAGCGCAACACTCTGGGTTGACCTCGGATCAGGTAGGGATACCCGCTGAACTTAAGC	6908	cellular organisms	Eukaryota	Opisthokonta	Fungi	Dikarya	Ascomycota	saccharomyceta	Pezizomycotina			Pezizomycetes		Pezizales	Tuberaceae	Tuber	Tuber macrosporum
Tuber macrosporum	18S	Gleba	AAACGCGATATTTCTTGTGAATTGCAGAAGTGAATCATCAGTTTTTGAACGCACATTGCACTTTGGGGTATCCCCCAAAGTATACTTGTTTGAGCGTTGTTTCTCTCTTGGAATTGCTTTGCTCTTCTAAAATTTCGAATCAAATTCGTTTGAAAAACAACACTATTCAACCTCAGATCAAGTAGGATTACCCGCTGAACTTAAGC	31	cellular organisms	Eukaryota	Opisthokonta	Fungi	Dikarya	Ascomycota	saccharomyceta	Saccharomycotina			Saccharomycetes		Saccharomycetales	Dipodascaceae	Geotrichum	Geotrichum candidum
Tuber macrosporum	18S	Gleba	AAATGCGATAAGTAATGTGAATTGCAGAATTCAGTGAATCATCGAATCTTTGAACGCACATTGCGCCCCCTGGTATTCCGGGGGGCATGCCTGTTCGAGCGTCATTTCACCACTCAAGCCTCGCTTGGTATTGGGCAACGCGGTCCGCCGCGTGCCTCAAATCGTCCGGCTGGGTCTTCTGTCCCCTAAGCGTTGTGGAAACTATTCGCTAAAGGGTGTTCGGGAGGCTACGCCGTAAAACAACCCCATTTCTAAGGTTGACCTCGGATCAGGTAGGGATACCCGCTGAACTTAAGC	31	cellular organisms	Eukaryota	Opisthokonta	Fungi	Dikarya	Ascomycota	saccharomyceta	Pezizomycotina	leotiomyceta	dothideomyceta	Dothideomycetes		Cladosporiales	Cladosporiaceae	Cladosporium	Cladosporium sp.
Tuber macrosporum	18S	Gleba	AAATGCGATACCTAGTGTGAATTGCAGCCATCGTGAATCATCGAGTTCTTGAACGCACATTGCGCCCCTCGGCATTCCGGGGGGCATGCCTGTTTGAGCGTCGTTTCCATCTTGCGCGTGCGCAGAGTTGGGGGAGCGGAGCGGACGACGTGTAAAGAGCGTCGGAGCTGCGACTCGCCTGAAAGGGAGCGAAGCTGGCCGAGCGAACTAGACTTTTTTTCAGGGACGCTTGGCGGCCGAGAGCGAGTGTTGCGAGACAACAAAAAGCTCGACCTCAAATCAGGTAGGAATACCCGCTGAACTTAAGC	29	cellular organisms	Eukaryota	Opisthokonta	Fungi	Dikarya	Ascomycota	saccharomyceta	Saccharomycotina			Saccharomycetes		Saccharomycetales	Pichiaceae	Pichia	Pichia kudriavzevii
Tuber macrosporum	18S	Gleba	AAAGGCGAAACGTAATGTGAATCGCAACTAACAGTGAATCATTGAATCTTTGAACGCAGGCCGCATTTTGTAACATCACTTGTGTTGTTATAAAATATCTACGTATGAGTGTCAGCCCAATATCCTTTATTGGTTCAAGAAGATGTTCGTTTTTTAACGATACAAAATCTTGGATACATATTTTATGGAAACATAGTTATGTCTGGCCTCACATGTAGAAGATTACCCGCTGGATTTAAGC	17	cellular organisms	Eukaryota	Opisthokonta	Fungi	Dikarya	Basidiomycota		Agaricomycotina			Agaricomycetes		Boletales	Gomphidiaceae		XXX Gomphidiaceae
Tuber magnatum	18S	Gleba	AAATGCGATAGGTAATGTGAATTGCAGAACTCAGTGAATCATCGAATCTTTGAACGCACATTGCGCCCTCTGGCATTCCTCAGGGCATGCCTGTTTGAGCGTCACTGAAAACCCACTCACGGAATCACGTGGTGCTGATGGAGGTGGCTTGGTACCGCAGCGGCGGTGGCCGGGTCCACCCTGTCGAATTTCATTGGGAGGATGACGGACCCCCGGCTGCTGACTTTGTAGACATCGCCTTGAAATGCGTGCTAGTTGCCAGTCAGGCCCGGTCCTGCACGCTTGAGGATCCCTGCCATGGGATCCACTGTCCAACTGGGTTGACCTCAGATCAGGTAGGGATACCCGCTGAACTTAAGC	21129	cellular organisms	Eukaryota	Opisthokonta	Fungi	Dikarya	Ascomycota	saccharomyceta	Pezizomycotina			Pezizomycetes		Pezizales	Tuberaceae	Tuber	Tuber magnatum
Tuber magnatum	18S	Gleba	AAACGCGATATTTCTTGTGAATTGCAGAAGTGAATCATCAGTTTTTGAACGCACATTGCACTTTGGGGTATCCCCCAAAGTATACTTGTTTGAGCGTTGTTTCTCTCTTGGAATTGCTTTGCTCTTCTAAAATTTCGAATCAAATTCGTTTGAAAAACAACACTATTCAACCTCAGATCAAGTAGGATTACCCGCTGAACTTAAGC	1934	cellular organisms	Eukaryota	Opisthokonta	Fungi	Dikarya	Ascomycota	saccharomyceta	Saccharomycotina			Saccharomycetes		Saccharomycetales	Dipodascaceae	Geotrichum	Geotrichum candidum
Tuber magnatum	18S	Gleba	AAACGCGATATTTCTTGTGAATTGCAGAAGTGAATCATCAGTTTTTGAACGCACATTGCACTTTGGGGTATCCCCCAAAGTATACTTGTTTGAGCGTTGTTTCTCTCTTGGAATTGCTTTGCTCTTCTAAAATTTCGAATCAAATTCGTTTGAAAAACAACACTATTCAACCTCAGATCAGGTAGGGATACCCGCTGAACTTAAGC	222	cellular organisms	Eukaryota	Opisthokonta	Fungi	Dikarya	Ascomycota	saccharomyceta	Saccharomycotina			Saccharomycetes		Saccharomycetales	Saccharomycetales incertae sedis	Diutina	Diutina catenulata
Tuber magnatum	18S	Gleba	AAATGCGATACGTAATATGAATTGCAGATTTTGTGAATCATCGAATCTTTGAACGCACATTGCGCCCGTGGGTATTCCCGCGGGCATGCGTGTGTGAGCGGTTATCTCCCTCGCAGGTAATGGACATACGGCGTCAGCTGTTCCTCCAAAAAGTGATTGGTGTAGTATTACAGTTTACTCACAACCATACTTTTTCCCTCACACACGTAAGACTACCCGCTGAACTTAAGC	218	cellular organisms	Eukaryota	Opisthokonta	Fungi	Dikarya	Ascomycota	saccharomyceta	Saccharomycotina			Saccharomycetes		Saccharomycetales	Saccharomycetales incertae sedis	Diutina	Diutina catenulata
Tuber magnatum	18S	Gleba	AAATGCGATAGGTAATGTGAATTGCAGAACTCAGTGAATCATCGAATCTTTGAACGCACATTGCGCCCTCTGGCATTCCTCAGGGCATGCCTGTTTGAGCGTCACTGAAAACCCACTCACGGAATCACGTGGTGCTGATGGAGGTGGCTTGGTACCGCAGCGGCGGTGGCCGGGTCCACCCTGTCGAATTTCATTGGGAGGATGACGGACCCCCGGCTGCTGACTTTGTAGACATCGCCTTGAAATGCGTGCTAGTTGCCAGCCACGCCTGGTCCTGCCCGATTGCGGATCCCCGTCATGGGATCCACTGTCAAACTGGGTTGACCTCGGATCAGGTAGGGATACCTGCTAAACTTAAGC	139	cellular organisms	Eukaryota	Opisthokonta	Fungi	Dikarya	Ascomycota	saccharomyceta	Pezizomycotina			Pezizomycetes		Pezizales	Tuberaceae	Tuber	Tuber magnatum
Tuber magnatum	18S	Gleba	AAACGCGATATTTCTTGTGAATTGCAGAAGTGAATCATCAGTTTTTGAACGCACATTGCACTTTGGGGTATCCCCCAAAGTATACTTGTTTGAGCGTTGTTTCTCTCTTGGAATTGCATTGCTTTTCTAAAATTTCGAATCAAATTCGTTTGAAAAACAACACTATTCAACCTCAGATCAAGTAGGATTACCCGCTGAACTTAAGC	88	cellular organisms	Eukaryota	Opisthokonta	Fungi	Dikarya	Ascomycota	saccharomyceta	Saccharomycotina			Saccharomycetes		Saccharomycetales	Dipodascaceae	Geotrichum	Geotrichum candidum
Tuber magnatum	18S	Gleba	AAATGCGATACCTAGTGTGAATTGCAGCCATCGTGAATCATCGAGTTCTTGAACGCACATTGCGCCCCTCGGCATTCCGGGGGGCATGCCTGTTTGAGCGTCGTTTCCATCTTGCGCGTGCGCAGAGTTGGGGGAGCGGAGCGGACGACGTGTAAAGAGCGTCGGAGCTGCGACTCGCCTGAAAGGGAGCGAAGCTGGCCGAGCGAACTAGACTTTTTTTCAGGGACGCTTGGCGGCCGAGAGCGAGTGTTGCGAGACAACAAAAAGCTCGACCTCAAATCAGGTAGGAATACCCGCTGAACTTAAGC	18	cellular organisms	Eukaryota	Opisthokonta	Fungi	Dikarya	Ascomycota	saccharomyceta	Saccharomycotina			Saccharomycetes		Saccharomycetales	Pichiaceae	Pichia	Pichia kudriavzevii
Tuber magnatum	18S	Gleba	AAATGCGATAGGTAATGTGAATTGCAGAACTCAGTGAATCATCGAATCTTTGAACGCACATTGCGCCCTCTGGCATTCCTCAGGGCATGCCTGTTTGAGCGTCGTTTCCATCTTGCGCGTGCGCAGAGTTGGGGGAGCGGAGCGGACGACGTGTAAAGAGCGTCGGAGCTGCGACTCGCCTGAAAGGGAGCGAAGCTGGCCGAGCGAACTAGACTTTTTTTCAGGGACGCTTGGCGGCCGAGAGCGAGTGTTGCGAGACAACAAAAAGCTCGACCTCAAATCAGGTAGGAATACCCGCTGAACTTAAGC	13	cellular organisms	Eukaryota	Opisthokonta	Fungi	Dikarya	Ascomycota	saccharomyceta	Saccharomycotina			Saccharomycetes		Saccharomycetales	Pichiaceae	Pichia	Pichia kudriavzevii
Tuber magnatum	18S	Gleba	AAGTGCGATAAGCAATGCGAATTGCAGAACCGTGAGTCATCAGATTTTTGAACGCAACTGGCACCCAGGGGTTCCCCCCTGGGTATGCTTCTTTCAGTGTGTGTTTCTCTCCTCACCCAAATCATAATGTGGTAGATGCCCTTCTACTGCTAAACACGAAAGCACTCTGCCTTTGCAGTGACTAGCAATAGTCACACTCAATGCAGACGTCACATTTTATAATGTGAACTCATTGATGGTGAAGACAGCGTAGTGAAAACTACAAGTGCTTAGACACATTAATTTTCTCAGCATCTGAAATGAAGTAGGACCACCCGCTGAACTTAAGC	10	cellular organisms	Eukaryota	Sar	Alveolata	Ciliophora	Ciliophora					Spirotrichea		Choreotrichida	Strobilidiidae	Pelagostrobilidium	Pelagostrobilidium sp.
Tuber magnatum	18S	Gleba	AAATGCGATAGGTAATGTGAATTGCAGAACTCAGTGAATCATCGAATCTTTGAACGCACATTGCGCCCTCTGGCATTCCTCAGGGCATGCCTGTTTGAGCGTCCTTTCTCTCTCGAAAGGTTGTGGGCGGTATGCTGGTAAGCATCCGCCTGAAAGGTAATCGTCACGACTGTCAAGTAAGTCGCAGACTAACCAATATCGACCTCAAATCAGGTAGGACTACCCGCTGAACTTAAGC	4	cellular organisms	Eukaryota	Opisthokonta	Fungi	Dikarya	Ascomycota	saccharomyceta	Saccharomycotina			Saccharomycetes		Saccharomycetales	Saccharomycetales incertae sedis	Diutina	Diutina catenulata
Tuber magnatum	18S	Gleba	AAACGCGATATTTCTTGTGAATTGCAGAAGTGAATCATCAGTTTTTGAACGCACATTGCACTTTGGGGTATCCCCCAAAGTATACTTGTTTGAGCGTTGTTTCTCTCTTGGAATTGCTTTGCTCTTCTAAAATTTCGAATCAAATTCGTTTGAAAAACAACACTATTCAACCTCAGATCAAGTAGGATTACCCGCTGAACTTAAGC	13	cellular organisms	Eukaryota	Opisthokonta	Fungi	Dikarya	Ascomycota	saccharomyceta	Pezizomycotina	leotiomyceta	dothideomyceta	Dothideomycetes	Dothideomycetidae	Cladosporiales	Cladosporiaceae	Cladosporium	Cladosporium sphaerospermum
Tuber magnatum	18S	Gleba	AAATGCGATACCTGGTGTGAATTGCAGAATCCCGCGAACCATCGAGTCTTTGAACGCAAGTTGCGCCCGAGGCCACTCGGCCGAGGGCACGCCTGCCTGGGCGTCACGCCAAAACACGCTCCCAACCACTCTCAACGGGAATCGGGATGCGGCATCTGGTCCCTCGTCTCTCAAGGGACGGTGGACCGAAGATTGGGCTGCCGGCGTACCGCGCCGGACACAGCGCATGGTGGGCGTCCTCGCTTTATCAATGCAGTGCATCCGGCGCGCAGCTGGCATTATGGCCTTTGAACGACCCAACAAACGAAGCGCACGTCGCTTCGACCGCGACCCCAGGTCAGGCGGGACTACCCGCTGAGTTTAAGC	311	cellular organisms	Eukaryota	Opisthokonta	Fungi	Dikarya	Ascomycota	saccharomyceta	Saccharomycotina			Saccharomycetes		Saccharomycetales	Dipodascaceae	Geotrichum	Geotrichum candidum
Tuber magnatum	18S	Gleba	AAATGCGATACCTGGTGTGAATTGCAGAATCCCGCGAACCATCGAGTCTTTGAACGCAAGTTGCGCCCGAGGCCACTCGGCCGAGGGCACGCCTGCCTGGGCGTCACGCCAAAACACGCTCCCAACCACCCTCAACGGGATTCGGGATGCGGCATCTGGTCCCTCGTCTCTCAAGGGACGGTGGACCGAAGATTGGGCTGCCGGCGTACCGCGCCGGACACAGCGCATGGTGGGCGTCCTCGCTTTATCAATGCAGTGCATCCGGCGCGCAGCTGGCATTATGGCCTTTGAACGACCCAACAAACGAAGCGCACGTCGCTTCGACCGCGACCCCAGGTCAGGCGGGACTACCCGCTGAGTTTAAGC	209	cellular organisms	Eukaryota		Viridiplantae		Streptophyta					Magnoliopsida		Poales	Triticeae	Triticum	Triticum sp.
Tuber magnatum	18S	Gleba	AAATGCGATACGTAATATGAATTGCAGATTTTGTGAATCATCGAATCTTTGAACGCACATTGCGCCCGTGGGTATTCCCGCGGGCATGCGTGTGTGAGCGGTTATCTCCCTCGCAGGTAATGGACATACGGCGTCAGCTGTTCCTCCAAAAAGTGATTGGTGTAGTATTACAGTTTACTCACAACCATACTTTTTCCCTCACACACGTAAGACTACCCGCTGAACTTAAGC	139	cellular organisms	Eukaryota		Viridiplantae		Streptophyta					Magnoliopsida		Poales	Triticeae	Triticum	Triticum sp.
Tuber magnatum	18S	Gleba	AAATGCGATAGGTAATGTGAATTGCAGAACTCAGTGAATCATCGAATCTTTGAACGCACATTGCGCCCCCTGGTATTCCGGGGGGCATGCCTGTTCGAGCGTCATTTCACCACTCAAGCCTCGCTTGGTATTGGGCGACGCGGTCCGCCGCGCGCCTCAAATCGACCGGCTGGGTCTTCTGTCCCCTCAGCGTTGTGGAAACTATTCGCTAAAGGGTGCCACGGGAGGCCACGCCGAAAAACAAACCCATTTCTAAGGTTGACCTCGGATCAGGTAGGGATACCCGCTGAACTTAAGC	75	cellular organisms	Eukaryota		Viridiplantae		Streptophyta					Magnoliopsida		Poales	Triticeae	Triticum	Triticum sp.
Tuber magnatum	18S	Gleba	AAATGCGATAGGTAATGTGAATTGCAGAACTCAGTGAATCATCGAATCTTTGAACGCACATTGCGCCCTCTGGCATTCCTCAGGGCATGCCTGTTTGAGCGTCACTGAAAACCCACTCACGGAATCACGTGGTGCTGATGGAGGTGGCTTGGTACCGCAGCGGCGGTGGCCGGGTCCACCCTGTCGAATTTCATTGGGAGGATGACGGACCCCCGGCTGCTGACTTTGTAGACATCGCCTTGAAATGCGTGCTAGTTGCCAGTCAGGCCCGGTCCTGCACGCTTGAGGATCCCTGCCATGGGATCCACTGTCCAACTGGGTTGACCTCAGATCAGGTAGGGATACCCGCTGAACTTAAGC	14914	cellular organisms	Eukaryota	Opisthokonta	Fungi	Dikarya	Ascomycota	saccharomyceta	Pezizomycotina			Pezizomycetes		Pezizales	Tuberaceae	Tuber	Tuber magnatum
Tuber macrosporum	18S	Peridium	AAATGCGATAAGTAATGTGAATTGCAGAATTCAGTGAATCATCGAATCTTTGAACGCACATTGCGCCCTCTGGCATTCCTCAGGGCATGCCTGTTCGAGCGTCAATACAAACCCCCCTCACCCTCCTGGTGGTACTGGCGGAGGTGGGTCGCCCTCCCGGCGACAGGCCCACCCCGTCGAAACTCATGGGCCCGAGAGCCGACAGCTGCGACTGACATTCCAAGCGCTTTGAAAGCCAGAACCAGTCCGCGCCGATGTCTCGCGGTGCCCCGCTGGACCTCCCGTCCAGCGCAACACTCTGGGTTGACCTCGGATCAGGTAGGGATACCCGCTGAACTTAAGC	89	cellular organisms	Eukaryota	Opisthokonta	Fungi	Dikarya	Ascomycota	saccharomyceta	Pezizomycotina	leotiomyceta		Eurotiomycetes		Eurotiales	Aspergillaceae	Aspergillus	Aspergillus westerdijkiae
Tuber macrosporum	18S	Peridium	AAATGCGATAAGTAATGTGAATTGCAGAATTCAGTGAATCATCGAATCTTTGAACGCACATTGCGCCCCCTGGTATTCCGGGGGGCATGCCTGTTCGAGCGTCATTTCACCACTCAAGCCTCGCTTGGTATTGGGCAACGCGGTCCGCCGCGTGCCTCAAATCGACCGGCTGGGTCTTCTGTCCCCTAAGCGTTGTGGAAACTATTCGCTAAAGGGTGTTCGGGAGGCTACGCCGTAAAACAACCCCATTTCTAAGGTTGACCTCGGATCAGGTAGGGATACCCGCTGAACTTAAGC	19	cellular organisms	Eukaryota	Opisthokonta	Fungi	Dikarya	Ascomycota	saccharomyceta	Pezizomycotina	leotiomyceta	dothideomyceta	Dothideomycetes	Dothideomycetidae	Cladosporiales	Cladosporiaceae	Cladosporium	Cladosporium sp.
Tuber macrosporum	18S	Peridium	AAATGCGATAAGTAATATGAATTGCAGATTTTCGTGAATCATCGAATCTTTGAACGCACATTGCACCCTCTGGTATTCCAGAGGGTATGCCTGTTTGAGCGTCATTTCTCTCTCAAACCCTCGGGTTTGGTATTGAGTGATACTCTTAGTCGAACTAGGCGTTTGCTTGAAATATATTGGCACGAGTAGTGTTGAACAGTGTTGTCTGAACATCAATGTATTAGGTTTATCCAACTCGTTGATACAGGTGGTGCGATTCTTCATTAGGCTTTGCCTTATAAAACACAAACAAGTTTGACCTCAAATCAGGTAGGATTACCCGCTGAACTTAAGC	18	cellular organisms	Eukaryota	Opisthokonta	Fungi	Dikarya	Ascomycota	saccharomyceta	Saccharomycotina			Saccharomycetes		Saccharomycetales	Debaryomycetaceae	Debaryomyces	Debaryomyces sp.
Tuber macrosporum	18S	Peridium	AAATGCGATAAGTAATATGAATTGCAGATATTCGTGAATCATCGAATCTTTGAACGCACATTGCGCCCTCTGGTATTCCGGAGGGCATGCCTGTTTGAGCGTCATTTCTCCCTCAAACCCCCGGGTTTGGTGATGAGCAATACGCCAGGTTTGCTTGAAAGTTAGGAGGAGTATTTATAACAATGTATTAGGTCTAACCACTCCATTGTGCTTAATAAAAGCTCCAATCTATATTTCAAACTTCGACCTCAAATCAGGTAGGATTACCCGCTGAACTTAAGC	10	cellular organisms	Eukaryota	Opisthokonta	Fungi	Dikarya	Ascomycota	saccharomyceta	Saccharomycotina			Saccharomycetes		Saccharomycetales	Debaryomycetaceae	Lodderomyces	Lodderomyces elongisporus
Tuber macrosporum	18S	Peridium	AAATGCGATAAGTAATATGAATTGCAGATTTTCGTGAATCATCGAATCTTTGAACGCACATTGCACCTTGTGGTATTCCACAAGGTATGCCTGTTTGAGCGTCATTTCTCCCTCAACCCCCGCGGGTTGGCGTTGAATGGCACGAGCTCTTAGTCAGTCCATTCGAAAAGTATTTTTCTTGTGTTGTTATTTTCTAATTTAGTAGTGACAACCACACTAAAAACACATTTTCCTCAAATCAGGTAGGACTACCCGCTGAACTTAAGC	7	cellular organisms	Eukaryota	Opisthokonta	Fungi	Dikarya	Ascomycota	saccharomyceta	Saccharomycotina			Saccharomycetes		Saccharomycetales	Debaryomycetaceae	Hyphopichia	Hyphopichia burtonii
Tuber macrosporum	18S	Peridium	AAACGCGATATTTCTTGTGAATTGCAGAAGTGAATCATCAGTTTTTGAACGCACATTGCACTTTGGGGTATCCCCCAAAGTATACTTGTTTGAGCGTTGTTTCTCTCTTGGAATTGCTTTGCTCTTCTAAAATTTCGAATCAAATTCGTTTGAAAAACAACACTATTCAACCTCAGATCAAGTAGGATTACCCGCTGAACTTAAGC	676	cellular organisms	Eukaryota	Opisthokonta	Fungi	Dikarya	Ascomycota	saccharomyceta	Saccharomycotina			Saccharomycetes		Saccharomycetales	Dipodascaceae	Geotrichum	Geotrichum candidum
Tuber macrosporum	18S	Peridium	AAATGCGATAAGTAATGCGAATTGCAGAATTCCAGTGAGTCATCGAATCTTTGAACGCACATTGCGCCCTTTGGTATTCCGAAGGGCATGCCTGTTCGAGCGTCATTATCACCCCTCAAGCCCTCGGCTTGGTGTTGGACGGTTTGGTGGAGGCCCCCTCGGGGGCTCCTGCCCCTCCCAAAGACAATGACGGCGGCCTCGTTGGACCCCCGGTACACTGAGTTCTTCACGGGACACGTATCGGACACATGGGTTTACGGGACACGGTCTGCCTCCCCTCAGGGAGAATCTTTCTAAGGTTGACCTCGGATCAGGTAGGGATACCCGCTGAACTTAAGC	1109	cellular organisms	Eukaryota	Opisthokonta	Fungi	Dikarya	Ascomycota	saccharomyceta	Pezizomycotina	leotiomyceta		Eurotiomycetes		Chaetothyriales	Herpotrichiellaceae	Exophiala	Exophiala equina
Tuber macrosporum	18S	Peridium	AAATGCGATAAGTAGTGTGAATTGCAGAATTCAGTGAATCATCGAATCTTTGAACGCACATTGCGCCCTTTGGTATTCCAAAGGGCATGCCTGTTCGAGCGTCATTTGTACCCTCAAGCTTTGCTTGGTGTTGGGCGTCTTGTCTCTAGCTTTGCTGGAGACTCGCCTTAAAGTAATTGGCAGCCGGCCTACTGGTTTCGGAGCGCAGCACAAGTCGCACTCTCTATCAGCAAAGGTCTAGCATCCATTAAGCCTTTTTTTCAACTTTTGACCTCGGATCAGGTAGGGATACCCGCTGAACTTAAGC	40	cellular organisms	Eukaryota	Opisthokonta	Fungi	Dikarya	Ascomycota	saccharomyceta	Pezizomycotina	leotiomyceta	dothideomyceta	Dothideomycetes		Pleosporales	Pleosporaceae	Alternaria	Alternaria sp.
Tuber macrosporum	18S	Peridium	AAATGCGATAAGTAATGTGAATTGCAGAATTCAGTGAATCATCGAATCTTTGAACGCACCTTGCGCTCCTTGGCATTCCGAGGAGCATGCCTGTTTGAGTGTCATTAAATTCTCAATCCCTTCAATCTTGTGTTGTTTGGTGATTGGATTATGGGGGTTTGCTGGCCTTGTTCAGCTCCCCTTAAAAGCATTAGCAGGACATTATGCCATCTGTGCTTTGTATGATATTTATCTATACACTGTACTCATTGTGCACAACTGCTTCTAACTGTCACTTCTGACATTTGACCAATTTGACCTCAAATCAGGTAGGACTACCCGCTGAACTTAAGC	13	cellular organisms	Eukaryota	Opisthokonta	Fungi	Dikarya	Basidiomycota		Agaricomycotina	Agaricomycetes		Agaricomycetes		Agaricales	Pluteaceae	Pluteus	Pluteus cervinus
Tuber macrosporum	18S	Peridium	AAATGCGATACGTAATATGAATTGCAGATTTTGTGAATCATCGAATCTTTGAACGCACATTGCGCCCGTGGGTATTCCCGCGGGCATGCGTGTGTGAGCGGTTATCTCCCTCGCAGGTAATGGACATACGGCGTCAGCTGTTCCTCCAAAAAGTGATTGGTGTAGTATTACAGTTTACTCACAACCATACTTTTTCCCTCACACACGTAAGACTACCCGCTGAACTTAAGC	36	cellular organisms	Eukaryota	Opisthokonta	Fungi	Dikarya	Ascomycota	saccharomyceta	Saccharomycotina			Saccharomycetes		Saccharomycetales	Saccharomycetales incertae sedis	Diutina	Diutina catenulata
Tuber macrosporum	18S	Peridium	AAATGCGATAAGTAATGTGAATTGCAGAATTCAGTGAATCATCGAATCTTTGAACGCACCTTGCACCCTTTGGTATTCCGAAGGGTATGCTCGTTTGAGTGTCATTGTACTCTCACACTCTCTAATGCTTGCATTAGGAGCGGTGGACTTGGGTGTTGCTGCTTCACGGTGGCTCACCTGAAATGCAGTAGTGCACCTCCTGGTTGGACATAGTACGGCGTGATAAGTGTCTTCGCCGGCGCCTCGAAAGAGGGTGGCCGATTGGGAGCTCTGGGCTTCTAACTGTCTTAGGACACTCTCTGACAACTTGACCTCAAATCGAGTAGGACTACCCGCTGAACTTAAGC	575	cellular organisms	Eukaryota	Opisthokonta	Fungi	Dikarya	Basidiomycota		Agaricomycotina			Agaricomycetes		Sebacinales	Sebacinaceae	Sebacina	Sebacina sp.
Tuber macrosporum	18S	Peridium	AAATGCGATAAGTAATGTGAATTGCAGAATTCAGTGAATCATCGAATCTTTGAACGCAGCTTGCGCTCTCTGGTATTCCGGAGAGCATGCCTGTTTCAGTGTCATGAAATCTCAACCACTAGGGTTTCCTAATGGATTGGATTTGGGTGTTGCGATCTCTGATCGCTCGCCTTAAAAGAGTTAGCAAGTTTGACATATATGTCTGGTGTAATAAGTTTCACTGGGTCCATTGTGTTGAAGCGTGCTTCTAATCGTCCGCAAGGACAATTACTTTGACTCTGGCCTGAAATCAGGTAGGACTACCCGCTGAACTTAAGC	8	cellular organisms	Eukaryota	Opisthokonta	Fungi	Dikarya	Basidiomycota		Agaricomycotina			Tremellomycetes		Trichosporonales	Trichosporonaceae	Trichosporon	Trichosporon sp.
Tuber macrosporum	18S	Peridium	AAATGCGATAAGTAATGTGAATTGCAGAATTCAGTGAATCATCGAATCTTTGAACGCACATTGCGCCCTCTGGCATTCCTCAGGGCATGCCTGTTCGAGCGTCAATACAAACCCCCCTCACCCTCCTGGTGGTACTGGCGGAGGTGGGTCGCCCTCCCGGCGACAGGCCCACCCCGTCGAAACTCATGGGCCCGAGAGCCGACAGCTGCGACTGACATTCCAAGCGCTTTGAAAGCCAGAACCAGTCCGCGCCGATGTCTCGCGGTGCCCCGCTGGACCTCCCGTCCAGCGCAACACTCTGGGTTGACCTCGGATCAGGTAGGGATACCCGCTGAACTTAAGC	8969	cellular organisms	Eukaryota	Opisthokonta	Fungi	Dikarya	Ascomycota	saccharomyceta	Pezizomycotina			Pezizomycetes		Pezizales	Tuberaceae	Tuber	Tuber macrosporum
Tuber macrosporum	18S	Peridium	AAATGCGATAAGTAATGTGAATTGCAGAATTCAGTGAATCATCGAATCTTTGAACGCACCTTGCACTCCTTGGTATTCCGAGGAGTATGCCTGTTTGAGTGTCATGAAATCATCAACTTCATAGTTTTGTTACTGTGAAGCTTGGACTTGGAAGCTGCTGGCTCTGTCGGCTCTTCTTAAATATATTAGCTGCTTGTCCGTGGGTTGGCTCAGAGTGTGATAAGTATCTGCACTTGGTGGCTGCTCGCTTTGGATGTGGCTTCTAATCGTCTTTGGACAATTTTTAAGATCTGACCTCAAATCAGGTAGGACTACCCGCTGAACTTAAGC	22	cellular organisms	Eukaryota	Opisthokonta	Fungi	Dikarya	Basidiomycota		Agaricomycotina			Agaricomycetes	Agaricomycetes		Xenasmatellaceae	Xenasmatella	Xenasmatella sp.
Tuber magnatum	18S	Peridium	AAATGCGATAGGTAATGTGAATTGCAGAACTCAGTGAATCATCGAATCTTTGAACGCACATTGCGCCCTCTGGCATTCCTCAGGGCATGCCTGTTTGAGCGTCACTGAAAACCCACTCACGGAATCACGTGGTGCTGATGGAGGTGGCTTGGTACCGCAGCGGCGGTGGCCGGGTCCACCCTGTCGAATTTCATTGGGAGGATGACGGACCCCCGGCTGCTGACTTTGTAGACATCGCCTTGAAATGCGTGCTAGTTGCCAGTCAGGCCCGGTCCTGCACGCTTGAGGATCCCTGCCATGGGATCCACTGTCCAACTGGGTTGACCTCAGATCAGGTAGGGATACCCGCTGAACTTAAGC	5	cellular organisms	Eukaryota	Opisthokonta	Fungi	Dikarya	Basidiomycota		Agaricomycotina			Agaricomycetes		Agaricales	Agaricineae		XXX Agaricaceae
Tuber magnatum	18S	Peridium	AAACGCGATATTTCTTGTGAATTGCAGAAGTGAATCATCAGTTTTTGAACGCACATTGCACTTTGGGGTATCCCCCAAAGTATACTTGTTTGAGCGTTGTTTCTCTCTTGGAATTGCTTTGCTCTTCTAAAATTTCGAATCAAATTCGTTTGAAAAACAACACTATTCAACCTCAGATCAAGTAGGATTACCCGCTGAACTTAAGC	31	cellular organisms	Eukaryota	Opisthokonta	Fungi	Dikarya	Ascomycota	saccharomyceta	Pezizomycotina	leotiomyceta		Eurotiomycetes		Chaetothyriales	Herpotrichiellaceae	Cladophialophora	Cladophialophora lanosa
Tuber magnatum	18S	Peridium	AAACGCGATATTTCTTGTGAATTGCAGAAGTGAATCATCAGTTTTTGAACGCACATTGCACTTTGGGGTATCCCCCAAAGTATACTTGTTTGAGCGTTGTTTCTCTCTTGGAATTGCTTTGCTCTTCTAAAATTTCGAATCAAATTCGTTTGAAAAACAACACTATTCAACCTCAGATCAGGTAGGGATACCCGCTGAACTTAAGC	5	cellular organisms	Eukaryota	Opisthokonta	Fungi	Dikarya	Basidiomycota		Agaricomycotina			Agaricomycetes		Agaricales	Cortinariaceae	Cortinarius	Cortinarius sp.
Tuber magnatum	18S	Peridium	AAATGCGATACGTAATATGAATTGCAGATTTTGTGAATCATCGAATCTTTGAACGCACATTGCGCCCGTGGGTATTCCCGCGGGCATGCGTGTGTGAGCGGTTATCTCCCTCGCAGGTAATGGACATACGGCGTCAGCTGTTCCTCCAAAAAGTGATTGGTGTAGTATTACAGTTTACTCACAACCATACTTTTTCCCTCACACACGTAAGACTACCCGCTGAACTTAAGC	2206	cellular organisms	Eukaryota	Opisthokonta	Fungi	Dikarya	Ascomycota	saccharomyceta	Saccharomycotina			Saccharomycetes		Saccharomycetales	Dipodascaceae	Geotrichum	Geotrichum candidum
Tuber magnatum	18S	Peridium	AAATGCGATAGGTAATGTGAATTGCAGAACTCAGTGAATCATCGAATCTTTGAACGCACATTGCGCCCTCTGGCATTCCTCAGGGCATGCCTGTTTGAGCGTCACTGAAAACCCACTCACGGAATCACGTGGTGCTGATGGAGGTGGCTTGGTACCGCAGCGGCGGTGGCCGGGTCCACCCTGTCGAATTTCATTGGGAGGATGACGGACCCCCGGCTGCTGACTTTGTAGACATCGCCTTGAAATGCGTGCTAGTTGCCAGCCACGCCTGGTCCTGCCCGATTGCGGATCCCCGTCATGGGATCCACTGTCAAACTGGGTTGACCTCGGATCAGGTAGGGATACCTGCTAAACTTAAGC	220	cellular organisms	Eukaryota	Opisthokonta	Fungi	Dikarya	Ascomycota	saccharomyceta	Saccharomycotina			Saccharomycetes		Saccharomycetales	Dipodascaceae	Geotrichum	Geotrichum candidum
Tuber magnatum	18S	Peridium	AAATGCGATACCTAGTGTGAATTGCAGCCATCGTGAATCATCGAGTTCTTGAACGCACATTGCGCCCCTCGGCATTCCGGGGGGCATGCCTGTTTGAGCGTCGTTTCCATCTTGCGCGTGCGCAGAGTTGGGGGAGCGGAGCGGACGACGTGTAAAGAGCGTCGGAGCTGCGACTCGCCTGAAAGGGAGCGAAGCTGGCCGAGCGAACTAGACTTTTTTTCAGGGACGCTTGGCGGCCGAGAGCGAGTGTTGCGAGACAACAAAAAGCTCGACCTCAAATCAGGTAGGAATACCCGCTGAACTTAAGC	5	cellular organisms	Eukaryota	Opisthokonta	Fungi	Dikarya	Basidiomycota		Agaricomycotina			Agaricomycetes		Agaricales	Entolomataceae	Entoloma	Entoloma sp.
Tuber magnatum	18S	Peridium	AAATGCGATACGTAATGTGAATTGCAGAATTCAGTGAATCATCGAATCTTTGAACGCACCTTGCGCTCCTTGGTATTCCGAGGAGCATGCCTGTTTGAGTGTCATGAAATCTTCAACCCACCTCTTTCTTAGTGAATCTGGTGGTGCTTGGTTTCTGAGCGCTGCTCTGCTTCGGCTTAGCTCGTTCGTAATGCATTAGCATCCGCAACCGAACTTCGGATTGACTTGGCGTAATAGACTATTCGCTGAGGATTCTAGTCTCGTACTAGAGCCGGGTTGGGTTAAAGGAAGCTTCTAATCCTAAAGTCTATTTTTTGATTAGATCTCAAATCAGGTAGGACTACCCGCTGAACTTAAGC	46	cellular organisms	Eukaryota	Opisthokonta	Fungi	Dikarya	Basidiomycota		Agaricomycotina			Agaricomycetes	Agaricomycetes	Polyporales	Phanerochaetaceae	Phlebiopsis	Phlebiopsis sp.
Tuber magnatum	18S	Peridium	AAATGCGATAAGTAATGTGAATTGCAGAATTCAGTGAATCATCGAATCTTTGAACGCACCTTGCGCTCCCTGGTATTCCGGGGAGCATGCCTGTTTGAGTGTCATGGAATTCTCAACTCTTAATACTTTTTTGTATCAAGAGCTTGGACTTGGAGGCTTGTGCTGGCTGCTCGTTCAGTCGGCTCCTCTGAAATGCATTAGCGTGAATTAATATGGATCGCTTCGGTGTGATAATTATCTGCGCCGTAGTCGTGAAGTACTTGATAACGTTTACGCTTCTAATCGTCCTTCACGGGACAATTAAACCCTGACTTTTTGACCTCAAATCAGGTAGGACTACCCGCTGAACTTAAGC	51	cellular organisms	Eukaryota	Opisthokonta	Fungi	Dikarya	Ascomycota	saccharomyceta	Saccharomycotina			Saccharomycetes		Saccharomycetales	Pichiaceae	Pichia	Pichia kudriavzevii
Tuber magnatum	18S	Peridium	AAATGCGATAAGTAATGCGAATTGCAGAATTCCAGTGAGTCATCGAATCTTTGAACGCACATTGCGCCCTTTGGTATTCCGAAGGGCATGCCTGTTCGAGCGTCATTATCACCCCTCAAGCCCCGTGCTTGGTGTTGGACGGCTCTGGTCGAGTAATGTCGACCCCTCCTAAAGACAATGACGGCGGCCTGTGGAACCCCCGGTACACTGAGCTTTTAACCGAGCACGTATCGGACGAGGGTGCCCGGGACACGGTCCATCTTCCCTTCAGCGGGAAAGCTTTCAAAGGTTGACCTCGGATCAGGTAGGAATACGCGCTGAACTTAAGC	17	cellular organisms	Eukaryota	Opisthokonta	Fungi	Dikarya	Ascomycota	saccharomyceta	Pezizomycotina	leotiomyceta	dothideomyceta	Dothideomycetes		Pleosporales	Pleosporineae	Alternaria	Alternaria sp.
Tuber magnatum	18S	Peridium	AAATGCGATAAGTAATGTGAATTGCAGAATTCAGTGAATCATCGAATCTTTGAACGCACCTTGCACCCTTTGGTATTCCGAAGGGTATGCTCGTTTGAGTGTCATTGTACTCTCACACTTCTGATCCTTTGGATTGGGAGCGGTGGACTTGGGTGTTGCTGCTTTACTGTGGCTCACCTCAAATGCATTAGTGCAACTCTTGGTTGGACATAGTACGGCGTGATAAGTGTCTTCGCCGGCGCCTCGCAAGAGGGTGGCTGATCAGGAGCTCTGTGCTTTCCAACTGTCTTCAGACAACAACTGACAACTTGACCTCAAATCGAGTAGGACCACCCGCTGAACTTAAGC	210	cellular organisms	Eukaryota	Opisthokonta	Fungi	Dikarya	Ascomycota	saccharomyceta	Saccharomycotina			Saccharomycetes		Saccharomycetales	Saccharomycetaceae	Diutina	Diutina catenulata
Tuber magnatum	18S	Peridium	AAATGCGATAAGTAGTGTGAATTGCAGAATTCAGTGAATCATCGAATCTTTGAACGCACATTGCGCCCTTTGGTATTCCAAAGGGCATGCCTGTTCGAGCGTCATTTGTACCCTCAAGCTTTGCTTGGTGTTGGGCGTCTTGTCTCTAGCTTTGCTGGAGACTCGCCTTAAAGTAATTGGCAGCCGGCCTACTGGTTTCGGAGCGCAGCACAAGTCGCACTCTCTATCAGCAAAGGTCTAGCATCCATTAAGCCTTTTTTTCAACTTTTGACCTCGGATCAGGTAGGGATACCCGCTGAACTTAAGC	27	cellular organisms	Eukaryota	Opisthokonta	Fungi	Dikarya	Basidiomycota	Agaricomycotina	Agaricomycetes			Agaricomycetes	Sebacinales	Serendipitaceae	Serendipitaceae		XXX Serendipitaceae
Tuber magnatum	18S	Peridium	AAATGCGATAAGTAATGTGAATTGCAGATACAGTGAATCATCGAATCTTTGAACGCAAATGGCACTCTATGGTATTCCGTAGAGTACGTCTGTTTGAGCGTCGCGAACATCTCTATAATTAGTTTTTTTTTAAAATTGATTATGGGTTTTGAGGTTGTCATGTATAATGACTCCCTTTAAAATGATTAGTGATGACCTTATGAATGGGTTAATACTGTGTGTTATAATGGATTACATCCATCACCAGTCAGAGAGTAATCTCGCCTTAGTAATTTGTAGTGATTGCTTCTAACTGCCAATTTGGCAAAACCTGATCAAATCGACCTCAAATCAGATGGGATTACCCGCTGAACTTAAGC	47	cellular organisms	Eukaryota	Opisthokonta	Fungi	Dikarya	Basidiomycota		Pucciniomycotina			Microbotryomycetes		Sporidiobolales	Sporidiobolaceae	Rhodotorula	Rhodotorula kratochvilovae
Tuber magnatum	18S	Peridium	GCAGCGAAATGCGATAGGTAATGTGAATTGCAGAACTCAGTGAATCATCGAATCTTTGAACGCACATTGCGCCCTCTGGCATTCCTCAGGGCATGCCTGTTTGAGCGTCACTGAAAACCCACTCACGGAATCACGTGGTGCTGATGGAGGTGGCTTGGTACCGCAGCGGCGGTGGCCGGGTCCACCCTGTCGAATT	26285	cellular organisms	Eukaryota	Opisthokonta	Fungi	Dikarya	Ascomycota	saccharomyceta	Pezizomycotina			Pezizomycetes		Pezizales	Tuberaceae	Tuber	Tuber magnatum
Tuber magnatum	18S	Peridium	AAATGCGATAAGTAATGTGAATTGCAGAATTCAGTGAATCATCGAATCTTTGAACGCACCTTGCGCTCCTTGGTATTCCGAGGAGCATGCCTGTTTGAGTGTCATTTAATTCTCAACCCATCTAGCTTTTGTTAGCTTGTATGTGGCTTGGATATGGGGGTTTTGTGCAGGCCTACACACAGGTCAGCTCCCCTTAAATGTATTAGCGGAACGGTTTGCGAATCCGTCACTGGTGTGATAATTATCTACGCCAATTGACAATGGAACGCTCTCTGTCTGTTCAGCTTCTAACAGTCCCTTCATTGTGGACAACATCATTTGAACCTTTGACCTCAAATCAGGTAGGACTACCCGCTGAACTTAAGC	163	cellular organisms	Eukaryota	Opisthokonta	Fungi	Dikarya	Ascomycota	saccharomyceta	Pezizomycotina			Pezizomycetes		Pezizales	Tuberaceae	Tuber	Tuber magnatum
Tuber magnatum	18S	Peridium	AAATGCGATAAGTAATGTGAATTGCAGAATTCAGTGAATCATCGAATCTTTGAACGCACCTTGCGCTCCTTGGTATTCCGAGGAGCATACCTGTTTGAGTGTCGTGAAATTCTCAACCTCTCTAGTTTTTATAAGCTAGTTAGGCTTGGATTTTGGAGGTTGCTGGCTTCTCAGAAATCAGCTCTTCTTAAATATATTAGCAAAGTCTTTGCTGGCCATCTTTGGTATGATAATTATCTATATCATTGAGAATCAGCTTCCGTCTCGGAAGGGTTTTGCTTCTAATGGTCTATATAGACAACTTGACAATTTGACCTCAAATCAGGTAGGACTACCCGCTGAACTTAAGC	8	cellular organisms	Eukaryota	Opisthokonta	Fungi	Dikarya	Ascomycota	saccharomyceta	Pezizomycotina			Pezizomycetes		Pezizales	Tuberaceae	Tuber	Tuber magnatum
Tuber magnatum	18S	Peridium	AAATGCGATAGGTAATGTGAATTGCAGAATTCAGTGAATCATCGAATCTTTGAACGCACCTTGCGCTCCTTGGTATTCCGAGGAGCATGCCTGTTTGAGTGTCATTAATATATCAACCTCTTCAAGCTTATGCTTGTTGAATGTTGGATGTGGGGGGTATTTTTTGCTGGCATCTCATGAAGTCAGCTCCCCTGAAATGCATTAGCGGAACAATTTGTTGACCGTTCATTGGTGTGATAAATATCTACGCTATTGACGTCAGTCAGTTCAGCTTCTAACAGTCCATTGACTTGGACAAATTTTTCATTAATGTGACCTCAAATCAGGTAGGACTACCCGCTGAACTTAAGC	10	cellular organisms	Eukaryota	Opisthokonta	Fungi	Dikarya	Basidiomycota		Wallemiomycotina			Wallemiomycetes		Wallemiales	Wallemiaceae	Wallemia	Wallemia sebi
Tuber magnatum	18S	Peridium	AAATGCGATAAGTAATGTGAATTGCAGAATTCAGTGAATCATCGAATCTTTGAACGCACCTTGCGCTCCTTGGTATTCCGAGGAGCATGCCTGTTTGAGTGTCATTAAATTCTCAACCCATCCAGTTTTGATAGCTGGTATGTGGCTTGGATGTGGGGGTCTATGCCGGCCTTTATAATAAAAGGTCAGCTTCCCTGAAATACATTAGCGGAACGGTTTGCGATCTGTTACTGGTGTGATAATTATCTATGCCAATGACTTGTGAACGCTCTCTGTCTGTTCAGCTTCTAATAGTCCCATCATGTGGACAACCTTTATAATGAACATTTGACCTCAAATCAGGTAGGACTACCCGCTGAACTTAAGC	23	cellular organisms	Eukaryota	Opisthokonta	Fungi	Dikarya	Basidiomycota		Agaricomycotina			Agaricomycetes	Agaricomycetidae	Agaricales	Agaricaceae	Cystolepiota	Cystolepiota hetieri
Tuber magnatum	18S	Peridium	CAATGCGATAAGTAGTGTGAATTGCAGATTTCAGTGAATCATCGAATCTTTGAACGCACATTGCGCCCTTTGGTATTCCGAAGGGCATGCCTGTCTGAGCGTCAGTAAATCAATCAAACTTTGGTTTGGTATTGGGAGAAGTGGTTTTGCCTCTCTCCTTTAAGCTATTGGCGACGCTATTTCAGCTTGTAAGACGTAGTAAGTAATTTCTCGTTGAAGCAACTGGATGGCTGTCTGCCAAATGAACGATTTATTTTACAGCTTGACCTCAGATCAGGTAGGGATACCCCCTGAACTTAAGC	15	cellular organisms	Eukaryota	Opisthokonta	Fungi	Dikarya	Ascomycota	saccharomyceta	Pezizomycotina			Pezizomycetes		Pezizales	Ascobolaceae	Ascobolus	Ascobolus sp.
Tuber magnatum	18S	Peridium	AAATGCGATAAGTAATGTGAATTGCAGAATTCAGTGAATCATCGAATCTTTGAACGCATATTGCGCCCTTTGGTATTCCGAAGGGCATGCCTGTTCGAGCGTCATTACACCCCTCAAACATCATTGTTTGATGTTGGGTACTGCCGGAAGGCATACCTCAAAATCAGCGACGGTTACAATCAACCTCAGGCGTACAAACATCGCTATGGTGGAAGATGGGAGCCTGTCTCTTTAATGAAAATCTAAATGTTGACCTCGGATCAGGTAGGAATACCCGCTGAACTTAAGC	11	cellular organisms	Eukaryota	Opisthokonta	Fungi	Dikarya	Ascomycota	saccharomyceta	Pezizomycotina	leotiomyceta	Eurotiomycetes	Sclerococcomycetidae		Sclerococcales	Dactylosporaceae	Dactylospora	Dactylospora sp.
Tuber magnatum	18S	Peridium	AAACGCGATATTTCTTGTGAATTGCAGAAGTGAATCATCAGTTTTTGAACGCACATTGCACTTTGGGGTATCCCCCAAAGTATACTTGTTTGAGCGTTGTTTCTCTCTTGGAATTGCTTTGCTCTTCTAAAATTTCGAATCAAATTCGTTTGAAAAACAACACTATTCAACCTCAGATCAAGTAGGATTACCCGCTGAACTTAAGC	873	cellular organisms	Eukaryota	Opisthokonta	Fungi	Dikarya	Ascomycota	saccharomyceta	Saccharomycotina			Saccharomycetes		Saccharomycetales	Dipodascaceae	Geotrichum	Geotrichum candidum
Tuber magnatum	18S	Peridium	AAATGCGATAAGTAATGTGAATTGCAGAATTCAGTGAATCATCGAATCTTTGAACGCATATTGCGCCCTTTGGTATTCCGAAGGGCATGCCTGTTCGAGCGTCATTACACCCCTCAAACATCATTGTTTGATGTTGGGTACTGCCGGAAGGCATACCTCAAAATCAGCGACGGTTACAATCAACCTCAGGCGTACAAACATCGCTATGGTGGAAGATGGGAGCCTGTCTCTTTAATGAAAATCTAAATGTTGACCTCGGATCAGGTAGGAATACCCGCTGAACTTAAGC	74	cellular organisms	Eukaryota	Opisthokonta	Fungi	Dikarya	Ascomycota	saccharomyceta	Saccharomycotina			Saccharomycetes		Saccharomycetales	Dipodascaceae	Geotrichum	Geotrichum candidum
Tuber magnatum	18S	Peridium	AACCGCGATATTTTTTGTGACTTGCAGATGTGAATCATCAATCTTTGAACGCACATTGCGCGGTATGGCATTCCGTACCGCACGGATGGAGGAGCGTGTTCCCTCTGGGATCGCATTGCTTTCTTGAAATGGATTTTTTAAACTCTCAATTATTACGTCATTTCACCTCCTTCATCCGAGATTACCCGCTGAACTTAAGC	16	cellular organisms	Eukaryota	Opisthokonta	Fungi	Dikarya	Ascomycota	saccharomyceta	Saccharomycotina			Saccharomycetes		Saccharomycetales	Dipodascaceae	Yarrowia	Yarrowia lipolytica
Tuber magnatum	18S	Peridium	AACGTGCGAAACGTAATGTGAATTGCAGAATTCAGTGAATCATCGAATCTTTGAACGCATCTTGCGCTCCTTGGCATTCCGAGGAGCATGCCTGTTTGAGTGTCGTGCAAGTGCTCAATTTCAATCTTTTTGTTTGAAATTGGATTTGGACGTTGCTGTGGACATCTCAGCTCGCCCTAAAGACATTAGCGAATCTCTGCCTTGATCACGCACAATGTGATAACAAAAGCATTGTTAGGATCAGATAGAGTTGCTTCTAATCGTCGAAAGACAAATCTTAACTTCATGTCATTGACCTCAAATCAGGTAGGATTACCCGCTGAACTTAAGC	20	cellular organisms	Eukaryota	Opisthokonta	Fungi	Dikarya	Basidiomycota		Agaricomycotina			Agaricomycetes	Phallomycetidae	Geastrales	Geastraceae	Geastrum	Geastrum sp.
Tuber magnatum	18S	Peridium	AAATGCGATAAGTAATGTGAATTGCAGAATTCAGTGAATCATCGAATCTTTGAACGCACATTGCGCCCCTTGGTATTCCGAGGGGCATGCCTATTCGAGCGTCATTATCACCCCTCAAGCTTTGCTTGGTGTTGAGGCCTGCTGTAAGGGCAGCCTCTAAAATCAGTGGCAGTGCTGTCAGGCTCTAAGCGTAGTAATTTCATCGCTATAGACACCTGGTGGACACTCGCCAGAACCCCCCCATTTTTTAATGATTGACCTCGGATTAGGTAGGGATACCCGCTGAACTTAAGC	18	cellular organisms	Eukaryota	Opisthokonta	Fungi	Dikarya	Ascomycota	saccharomyceta	Pezizomycotina	leotiomyceta	sordariomyceta	Leotiomycetes		Helotiales	Helotiales	Tetracladium	Tetracladium sp.
Tuber magnatum	18S	Peridium	AAATGCGATAAGTAATGCGAATTGCAGAATTTCAGTGAGTCATCGAATCTTTGAACGCACATTGCGCCCTTTGGTATTCCGAAGGGCATGCCTGTTCGAGCGTCATTATCAACCCTCAAGCCCCTCGGAGTTTGGTTTTGGATGGCCAGGTCGCTTAAAACGACCCATCCTAAAGACAATGACGGCGGTGGATGTGATTGCACCCGGTACACTGAGCTTCTTAATTGAGCATGTATCAGGACGCAGCCGAACCTCCGGTCTTCTCCCTTCGGGGAACCTTTTTTTACAAGATTGACCTCGAATCAGGTAGGAATACCCGCTGAACTTAAGC	130	cellular organisms	Eukaryota	Opisthokonta	Fungi	Dikarya	Ascomycota	saccharomyceta	Pezizomycotina	leotiomyceta		Eurotiomycetes	Chaetothyriomycetidae	Chaetothyriales	Herpotrichiellaceae	Capronia	Capronia coronata
Tuber magnatum	18S	Peridium	AAATGCGATAAGTAATGCGAATTGCAGAATTCCAGTGAGTCATCGAATCTTTGAACGCATATTGCGCCCTTTGGTATTCCGAAGGGCATGCCTGTTCGAGCGTCATTATCACCCCTCAAACCCCCTGGGTTTGGTTTTGGAGGCTTCGGTCGGTCACACGACCCCTCTTAAAGACAATGACGGCGGCCTCGCAGGACCCCCGGTACAGTGAGCTTTCTTTATGGAGCATGTACCGCCCGGGGCCCGAGGCCGTCGGTCGTCTCCCTTCACCGGGAAACTTCTTTTAAGGTTGACCTCGGATCAGGTAGGAATACCCGCTGAACTTAAGC	108	cellular organisms	Eukaryota	Opisthokonta	Fungi	Dikarya	Ascomycota	saccharomyceta	Pezizomycotina	leotiomyceta		Eurotiomycetes	Chaetothyriomycetidae	Chaetothyriales	Herpotrichiellaceae	Exophiala	Exophiala angulospora
Tuber magnatum	18S	Peridium	AAATGCGATACGTAATATGAATTGCAGATTTTGTGAATCATCGAATCTTTGAACGCACATTGCGCCCGTGGGTATTCCCGCGGGCATGCGTGTGTGAGCGGTTATCTCCCTCGCAGGTAATGGACATACGGCGTCAGCTGTTCCTCCAAAAAGTGATTGGTGTAGTATTACAGTTTACTCACAACCATACTTTTTCCCTCACACACGTAAGACTACCCGCTGAACTTAAGC	206	cellular organisms	Eukaryota	Opisthokonta	Fungi	Dikarya	Ascomycota	saccharomyceta	Saccharomycotina			Saccharomycetes		Saccharomycetales	Saccharomycetales incertae sedis	Diutina	Diutina catenulata
Tuber magnatum	18S	Peridium	AAATGCGATAAGTAATGTGAATTGCAGAATTCAGTGAATCATCGAATCTTTGAACGCACCTTGCGCTCCTTGGTATTCCGAGGAGCATGCCTGTTTGAGTGTCATTAAATTCTCAACCTTTGTTAACTTTTTGGTTAGCAAATGGCTTGGATGTGGGGGTATGCAGGTTTCTCTATTGAAATTAGCTCCCCTGAAATACATTAGCTGGTTGCCTTGTGTAAACTTGTCTATTGGTGTGATAATTATCTACGCCGTGGACTATTTGCCGTTTTTAGCACTGCTTATAATCGACTGTTCATTCGGACAATATATGACAATTTGACCTCAAATCAGGTAGGACTACCCGCTGAACTTAAGC	7	cellular organisms	Eukaryota	Opisthokonta	Fungi	Dikarya	Basidiomycota	Agaricomycotina	Agaricomycetes	Agaricomycetidae				Agaricales	Strophariaceae	Hypholoma	Hypholoma capnoides
Tuber magnatum	18S	Peridium	AAATGCGATAGGTAATGTGAATTGCAGAACTCAGTGAATCATCGAATCTTTGAACGCACATTGCGCCCTCTGGCATTCCTCAGGGCATGCCTGTTTGAGCGTCACTGAAAACCCACTCACGGAATCACGTGGTGCTGATGGAGGTGGCTTGGTACCGCAGCGGCGGTGGCCGGGTCCACCCTGTCGAATTTCATTGGGAGGATGACGGACCCCCGGCTGCTGACTTTGTAGACATCGCCTTGAAATGCGTGCTAGTTGCCAGTCAGGCCCGGTCCTGCACGCTTGAGGATCCCTGCCATGGGATCCACTGTCCAACTGGGTTGACCTCAGATCAGGTAGGGATACCCGCTGAACTTAAGC	15870	cellular organisms	Eukaryota	Opisthokonta	Fungi	Dikarya	Ascomycota	saccharomyceta	Pezizomycotina			Pezizomycetes		Pezizales	Tuberaceae	Tuber	Tuber magnatum
Tuber magnatum	18S	Peridium	AAATGCGATAGGTAATGTGAATTGCAGAACTCAGTGAATCATCGAATCTTTGAACGCACATTGCGCCCTCTGGCATTCCTCAGGGCATGCCTGTTTGAGCGTCACTGAAAACCCACTCACGGAATCACGTGGTGCTGATGGAGGTGGCTTGGTACCGCAGCGGCGGTGGCCGGGTCCACCCTGTCGAATTTCATTGGGAGGATGACGGACCCCCGGCTGCTGACTTTGTAGACATCGCCTTGAAATGCGTGCTAGTTGCCAGCCACGCCTGGTCCTGCCCGATTGCGGATCCCCGTCATGGGATCCACTGTCAAACTGGGTTGACCTCGGATCAGGTAGGGATACCTGCTAAACTTAAGC	89	cellular organisms	Eukaryota	Opisthokonta	Fungi	Dikarya	Ascomycota	saccharomyceta	Pezizomycotina			Pezizomycetes		Pezizales	Tuberaceae	Tuber	Tuber magnatum
