# Supplementary material for: Microbial communities inhabiting the surface and gleba of white (Tuber magnatum) and black (Tuber macrosporum) truffles from Russia
Source: PeerJ. 2025 Sep 19;13:e20037. doi: 10.7717/peerj.20037 (PMC12452945; doi:10.7717/peerj.20037)
Supplement: Supplemental Information 7 [file peerj-13-20037-s007.xlsx]

## Sheet: MatrixOutput
	LPB313_Tuber_magnatum_Russia	LPB323_Tuber_magnatum_Russia	LPB311_Tuber_magnatum_Russia	LPB321_Tuber_magnatum_Russia	MW759842.1_Tuber_magnatum_Italy	MW759824.1_Tuber_magnatum_Italy	MW759823.1_Tuber_magnatum_Italy	MG992595.1_Tuber_magnatum_Italy	AJ586270.1_Tuber_magnatum_Italy	JX087959.1_Tuber_magnatum_Italy	AJ586303.1_Tuber_magnatum_Italy	MK557927.1_Tuber_magnatum_Switzerland	MK574864.1_Tuber_magnatum_Switzerland	MG992596.1_Tuber_magnatum_Chile	MG992594.1_Tuber_magnatum_Chile	MG992595.1_Tuber_magnatum_Chile	MN104018.1_Tuber_magnatum_France	JX087960.1_Tuber_magnatum_Southern_Italy	JX087958.1_Tuber_magnatum_Southern_Italy	JX087957.1_Tuber_magnatum_Southern_Italy	JX087954.1_Tuber_magnatum_Southern_Italy	JX087953.1_Tuber_magnatum_Southern_Italy	JX087950.1_Tuber_magnatum_Southern_Italy	AJ586301.1_Tuber_magnatum_Italy	AJ586296.1_Tuber_magnatum_Italy	AJ586252.1_Tuber_magnatum_roatia	AJ586253.1_Tuber_magnatum_roatia	AJ586254.1_Tuber_magnatum_Croatia	FM205633.1_Tuber_magnatum_Slovenia	FM205629.1_Tuber_magnatum_Slovenia	FM205628.1_Tuber_magnatum_Slovenia	FM205627.1_Tuber_magnatum_Slovenia	FM205626.1_Tuber_magnatum_Slovenia	FM205625.1_Tuber_magnatum_Slovenia	FM205624.1_Tuber_magnatum_Slovenia	FM205520.1_Tuber_magnatum_Serbia	FM205521.1_Tuber_magnatum_Serbia	FM205518.1_Tuber_magnatum_Serbia	FM205516.1_Tuber_magnatum_Serbia	FM205519.1_Tuber_magnatum_Serbia	AJ888042.1_Tuber_magnatum_Sweden	AJ586300.1_Tuber_magnatum_Italy	AJ586305.1_Tuber_magnatum_Italy	AJ586306.1_Tuber_magnatum_Italy	AJ586294.1_Tuber_magnatum_Italy	AJ586265.1_Tuber_magnatum_Italy	AJ586292.1_Tuber_magnatum_Italy	AJ586291.1_Tuber_magnatum_Italy	AJ586290.1_Tuber_magnatum_Italy
LPB313_Tuber_magnatum_Russia
LPB323_Tuber_magnatum_Russia	0	0
LPB311_Tuber_magnatum_Russia	0	0	0	0
LPB321_Tuber_magnatum_Russia	0	0	0	0	0	0
MW759842.1_Tuber_magnatum_Italy	98	7.43671	98	7.43671	66	7.02449	98	7.43671
MW759824.1_Tuber_magnatum_Italy	98	7.43671	98	7.43671	66	7.02449	98	7.43671	0	0
MW759823.1_Tuber_magnatum_Italy	98	7.43671	98	7.43671	66	7.02449	98	7.43671	0	0	0	0
MG992595.1_Tuber_magnatum_Italy	0	0	0	0	0	0	0	0	98	7.43671	98	7.43671	98	7.43671
AJ586270.1_Tuber_magnatum_Italy	0	0	0	0	0	0	0	0	98	7.43671	98	7.43671	98	7.43671	0	0
JX087959.1_Tuber_magnatum_Italy	3	1.5333	3	1.5333	1	0.887625	3	1.5333	95	7.43464	95	7.43464	95	7.43464	3	1.5333	3	1.5333
AJ586303.1_Tuber_magnatum_Italy	0	0	0	0	0	0	0	0	98	7.43671	98	7.43671	98	7.43671	0	0	0	0	3	1.5333
MK557927.1_Tuber_magnatum_Switzerland	0	0	0	0	0	0	0	0	89	7.18835	89	7.18835	89	7.18835	0	0	0	0	1	0.887625	0	0
MK574864.1_Tuber_magnatum_Switzerland	0	0	0	0	0	0	0	0	98	7.43671	98	7.43671	98	7.43671	0	0	0	0	3	1.5333	0	0	0	0
MG992596.1_Tuber_magnatum_Chile	0	0	0	0	0	0	0	0	98	7.43671	98	7.43671	98	7.43671	0	0	0	0	3	1.5333	0	0	0	0	0	0
MG992594.1_Tuber_magnatum_Chile	0	0	0	0	0	0	0	0	98	7.43671	98	7.43671	98	7.43671	0	0	0	0	3	1.5333	0	0	0	0	0	0	0	0
MG992595.1_Tuber_magnatum_Chile	0	0	0	0	0	0	0	0	98	7.43671	98	7.43671	98	7.43671	0	0	0	0	3	1.5333	0	0	0	0	0	0	0	0	0	0
MN104018.1_Tuber_magnatum_France	0	0	0	0	0	0	0	0	98	7.43671	98	7.43671	98	7.43671	0	0	0	0	3	1.5333	0	0	0	0	0	0	0	0	0	0	0	0
JX087960.1_Tuber_magnatum_Southern_Italy	1	0.964575	1	0.964575	1	0.964575	1	0.964575	96	7.27172	96	7.27172	96	7.27172	1	0.964575	1	0.964575	4	1.68343	1	0.964575	1	0.964575	1	0.964575	1	0.964575	1	0.964575	1	0.964575	1	0.964575
JX087958.1_Tuber_magnatum_Southern_Italy	0	0	0	0	0	0	0	0	98	7.43671	98	7.43671	98	7.43671	0	0	0	0	3	1.5333	0	0	0	0	0	0	0	0	0	0	0	0	0	0	1	0.964575
JX087957.1_Tuber_magnatum_Southern_Italy	0	0	0	0	0	0	0	0	98	7.43671	98	7.43671	98	7.43671	0	0	0	0	3	1.5333	0	0	0	0	0	0	0	0	0	0	0	0	0	0	1	0.964575	0	0
JX087954.1_Tuber_magnatum_Southern_Italy	0	0	0	0	0	0	0	0	98	7.43671	98	7.43671	98	7.43671	0	0	0	0	3	1.5333	0	0	0	0	0	0	0	0	0	0	0	0	0	0	1	0.964575	0	0	0	0
JX087953.1_Tuber_magnatum_Southern_Italy	0	0	0	0	0	0	0	0	98	7.43671	98	7.43671	98	7.43671	0	0	0	0	3	1.5333	0	0	0	0	0	0	0	0	0	0	0	0	0	0	1	0.964575	0	0	0	0	0	0
JX087950.1_Tuber_magnatum_Southern_Italy	0	0	0	0	0	0	0	0	98	7.43671	98	7.43671	98	7.43671	0	0	0	0	3	1.5333	0	0	0	0	0	0	0	0	0	0	0	0	0	0	1	0.964575	0	0	0	0	0	0	0	0
AJ586301.1_Tuber_magnatum_Italy	0	0	0	0	0	0	0	0	98	7.43671	98	7.43671	98	7.43671	0	0	0	0	3	1.5333	0	0	0	0	0	0	0	0	0	0	0	0	0	0	1	0.964575	0	0	0	0	0	0	0	0	0	0
AJ586296.1_Tuber_magnatum_Italy	0	0	0	0	0	0	0	0	98	7.43671	98	7.43671	98	7.43671	0	0	0	0	3	1.5333	0	0	0	0	0	0	0	0	0	0	0	0	0	0	1	0.964575	0	0	0	0	0	0	0	0	0	0	0	0
AJ586252.1_Tuber_magnatum_roatia	1	0.904031	1	0.904031	0	0	1	0.904031	99	7.41467	99	7.41467	99	7.41467	1	0.904031	1	0.904031	4	1.69955	1	0.904031	0	0	1	0.904031	1	0.904031	1	0.904031	1	0.904031	1	0.904031	2	1.30268	1	0.904031	1	0.904031	1	0.904031	1	0.904031	1	0.904031	1	0.904031	1
AJ586253.1_Tuber_magnatum_roatia	1	0.904031	1	0.904031	0	0	1	0.904031	99	7.41467	99	7.41467	99	7.41467	1	0.904031	1	0.904031	4	1.69955	1	0.904031	0	0	1	0.904031	1	0.904031	1	0.904031	1	0.904031	1	0.904031	2	1.30268	1	0.904031	1	0.904031	1	0.904031	1	0.904031	1	0.904031	1	0.904031	1
AJ586254.1_Tuber_magnatum_Croatia	0	0	0	0	0	0	0	0	98	7.43671	98	7.43671	98	7.43671	0	0	0	0	3	1.5333	0	0	0	0	0	0	0	0	0	0	0	0	0	0	1	0.964575	0	0	0	0	0	0	0	0	0	0	0	0	0
FM205633.1_Tuber_magnatum_Slovenia	0	0	0	0	0	0	0	0	98	7.43671	98	7.43671	98	7.43671	0	0	0	0	3	1.5333	0	0	0	0	0	0	0	0	0	0	0	0	0	0	1	0.964575	0	0	0	0	0	0	0	0	0	0	0	0	0
FM205629.1_Tuber_magnatum_Slovenia	0	0	0	0	0	0	0	0	98	7.43671	98	7.43671	98	7.43671	0	0	0	0	3	1.5333	0	0	0	0	0	0	0	0	0	0	0	0	0	0	1	0.964575	0	0	0	0	0	0	0	0	0	0	0	0	0
FM205628.1_Tuber_magnatum_Slovenia	0	0	0	0	0	0	0	0	98	7.43671	98	7.43671	98	7.43671	0	0	0	0	3	1.5333	0	0	0	0	0	0	0	0	0	0	0	0	0	0	1	0.964575	0	0	0	0	0	0	0	0	0	0	0	0	0
FM205627.1_Tuber_magnatum_Slovenia	0	0	0	0	0	0	0	0	98	7.43671	98	7.43671	98	7.43671	0	0	0	0	3	1.5333	0	0	0	0	0	0	0	0	0	0	0	0	0	0	1	0.964575	0	0	0	0	0	0	0	0	0	0	0	0	0
FM205626.1_Tuber_magnatum_Slovenia	0	0	0	0	0	0	0	0	98	7.43671	98	7.43671	98	7.43671	0	0	0	0	3	1.5333	0	0	0	0	0	0	0	0	0	0	0	0	0	0	1	0.964575	0	0	0	0	0	0	0	0	0	0	0	0	0
FM205625.1_Tuber_magnatum_Slovenia	0	0	0	0	0	0	0	0	98	7.43671	98	7.43671	98	7.43671	0	0	0	0	3	1.5333	0	0	0	0	0	0	0	0	0	0	0	0	0	0	1	0.964575	0	0	0	0	0	0	0	0	0	0	0	0	0
FM205624.1_Tuber_magnatum_Slovenia	0	0	0	0	0	0	0	0	98	7.43671	98	7.43671	98	7.43671	0	0	0	0	3	1.5333	0	0	0	0	0	0	0	0	0	0	0	0	0	0	1	0.964575	0	0	0	0	0	0	0	0	0	0	0	0	0
FM205520.1_Tuber_magnatum_Serbia	0	0	0	0	0	0	0	0	98	7.43671	98	7.43671	98	7.43671	0	0	0	0	3	1.5333	0	0	0	0	0	0	0	0	0	0	0	0	0	0	1	0.964575	0	0	0	0	0	0	0	0	0	0	0	0	0
FM205521.1_Tuber_magnatum_Serbia	0	0	0	0	0	0	0	0	98	7.43671	98	7.43671	98	7.43671	0	0	0	0	3	1.5333	0	0	0	0	0	0	0	0	0	0	0	0	0	0	1	0.964575	0	0	0	0	0	0	0	0	0	0	0	0	0
FM205518.1_Tuber_magnatum_Serbia	0	0	0	0	0	0	0	0	98	7.43671	98	7.43671	98	7.43671	0	0	0	0	3	1.5333	0	0	0	0	0	0	0	0	0	0	0	0	0	0	1	0.964575	0	0	0	0	0	0	0	0	0	0	0	0	0
FM205516.1_Tuber_magnatum_Serbia	0	0	0	0	0	0	0	0	98	7.43671	98	7.43671	98	7.43671	0	0	0	0	3	1.5333	0	0	0	0	0	0	0	0	0	0	0	0	0	0	1	0.964575	0	0	0	0	0	0	0	0	0	0	0	0	0
FM205519.1_Tuber_magnatum_Serbia	0	0	0	0	0	0	0	0	98	7.43671	98	7.43671	98	7.43671	0	0	0	0	3	1.5333	0	0	0	0	0	0	0	0	0	0	0	0	0	0	1	0.964575	0	0	0	0	0	0	0	0	0	0	0	0	0
AJ888042.1_Tuber_magnatum_Sweden	1	0.904031	1	0.904031	0	0	1	0.904031	99	7.41467	99	7.41467	99	7.41467	1	0.904031	1	0.904031	4	1.69955	1	0.904031	0	0	1	0.904031	1	0.904031	1	0.904031	1	0.904031	1	0.904031	2	1.30268	1	0.904031	1	0.904031	1	0.904031	1	0.904031	1	0.904031	1	0.904031	1
AJ586300.1_Tuber_magnatum_Italy	0	0	0	0	0	0	0	0	98	7.43671	98	7.43671	98	7.43671	0	0	0	0	3	1.5333	0	0	0	0	0	0	0	0	0	0	0	0	0	0	1	0.964575	0	0	0	0	0	0	0	0	0	0	0	0	0
AJ586305.1_Tuber_magnatum_Italy	0	0	0	0	0	0	0	0	98	7.43671	98	7.43671	98	7.43671	0	0	0	0	3	1.5333	0	0	0	0	0	0	0	0	0	0	0	0	0	0	1	0.964575	0	0	0	0	0	0	0	0	0	0	0	0	0
AJ586306.1_Tuber_magnatum_Italy	0	0	0	0	0	0	0	0	98	7.43671	98	7.43671	98	7.43671	0	0	0	0	3	1.5333	0	0	0	0	0	0	0	0	0	0	0	0	0	0	1	0.964575	0	0	0	0	0	0	0	0	0	0	0	0	0
AJ586294.1_Tuber_magnatum_Italy	0	0	0	0	0	0	0	0	98	7.43671	98	7.43671	98	7.43671	0	0	0	0	3	1.5333	0	0	0	0	0	0	0	0	0	0	0	0	0	0	1	0.964575	0	0	0	0	0	0	0	0	0	0	0	0	0
AJ586265.1_Tuber_magnatum_Italy	0	0	0	0	0	0	0	0	98	7.43671	98	7.43671	98	7.43671	0	0	0	0	3	1.5333	0	0	0	0	0	0	0	0	0	0	0	0	0	0	1	0.964575	0	0	0	0	0	0	0	0	0	0	0	0	0
AJ586292.1_Tuber_magnatum_Italy	0	0	0	0	0	0	0	0	98	7.43671	98	7.43671	98	7.43671	0	0	0	0	3	1.5333	0	0	0	0	0	0	0	0	0	0	0	0	0	0	1	0.964575	0	0	0	0	0	0	0	0	0	0	0	0	0
AJ586291.1_Tuber_magnatum_Italy	0	0	0	0	0	0	0	0	98	7.43671	98	7.43671	98	7.43671	0	0	0	0	3	1.5333	0	0	0	0	0	0	0	0	0	0	0	0	0	0	1	0.964575	0	0	0	0	0	0	0	0	0	0	0	0	0
AJ586290.1_Tuber_magnatum_Italy	0	0	0	0	0	0	0	0	98	7.43671	98	7.43671	98	7.43671	0	0	0	0	3	1.5333	0	0	0	0	0	0	0	0	0	0	0	0	0	0	1	0.964575	0	0	0	0	0	0	0	0	0	0	0	0	0
AJ586289.1_Tuber_magnatum_Italy	0	0	0	0	0	0	0	0	98	7.43671	98	7.43671	98	7.43671	0	0	0	0	3	1.5333	0	0	0	0	0	0	0	0	0	0	0	0	0	0	1	0.964575	0	0	0	0	0	0	0	0	0	0	0	0	0
AJ586288.1_Tuber_magnatum_Italy	0	0	0	0	0	0	0	0	98	7.43671	98	7.43671	98	7.43671	0	0	0	0	3	1.5333	0	0	0	0	0	0	0	0	0	0	0	0	0	0	1	0.964575	0	0	0	0	0	0	0	0	0	0	0	0	0
AJ586284.1_Tuber_magnatum_Italy	0	0	0	0	0	0	0	0	98	7.43671	98	7.43671	98	7.43671	0	0	0	0	3	1.5333	0	0	0	0	0	0	0	0	0	0	0	0	0	0	1	0.964575	0	0	0	0	0	0	0	0	0	0	0	0	0
AJ586282.1_Tuber_magnatum_Italy	0	0	0	0	0	0	0	0	98	7.43671	98	7.43671	98	7.43671	0	0	0	0	3	1.5333	0	0	0	0	0	0	0	0	0	0	0	0	0	0	1	0.964575	0	0	0	0	0	0	0	0	0	0	0	0	0
AJ586281.1_Tuber_magnatum_Italy	0	0	0	0	0	0	0	0	98	7.43671	98	7.43671	98	7.43671	0	0	0	0	3	1.5333	0	0	0	0	0	0	0	0	0	0	0	0	0	0	1	0.964575	0	0	0	0	0	0	0	0	0	0	0	0	0
AJ586276.1_Tuber_magnatum_Italy	0	0	0	0	0	0	0	0	98	7.43671	98	7.43671	98	7.43671	0	0	0	0	3	1.5333	0	0	0	0	0	0	0	0	0	0	0	0	0	0	1	0.964575	0	0	0	0	0	0	0	0	0	0	0	0	0
AJ586275.1_Tuber_magnatum_Italy	0	0	0	0	0	0	0	0	98	7.43671	98	7.43671	98	7.43671	0	0	0	0	3	1.5333	0	0	0	0	0	0	0	0	0	0	0	0	0	0	1	0.964575	0	0	0	0	0	0	0	0	0	0	0	0	0
AJ586273.1_Tuber_magnatum_Italy	0	0	0	0	0	0	0	0	98	7.43671	98	7.43671	98	7.43671	0	0	0	0	3	1.5333	0	0	0	0	0	0	0	0	0	0	0	0	0	0	1	0.964575	0	0	0	0	0	0	0	0	0	0	0	0	0
AJ586272.1_Tuber_magnatum_Italy	0	0	0	0	0	0	0	0	98	7.43671	98	7.43671	98	7.43671	0	0	0	0	3	1.5333	0	0	0	0	0	0	0	0	0	0	0	0	0	0	1	0.964575	0	0	0	0	0	0	0	0	0	0	0	0	0
AJ586271.1_Tuber_magnatum_Italy	1	1.02863	1	1.02863	1	1.02863	1	1.02863	98	7.43671	98	7.43671	98	7.43671	1	1.02863	1	1.02863	4	1.8532	1	1.02863	1	1.02863	1	1.02863	1	1.02863	1	1.02863	1	1.02863	1	1.02863	2	1.56076	1	1.02863	1	1.02863	1	1.02863	1	1.02863	1	1.02863	1	1.02863	1
AJ586269.1_Tuber_magnatum_Italy	0	0	0	0	0	0	0	0	98	7.43671	98	7.43671	98	7.43671	0	0	0	0	3	1.5333	0	0	0	0	0	0	0	0	0	0	0	0	0	0	1	0.964575	0	0	0	0	0	0	0	0	0	0	0	0	0
AJ586267.1_Tuber_magnatum_Italy	0	0	0	0	0	0	0	0	98	7.43671	98	7.43671	98	7.43671	0	0	0	0	3	1.5333	0	0	0	0	0	0	0	0	0	0	0	0	0	0	1	0.964575	0	0	0	0	0	0	0	0	0	0	0	0	0
AJ586266.1_Tuber_magnatum_Italy	0	0	0	0	0	0	0	0	98	7.43671	98	7.43671	98	7.43671	0	0	0	0	3	1.5333	0	0	0	0	0	0	0	0	0	0	0	0	0	0	1	0.964575	0	0	0	0	0	0	0	0	0	0	0	0	0
AJ586262.1_Tuber_magnatum_Italy	0	0	0	0	0	0	0	0	98	7.43671	98	7.43671	98	7.43671	0	0	0	0	3	1.5333	0	0	0	0	0	0	0	0	0	0	0	0	0	0	1	0.964575	0	0	0	0	0	0	0	0	0	0	0	0	0
AJ586259.1_Tuber_magnatum_Italy	0	0	0	0	0	0	0	0	98	7.43671	98	7.43671	98	7.43671	0	0	0	0	3	1.5333	0	0	0	0	0	0	0	0	0	0	0	0	0	0	1	0.964575	0	0	0	0	0	0	0	0	0	0	0	0	0
AJ586258.1_Tuber_magnatum_Italy	0	0	0	0	0	0	0	0	98	7.43671	98	7.43671	98	7.43671	0	0	0	0	3	1.5333	0	0	0	0	0	0	0	0	0	0	0	0	0	0	1	0.964575	0	0	0	0	0	0	0	0	0	0	0	0	0
AJ586255.1_Tuber_magnatum_Croatia	0	0	0	0	0	0	0	0	98	7.43671	98	7.43671	98	7.43671	0	0	0	0	3	1.5333	0	0	0	0	0	0	0	0	0	0	0	0	0	0	1	0.964575	0	0	0	0	0	0	0	0	0	0	0	0	0
AJ586253.1_Tuber_magnatum_Croatia	1	0.904031	1	0.904031	0	0	1	0.904031	99	7.41467	99	7.41467	99	7.41467	1	0.904031	1	0.904031	4	1.69955	1	0.904031	0	0	1	0.904031	1	0.904031	1	0.904031	1	0.904031	1	0.904031	2	1.30268	1	0.904031	1	0.904031	1	0.904031	1	0.904031	1	0.904031	1	0.904031	1
AJ586251.1_Tuber_magnatum_Croatia	1	0.904031	1	0.904031	0	0	1	0.904031	99	7.41467	99	7.41467	99	7.41467	1	0.904031	1	0.904031	4	1.69955	1	0.904031	0	0	1	0.904031	1	0.904031	1	0.904031	1	0.904031	1	0.904031	2	1.30268	1	0.904031	1	0.904031	1	0.904031	1	0.904031	1	0.904031	1	0.904031	1
PP239641.1_Tuber_magnatum_Turkey	0	0	0	0	0	0	0	0	98	7.43671	98	7.43671	98	7.43671	0	0	0	0	3	1.5333	0	0	0	0	0	0	0	0	0	0	0	0	0	0	1	0.964575	0	0	0	0	0	0	0	0	0	0	0	0	0
MK139939.1_Penicillium_sp.	75	7.16825	75	7.16825	36	5.45389	75	7.16825	99	7.92133	99	7.92133	99	7.92133	75	7.16825	75	7.16825	75	7.4416	75	7.16825	64	6.89531	75	7.16825	75	7.16825	75	7.16825	75	7.16825	75	7.16825	76	7.28527	75	7.16825	75	7.16825	75	7.16825	75	7.16825	75	7.16825	75	7.16825	75
[truncated: 89 more columns]

## Sheet: Caption
Table. Estimates of Evolutionary Divergence between Sequences
The number of base differences per sequence from between sequences are shown. Standard error estimate(s) are shown in every other column. This analysis involved 70 nucleotide sequences. Codon positions included were 1st+2nd+3rd+Noncoding. All ambiguous positions were removed for each sequence pair (pairwise deletion option). There were a total of 277 positions in the final dataset. Evolutionary a…
1. Kumar S., Stecher G., Li M., Knyaz C., and Tamura K. (2018). MEGA X: Molecular Evolutionary Genetics Analysis across computing platforms. Molecular Biology and Evolution 35:1547-1549.
Disclaimer: Although utmost care has been taken to ensure the correctness of the caption, the caption text is provided "as is" without any warranty of any kind. Authors advise the user to carefully check the caption prior to its use for any purpose and report any errors or problems to the authors immediately (www.megasoftware.net). In no event shall the authors and their employers be liable for a…
