# Supplementary material for: Microbial communities inhabiting the surface and gleba of white (Tuber magnatum) and black (Tuber macrosporum) truffles from Russia
Source: PeerJ. 2025 Sep 19;13:e20037. doi: 10.7717/peerj.20037 (PMC12452945; doi:10.7717/peerj.20037)
Supplement: Supplemental Information 8 [file peerj-13-20037-s008.xlsx]

## Sheet: MatrixOutput
	LPB262_Tuber_macrosporum_Russia	LPB272_Tuber_macrosporum_Russia	LPB263_Tuber_macrosporum_Russia	AF106885.1_Tuber_macrosporum_Italy	KP738395.1_Tuber_macrosporum_Italy	KP738396.1_Tuber_macrosporum_Italy	KP738391.1_Tuber_macrosporum_Italy	KP738382.1_Tuber_macrosporum_Italy	KP738381.1_Tuber_macrosporum_Italy	KP738380.1_Tuber_macrosporum_Italy	KP738383.1_Tuber_macrosporum_Italy	KP738385.1_Tuber_macrosporum_Italy	KP738386.1_Tuber_macrosporum_Italy	KP738387.1_Tuber_macrosporum_Italy	KP738389.1_Tuber_macrosporum_Italy	KP738394.1_Tuber_macrosporum_Italy	KP738392.1_Tuber_macrosporum_Italy	KP738376.1_Tuber_macrosporum_Hungary	KP738369.1_Tuber_macrosporum_Hungary	KP738357.1_Tuber_macrosporum_Serbia	KP738358.1_Tuber_macrosporum_Serbia	KP738363.1_Tuber_macrosporum_France	KP738362.1_Tuber_macrosporum_France	KP738361.1_Tuber_macrosporum_France	KP738360.1_Tuber_macrosporum_Slovenia	MW884554.1_Tuber_macrosporum_Iran	MW432548.1_Tuber_macrosporum_Turkey	MW423732.1_Tuber_macrosporum_Turkey	MW362408.1_Tuber_macrosporum_Turkey	JF926121.1_Tuber_macrosporum_Germany	KP738378.1_Tuber_macrosporum_Italy	KP738377.1_Tuber_macrosporum_Hungary	KP738374.1_Tuber_macrosporum_Hungary	KP738370.1_Tuber_macrosporum_Italy	KP738368.1_Tuber_macrosporum_Hungary	KP738367.1_Tuber_macrosporum_Hungary	KP738366.1_Tuber_macrosporum_Hungary	KP738356.1_Tuber_macrosporum_Italy	KP738355.1_Tuber_macrosporum_Italy	KP738354.1_Tuber_macrosporum_Italy	KP738353.1_Tuber_macrosporum_Italy	KP738352.1_Tuber_macrosporum_Italy	KP738351.1_Tuber_macrosporum_Italy	KP738350.1_Tuber_macrosporum_Italy	KP738349.1_Tuber_macrosporum_Italy	KP738348.1_Tuber_macrosporum_Italy	PP948901.1_Tuber_macrosporum_Spain	KP738345.1_Tuber_macrosporum_France	MW884553.1_Tuber_macrosporum_Iran
LPB262_Tuber_macrosporum_Russia
LPB272_Tuber_macrosporum_Russia	0	0
LPB263_Tuber_macrosporum_Russia	0	0	0	0
AF106885.1_Tuber_macrosporum_Italy	2	1.25931	2	1.25931	2	1.25931
KP738395.1_Tuber_macrosporum_Italy	23	4.44818	23	4.44818	23	4.44818	23	4.69726
KP738396.1_Tuber_macrosporum_Italy	2	1.25931	2	1.25931	2	1.25931	0	0	23	4.69726
KP738391.1_Tuber_macrosporum_Italy	23	4.44908	23	4.44908	23	4.44908	23	4.62619	16	3.6117	23	4.62619
KP738382.1_Tuber_macrosporum_Italy	6	2.36513	6	2.36513	6	2.36513	6	2.33764	24	4.98786	6	2.33764	23	4.63164
KP738381.1_Tuber_macrosporum_Italy	5	1.97346	5	1.97346	5	1.97346	5	2.20018	18	3.92794	5	2.20018	18	3.71271	7	2.85139
KP738380.1_Tuber_macrosporum_Italy	6	2.18856	6	2.18856	6	2.18856	6	2.43001	19	3.90466	6	2.43001	17	3.81506	8	2.98081	1	0.904031
KP738383.1_Tuber_macrosporum_Italy	5	2.33281	5	2.33281	5	2.33281	5	2.21938	24	4.98203	5	2.21938	24	4.86841	3	1.80848	6	2.59953	7	2.68048
KP738385.1_Tuber_macrosporum_Italy	8	2.63763	8	2.63763	8	2.63763	8	2.82934	17	3.74705	8	2.82934	19	3.74806	10	3.3665	3	1.72945	4	1.85864	9	3.06448
KP738386.1_Tuber_macrosporum_Italy	5	1.97346	5	1.97346	5	1.97346	5	2.20018	18	3.92794	5	2.20018	18	3.71271	7	2.85139	0	0	1	0.904031	6	2.59953	3	1.72945
KP738387.1_Tuber_macrosporum_Italy	7	2.37178	7	2.37178	7	2.37178	7	2.5706	19	3.90466	7	2.5706	17	3.81506	9	3.16987	2	1.19236	1	0.913203	8	2.77206	4	1.85864	2	1.19236
KP738389.1_Tuber_macrosporum_Italy	5	1.97346	5	1.97346	5	1.97346	5	2.20018	18	3.92794	5	2.20018	18	3.71271	7	2.85139	0	0	1	0.904031	6	2.59953	3	1.72945	0	0	2	1.19236
KP738394.1_Tuber_macrosporum_Italy	3	1.54776	3	1.54776	3	1.54776	1	0.913203	23	4.69726	1	0.913203	22	4.5249	7	2.69641	6	2.40278	7	2.5706	6	2.46339	8	2.82934	6	2.40278	7	2.5706	6	2.40278
KP738392.1_Tuber_macrosporum_Italy	6	2.22702	6	2.22702	6	2.22702	6	2.40278	18	3.92794	6	2.40278	17	3.59944	8	3.08589	1	0.913203	2	1.19236	7	2.73614	3	1.72945	1	0.913203	2	1.19236	1	0.913203	5	2.20018
KP738376.1_Tuber_macrosporum_Hungary	4	1.94011	4	1.94011	4	1.94011	4	1.85799	22	4.49017	4	1.85799	21	4.23282	4	2.34884	5	2.00262	6	2.15038	3	1.94355	7	2.49887	5	2.00262	6	2.15038	5	2.00262	3	1.5891	4	1.87013
KP738369.1_Tuber_macrosporum_Hungary	0	0	0	0	0	0	2	1.25931	23	4.44818	2	1.25931	23	4.44908	6	2.36513	5	1.97346	6	2.18856	5	2.33281	8	2.63763	5	1.97346	7	2.37178	5	1.97346	3	1.54776	6	2.22702	4	1.94011
KP738357.1_Tuber_macrosporum_Serbia	3	1.64458	3	1.64458	3	1.64458	3	1.5891	22	4.49017	3	1.5891	22	4.29235	3	1.95037	4	1.87013	5	2.08339	2	1.65157	7	2.49887	4	1.87013	6	2.15038	4	1.87013	4	1.85799	5	2.00262	1	0.913203	3	1.64458
KP738358.1_Tuber_macrosporum_Serbia	3	1.64458	3	1.64458	3	1.64458	3	1.5891	22	4.49017	3	1.5891	22	4.29235	3	1.95037	4	1.87013	5	2.08339	2	1.65157	7	2.49887	4	1.87013	6	2.15038	4	1.87013	4	1.85799	5	2.00262	1	0.913203	3	1.64458	0	0
KP738363.1_Tuber_macrosporum_France	7	2.57562	7	2.57562	7	2.57562	7	2.50517	22	4.89043	7	2.50517	22	4.72486	5	2.39494	8	2.76725	9	2.79249	4	1.87732	10	3.08983	8	2.76725	8	2.71427	8	2.76725	7	2.50517	8	2.76725	4	2.03631	7	2.57562	4	2.03631	4	2.03631
KP738362.1_Tuber_macrosporum_France	3	1.72035	3	1.72035	3	1.72035	3	1.64151	21	4.30573	3	1.64151	22	4.25828	5	2.3757	4	1.85636	5	2.06155	4	2.3952	7	2.5182	4	1.85636	6	2.1161	4	1.85636	4	1.88829	5	1.97571	3	1.62107	3	1.72035	2	1.47518	2	1.47518	6	2.519
KP738361.1_Tuber_macrosporum_France	6	2.18856	6	2.18856	6	2.18856	6	2.43001	19	3.90466	6	2.43001	17	3.81506	8	2.98081	1	0.904031	0	0	7	2.68048	4	1.85864	1	0.904031	1	0.913203	1	0.904031	7	2.5706	2	1.19236	6	2.15038	6	2.18856	5	2.08339	5	2.08339	9	2.79249	5	2.06155
KP738360.1_Tuber_macrosporum_Slovenia	2	1.25931	2	1.25931	2	1.25931	0	0	23	4.69726	0	0	23	4.62619	6	2.33764	5	2.20018	6	2.43001	5	2.21938	8	2.82934	5	2.20018	7	2.5706	5	2.20018	1	0.913203	6	2.40278	4	1.85799	2	1.25931	3	1.5891	3	1.5891	7	2.50517	3	1.64151	6	2.43001
MW884554.1_Tuber_macrosporum_Iran	5	2.01259	5	2.01259	5	2.01259	5	2.05667	23	4.27154	5	2.05667	22	4.09853	7	2.54406	6	2.26783	7	2.46337	6	2.54249	7	2.39821	6	2.26783	7	2.46337	6	2.26783	5	2.05667	6	2.26783	4	1.87336	5	2.01259	4	1.87336	4	1.87336	7	2.56808	4	1.93333	7	2.46337	5
MW432548.1_Tuber_macrosporum_Turkey	2	1.41746	2	1.41746	2	1.41746	4	1.86545	25	4.70009	4	1.86545	25	4.55737	8	2.87687	7	2.46747	8	2.54169	7	2.69071	10	2.99319	7	2.46747	9	2.66477	7	2.46747	5	2.02357	8	2.63793	6	2.42085	2	1.41746	5	2.23514	5	2.23514	9	2.95618	5	2.44889	8	2.54169	4
MW423732.1_Tuber_macrosporum_Turkey	3	1.62381	3	1.62381	3	1.62381	3	1.66436	20	4.32372	3	1.66436	20	4.28806	5	2.30281	2	1.44236	3	1.82782	4	2.22329	5	2.28608	2	1.44236	4	1.98507	2	1.44236	4	1.92548	3	1.70572	3	1.56489	3	1.62381	2	1.38957	2	1.38957	6	2.28908	2	1.5109	3	1.82782	3
MW362408.1_Tuber_macrosporum_Turkey	17	3.62199	17	3.62199	17	3.62199	17	3.74657	29	5.59061	17	3.74657	29	5.11937	14	3.18664	18	3.8363	19	3.90714	12	3.03182	20	4.10809	18	3.8363	20	3.98324	18	3.8363	18	3.90902	19	3.94298	15	3.30894	17	3.62199	14	3.13024	14	3.13024	11	3.00337	16	3.61808	19	3.90714	17
JF926121.1_Tuber_macrosporum_Germany	2	1.28594	2	1.28594	2	1.28594	2	1.3096	21	4.30573	2	1.3096	21	4.23858	4	2.15688	3	1.63531	4	1.94562	3	2.06645	6	2.39055	3	1.63531	5	2.05726	3	1.63531	3	1.67486	4	1.83047	2	1.34311	2	1.28594	1	1.06453	1	1.06453	5	2.17414	1	1.08484	4	1.94562	2
KP738378.1_Tuber_macrosporum_Italy	5	1.97346	5	1.97346	5	1.97346	5	2.20018	18	3.92794	5	2.20018	18	3.71271	7	2.85139	0	0	1	0.904031	6	2.59953	3	1.72945	0	0	2	1.19236	0	0	6	2.40278	1	0.913203	5	2.00262	5	1.97346	4	1.87013	4	1.87013	8	2.76725	4	1.85636	1	0.904031	5
KP738377.1_Tuber_macrosporum_Hungary	5	2.23661	5	2.23661	5	2.23661	5	2.31822	22	4.49017	5	2.31822	22	4.46309	5	2.41567	6	2.37997	7	2.57138	4	2.44949	9	2.93146	6	2.37997	8	2.71195	6	2.37997	6	2.6	7	2.57611	3	1.8739	5	2.23661	2	1.48949	2	1.48949	6	2.49709	4	2.16725	7	2.57138	5
KP738374.1_Tuber_macrosporum_Hungary	4	1.84226	4	1.84226	4	1.84226	4	1.81286	23	4.7505	4	1.81286	23	4.63164	2	1.53145	5	2.23959	6	2.37144	1	1.10992	8	2.81516	5	2.23959	7	2.51	5	2.23959	5	2.14617	6	2.43344	2	1.56992	4	1.84226	1	1.11265	1	1.11265	3	1.68999	3	1.89588	6	2.37144	4
KP738370.1_Tuber_macrosporum_Italy	6	2.18985	6	2.18985	6	2.18985	6	2.32707	18	3.92794	6	2.32707	19	3.78902	8	2.95249	1	1.08484	2	1.2988	7	2.7963	4	2.00565	1	1.08484	3	1.43956	1	1.08484	7	2.47564	2	1.33859	6	2.10461	6	2.18985	5	2.03353	5	2.03353	9	2.97844	4	1.85636	2	1.2988	6
KP738368.1_Tuber_macrosporum_Hungary	0	0	0	0	0	0	2	1.25931	23	4.44818	2	1.25931	23	4.44908	6	2.36513	5	1.97346	6	2.18856	5	2.33281	8	2.63763	5	1.97346	7	2.37178	5	1.97346	3	1.54776	6	2.22702	4	1.94011	0	0	3	1.64458	3	1.64458	7	2.57562	3	1.72035	6	2.18856	2
KP738367.1_Tuber_macrosporum_Hungary	3	1.57541	3	1.57541	3	1.57541	3	1.56589	22	4.45034	3	1.56589	22	4.42759	5	2.41494	4	1.97814	5	2.21373	4	2.25852	7	2.54066	4	1.97814	6	2.30599	4	1.97814	4	1.87409	5	2.1353	3	1.56589	3	1.57541	2	1.34581	2	1.34581	6	2.39452	2	1.66906	5	2.21373	3
KP738366.1_Tuber_macrosporum_Hungary	0	0	0	0	0	0	2	1.25931	23	4.44818	2	1.25931	23	4.44908	6	2.36513	5	1.97346	6	2.18856	5	2.33281	8	2.63763	5	1.97346	7	2.37178	5	1.97346	3	1.54776	6	2.22702	4	1.94011	0	0	3	1.64458	3	1.64458	7	2.57562	3	1.72035	6	2.18856	2
KP738356.1_Tuber_macrosporum_Italy	5	1.97346	5	1.97346	5	1.97346	5	2.20018	18	3.92794	5	2.20018	18	3.71271	7	2.85139	0	0	1	0.904031	6	2.59953	3	1.72945	0	0	2	1.19236	0	0	6	2.40278	1	0.913203	5	2.00262	5	1.97346	4	1.87013	4	1.87013	8	2.76725	4	1.85636	1	0.904031	5
KP738355.1_Tuber_macrosporum_Italy	2	1.25931	2	1.25931	2	1.25931	0	0	23	4.69726	0	0	23	4.62619	6	2.33764	5	2.20018	6	2.43001	5	2.21938	8	2.82934	5	2.20018	7	2.5706	5	2.20018	1	0.913203	6	2.40278	4	1.85799	2	1.25931	3	1.5891	3	1.5891	7	2.50517	3	1.64151	6	2.43001	0
KP738354.1_Tuber_macrosporum_Italy	6	2.22702	6	2.22702	6	2.22702	6	2.40278	18	3.92794	6	2.40278	17	3.59944	8	3.08589	1	0.913203	2	1.19236	7	2.73614	3	1.72945	1	0.913203	2	1.19236	1	0.913203	5	2.20018	0	0	4	1.87013	6	2.22702	5	2.00262	5	2.00262	8	2.76725	5	1.97571	2	1.19236	6
KP738353.1_Tuber_macrosporum_Italy	6	2.22702	6	2.22702	6	2.22702	6	2.40278	18	3.92794	6	2.40278	17	3.59944	8	3.08589	1	0.913203	2	1.19236	7	2.73614	3	1.72945	1	0.913203	2	1.19236	1	0.913203	5	2.20018	0	0	4	1.87013	6	2.22702	5	2.00262	5	2.00262	8	2.76725	5	1.97571	2	1.19236	6
KP738352.1_Tuber_macrosporum_Italy	5	1.97346	5	1.97346	5	1.97346	5	2.20018	18	3.92794	5	2.20018	18	3.71271	7	2.85139	0	0	1	0.904031	6	2.59953	3	1.72945	0	0	2	1.19236	0	0	6	2.40278	1	0.913203	5	2.00262	5	1.97346	4	1.87013	4	1.87013	8	2.76725	4	1.85636	1	0.904031	5
KP738351.1_Tuber_macrosporum_Italy	3	1.54776	3	1.54776	3	1.54776	1	0.913203	23	4.69726	1	0.913203	22	4.5249	7	2.69641	6	2.40278	7	2.5706	6	2.46339	8	2.82934	6	2.40278	7	2.5706	6	2.40278	0	0	5	2.20018	3	1.5891	3	1.54776	4	1.85799	4	1.85799	7	2.50517	4	1.88829	7	2.5706	1
KP738350.1_Tuber_macrosporum_Italy	5	1.97346	5	1.97346	5	1.97346	5	2.20018	18	3.92794	5	2.20018	18	3.71271	7	2.85139	0	0	1	0.904031	6	2.59953	3	1.72945	0	0	2	1.19236	0	0	6	2.40278	1	0.913203	5	2.00262	5	1.97346	4	1.87013	4	1.87013	8	2.76725	4	1.85636	1	0.904031	5
KP738349.1_Tuber_macrosporum_Italy	2	1.25931	2	1.25931	2	1.25931	0	0	23	4.69726	0	0	23	4.62619	6	2.33764	5	2.20018	6	2.43001	5	2.21938	8	2.82934	5	2.20018	7	2.5706	5	2.20018	1	0.913203	6	2.40278	4	1.85799	2	1.25931	3	1.5891	3	1.5891	7	2.50517	3	1.64151	6	2.43001	0
KP738348.1_Tuber_macrosporum_Italy	6	2.21881	6	2.21881	6	2.21881	6	2.40242	18	4.035	6	2.40242	18	3.94999	8	3.03488	1	1.02745	2	1.34028	7	2.69101	4	1.95143	1	1.02745	3	1.66776	1	1.02745	7	2.66172	2	1.50672	6	2.26656	6	2.21881	5	2.05998	5	2.05998	9	3.07318	5	2.06645	2	1.34028	6
PP948901.1_Tuber_macrosporum_Spain	3	1.57541	3	1.57541	3	1.57541	3	1.56589	22	4.45034	3	1.56589	22	4.42759	5	2.41494	4	1.97814	5	2.21373	4	2.25852	7	2.54066	4	1.97814	6	2.30599	4	1.97814	4	1.87409	5	2.1353	3	1.56589	3	1.57541	2	1.34581	2	1.34581	6	2.39452	2	1.66906	5	2.21373	3
KP738345.1_Tuber_macrosporum_France	6	2.18856	6	2.18856	6	2.18856	6	2.43001	18	3.96418	6	2.43001	17	3.81506	8	2.98081	1	0.904031	0	0	7	2.68048	4	1.85864	1	0.904031	1	0.913203	1	0.904031	7	2.5706	2	1.19236	6	2.15038	6	2.18856	5	2.08339	5	2.08339	9	2.79249	5	2.06155	0	0	6
MW884553.1_Tuber_macrosporum_Iran	5	2.01259	5	2.01259	5	2.01259	5	2.05667	23	4.27154	5	2.05667	22	4.09853	7	2.54406	6	2.26783	7	2.46337	6	2.54249	7	2.39821	6	2.26783	7	2.46337	6	2.26783	5	2.05667	6	2.26783	4	1.87336	5	2.01259	4	1.87336	4	1.87336	7	2.56808	4	1.93333	7	2.46337	5
MK139939.1_Penicillium_sp.	67	8.19445	67	8.19445	67	8.19445	67	8.19953	84	8.95246	67	8.19953	81	8.42996	71	8.35367	66	8.13534	65	7.97063	70	8.09674	69	8.27089	66	8.13534	66	8.08228	66	8.13534	68	8.26197	67	8.23083	69	8.20374	67	8.19445	68	8.12551	68	8.12551	72	7.97645	68	8.18597	65	7.97063	67
[truncated: 49 more columns]

## Sheet: Caption
Table. Estimates of Evolutionary Divergence between Sequences
The number of base differences per sequence from between sequences are shown. Standard error estimate(s) are shown in every other column. This analysis involved 50 nucleotide sequences. Codon positions included were 1st+2nd+3rd+Noncoding. All ambiguous positions were removed for each sequence pair (pairwise deletion option). There were a total of 342 positions in the final dataset. Evolutionary a…
1. Kumar S., Stecher G., Li M., Knyaz C., and Tamura K. (2018). MEGA X: Molecular Evolutionary Genetics Analysis across computing platforms. Molecular Biology and Evolution 35:1547-1549.
Disclaimer: Although utmost care has been taken to ensure the correctness of the caption, the caption text is provided "as is" without any warranty of any kind. Authors advise the user to carefully check the caption prior to its use for any purpose and report any errors or problems to the authors immediately (www.megasoftware.net). In no event shall the authors and their employers be liable for a…
